# Supplementary material for: Subclinical hypothyroidism during pregnancy and the impact of levothyroxine therapy on pregnancy outcomes in women
Source: PeerJ. 2025 Apr 28;13:e19343. doi: 10.7717/peerj.19343 (PMC12045264; doi:10.7717/peerj.19343)
Supplement: Supplemental Information 1 [file peerj-13-19343-s001.xlsx]

## Sheet: 938 people were analyzed
ID	Age	Last menstruation	Education level High school 1 Junior College 2 Undergraduate graduate 3	Prepregnancy weight	height	BMI	Annual household income, 1= less than 50,000, 2= 50,000 to 100,000 = more than 100,000	parity	Family history of diabetes	Smoking or secondhand smoke exposure for more than 15 minutes per week	Alcohol consumption	Folic acid supplementation	VD supplementation is not 0 before pregnancy 1 early pregnancy 2	1	TSH	FT3	FT4	TPO	iron	zinc	magnesium	phosphorus	copper	calcium	Homocysteine	SF	VB12	Folic acid	TG	TC	HDL	LDL	TSH2	FT32	FT42	TPO2	iron	zinc	calcium	FPG	PG1H	PG2H	SF	VB12	Folic acid	TSH3	FT33	FT43	TPO3
1	30	11.1	1	66	163	24.841	1	2	0	0	0	1	2	1	0.512	4.66	17.52																1.63	4.41	12.23	14.73			2.23	4.8	6.4	6.2	7.98	211	18.1	1.44	4.29	11.75	8.08
2	27	10.3	2	52	163	19.5717	1	1	0	0	0	1	2	1	1.5	4.48	23.62	9.06	26.7	14.5				2.37					0.46	3.06	1.37	1.44	2.47	4.26	13.04		24	9	2.26	4.3	5.5	5.4	22.3	271	18.8	2.44	4.2	15.59	9.09
3	30		1	40	160	15.625	2	2	1	0	0	2	2	1	1.93	4.56	15.59	9.41															2.31	4.68	11.54	13.75	13.3	9.9	2.43	4.7	8.9	6.8	46.44	183	10.8	4.01	4.34	10.55	6.74
4	24	11.12	3	61	170	21.1073	3	1	0	0	0	2	0	1	1.23	5.01	14.94	9.72															0.82	4.75	12.99		21.5	9.2	2.27	4.6	8.9	6	42.79	300	6.6	1.54	4.59	12.19	18.46
5	25	10.18	3	46	158	18.4265	3	1	0	0	0	1	2	1	1.14	4.3	16.59	7.21															0.952	4.61	13.73		18.2	8.3	2.35	4.6	6.4	7.5	29.52	401	14.6	1.36	4.33	13.53	11.47
6	25	10.24	3	50	160	19.5312	1	1	0	0	0	2	2	1	2.14	4.12	15.63	7.25	21.9	10.7				2.17									4.37	4.28	13.95	14.3	28.1	8.5	2.06				18.83	365	17.5	3.19	3.94	13.25
7	31	2018-11-25	3	55	163	20.7008	3	1	0	1	0	1	0	1	1.6	5.12	15.3	5	11.1	8				2.17									1.91	4.06	14.05	12.47										2.27	4.32	14.13	10.34
8	38	10.27	3	64	163	24.0882	2	2	1	0	0	2	2	1	0.476	5.29	18.7	8.57	7.6	13.3				2.31	8.24				1.64	3.52	1.03	2.26	1.27	5.28	15.02		31.1	7.8	2.18	4.4	7	6.4	11.07	284	12	2.91	4.67	16.19	8.35
9	23	11.1	1	48	158	19.2277	1	1	0	1	0	1	2	1	1.63	5.37	22	123.7															2.72	4.27	16.94	52.87	20.8	9.2	2.22				18.75	448	17	2.69	4.32	18.81	30.12
10	24	11.3	3	48	158	19.2277	2	1	0	0	0	2	2	1	3.1	5.13	19.29	15.61	13.4	12.8				2.29									1.81	4.71	12.66	24.93	12	8.7	2.28			7.9	21.54	383	16.7	4.04	4.85	12.37	11.06
11	31	12.14	3	61	168	21.6128	3	1	0	0	0	2	2	1	3.45	4.16	16.24	7.8															2.66	4.09	11.85	15.9	8.4	7.8	1.93				15.52	329	11	4.88	3.66	11.91	7.91
12	31	12.18	3	45	155	18.7305	3	2	0	0	0	2	2	1	1.92	4.77	19.66	7.22															2.2	4.01	11.11	12.81	8.4	8.5	2.06				8.76	527	12.6	4.4	4.35	13.61	11.16
13	26	12.12	2	50	160	19.5312	2	1	0	1	0	1	2	1	3.77	5.39	15.52	7.57															4.34	4.72	13.79	8.54	12.3	8.4	2.19				27.82	167	13.4	7.21	4.98	13.64	13.81
14	30	2018-11-16	2	65	160	25.3906	2	1	0	0	0	1	2	1	3.16	5.77	16.12	12.5	27.1	11.9				2.19									3.26	5.06	12.98		15.9	8.6	2.13	4.4	8.9	6.7	8.48	282	14.4	4.63	4.16	15.54	16.55
15	32	12.25	3	63	160	24.6094	3	1	0	0	0	1	0	1	1.11	4.24	18.24	5	19.6	9.6				2.24									1.33	4.74	12.35	12.56	25.9	8.8	2.23				17.67	283	14.7	1.51	4.34	13.52	6.64
16	24	12.22	2	66	168	23.3844	1	1	0	0	0	1	0	1	0.192	6.45	20.54	10.91															1.22	4.78	11.36	18.37	14.2	6.9	2.17				14.19	327	7.8	1.59	4.54	11.54	10.46
17	22	12.28	2	60	163	22.5827	1	1	0	1	0	2	2	1	1.82	5.44	20.36	7.03	26.2	13.6				2.41									1.94	4.36	13	13.43	7.3	8.9	2.29				9.75	163	4.3	2.26	4.12	13.27	11.7
18	28	12.4	1			21.649	1	1	0	0	0	0	0	1	1.26	4.92	17.65	12.65	26.1	13.2				2.37									1.16	3.77	12.77	14.03	27.9	8.9	2.21				17.38	285	18.6	2.02	3.67	14.1	16.08
19	28	12.5	3	63	168	22.3214	3	1	0	0	0	1	0	1	0.955	5.69	21.36	6.02	21.4	11.9				2.37					1.14	4.56	1.17	2.78	1.84	5.17	14.82	8.93	10.4	8.5	2.22				10.1	164	4.8	2.57	4.3	15.11	12.4
20	26	2018-12-09	2	63	168	22.3214	2	1	0	0	0	1	1	1	1.26	4.82	14.26	7.53															1.79	3.79	8.32	10.48	18.5	8.1	2.3	4.6	7.1	6.2	12.66	363	14.5	2.14	4.17	9.44
21	28	12.6	3	54	150	24	2	1	0	0	0	0	2	1	1.53	5.15	17.6																2.15	4.51	12.83		14.9	9.1	2.11	4.7	7.7	6.2				1.76	4.65	13.28	16.53
22	26	12.1	3	52	169	18.2066	2	1	0	1	0	2	2	1	0.72	4.24	15.69	8.25															2.16	3.85	12.84		12.8	7.7	2.1	4.7	6.4	8.1	6.14	436	14.1	6.54	3.87	12	11.02
23	28	12.1	2	68	168	24.093	3	1	0	0	0	2	2	1	1.12	5.07	15.89	10.72	14.7	10.8				2.3									2.37	5.14	12.1	13.6	12	8	2.11	4.9	7	6.5	32.26	317	8.7	3.12	4.61	12.8	11.12
24	24	12.12	2	55	164	20.4491	2	1	0	0	0	1	0	1	1.4	4.68	19.11	7.93															2.42	3.77	12.85		17.4	7.2	2.11	4.5	6.9	6	11.48	503	14	4.14	3.76	14.65	13.9
25	23	1.12	1			21.649	1	1	0	0	0	0	0	1	0.34	4.97	16.69	15.08															1.12	4.02	14.24	7.4	13.4	7.3	2.14				13.66	481	9.5	1.85	3.99	12.81	13.52
26	31	1.13	3	56	168	19.8413	3	1	0	0	0	2	0	1	3.3	5.4	16.51	36.85	13.2	13.9				2.32									1.11	5.12	11.93		15.3	8.4	2.35	5	9.8	9.3	14.58	400	18.2	2.73	4.35	13.98	11.26
27	28	1.9	3	58	171	19.8352	3	1	0	0	0	1	1	1	1.1	4.97	17.5	8.01	21.3	13				2.36					0.91	4.84	1.08	3.18	1.84	4.06	12.8	9.22	22.4	9.3	2.17				30	254	17.8	2.49	4.24	14.37	12.97
28	33	1.3	2	50	160	19.5312	2	3	0	0	0	2	2	1	1.79	5.45	20.08	14.56	35.2	11.6				2.36					0.7	3.47	1.31	1.73	1.37	3.8	14.68	9.76	32.5	9.3	2.18	4.7	7.2	6.2	26.04	288	16.6	1.4	3.61	14.33	9.26
29	30	1.21	3	50	159	19.7777	3	1	0	1	0	2	2	1	1.15	5.29	19.56	21.46	15.9	11.8				2.34					1.81	5.76	2	3.03	2.53	4.26	14.16		16.6	9.4	2.15	4.8	8.7	6.8	22.94	327	17.9	4.12	4.12	15.57	16.01
30	26	2.24	3	58	165	21.3039	2	1	0	0	0	1	0	1	2.24	5.36	17.18	11.33	23.7	11.4				2.41									2.76	4.26	16.9	7.87	17.3	8.6	2.21	4.8	7.5	7.8	9.38	282	17.9	3.53	4.1	16.13	11.69
31	21	1.23	2	55	162	20.9572	1	1	0	0	0	1	0	1	2.4	5.43	16.25	14.36	16	12.4				2.35									3.47	4.07	11.94	13.19	5.9	7	2.2	4.6	4.9	4.1	4.51	455	4.7	2.73	3.94	12.79	16.71
32	32	2.9	2	51	158	20.4294	3	2	0	1	0	1	0	1	1.04	4.9	15.83	14.08															1.32	4.58	14.88	10.21	19.2	7.9	2.17	4.5	8.9	6.7	23.37	214	15.6	1.22	3.29	14.13	7.09
33	28	2.3	3	63	165	23.1405	2	1	0	0	0	2	2	1	0.84	5.31	20.24	11.15															2.47	4.47	16.72	11.72	12.7	8.4	2.11	3.9	7.7	6	7.13	366	7.1	3.35	3.83	16.81	8.66
34	25	2.11	3	58	170	20.0692	2	1	0	0	0	1	0	1	2.82	4.97	17.24	10.45	29.2	12.8				2.26					0.7	4.32	1.78	2.03	2.48	3.95	14.05		11	7.4	2.12	4.6	6.9	7.4	14.09	453	9.9	4.13	4.08	12.49	14.33
35	24	3.3	3	55	163	20.7008	3	1	0	0	0	2	0	1	1.36	5.27	17.5	12.78															1.93	4.44	13.26		13.1	6.9	2.29	5.3	6.9	6.2	10.31	210	5.6	1.52	3.71	12.63	10.36
36	30	2.23	3	52	160	20.3125	3	1	0	0	0	1	1	1	2.88	4.63	15.18	10.92															3.92	3.69	12.4	17.84	10.2	8.2	2.26				6.18	186	13.9	4.01	3.77	13.17	19.15
37	27	2.21	3	53	165	19.4674	3	1	1	0	0	1	2	1	1.66	5.32	17.31	10.3	23.3	12.2				2.29					1.19	4.46	1.27	2.57	2.51	4.75	13.58	15.05	16.6	8.4	2.21				21.51	246	15.6	1.65	4.27	12.94	14.22
38	26	4.4	2	62	157	25.1532	1	2	0	0	0	1	1	1	1.82	4.84	14.57	14.83	25.1	11.8				2.41									1.61	3.82	11.53	16.05	18.1	8	2.25				5.54	341	12.4	1.76	4.08	10.61	10.92
39	27	3.5	2	54	158	21.6311	3	2	0	0	0	2	0	1	0.766	4.68	16.94	7.87															1.02	4.25	14.93	11.32	20.1	6.3	2.1				43.35	559	4.5	2.58	4.35	13.46	13.46
40	26	4.9	3	55	170	19.0311	2	1	0	0	0	2	0	1	0.373	5.55	19.51	15.72															0.534	4.65	17.97	14.73	21.5	8.2	2.15				26.16	543	17.3	1.07	3.83	14.28	17.89
41	27	2019-04-01	2	69	156	28.3531	3	1	0	0	0	2	2	1	0.304	4.77	17.04	14.41	17	11.1				2.35					1.07	4.9	1.55	3.08	0.577	4.96	14.18	11.83	20.4	8.6	2.28	5.1	8.8	8.3	17.7	391	10.4	1.17	4.03	13.69	8.53
42	28		2	66	158	26.4381	1	1	0	0	0	2	0	1	1.66	5.32	15.27	17.91	13.9	10.1				2.37									2.93	4.83	12.03					5	9.1	7.9				2.85	4.14	11.64	11.52
43	35	2019-05-04	1	60	160	23.4375	3	2	0	0	0	1	0	1	2.1	4.92	17.36	12.36															2.76	4.58	12.58		9.1	6.6	2.06	5	10.5	6.6	7.21	323	14	2.28	4.37	11.58	15.87
44	33	4.6	1	60	153	25.6312	1	1	0	0	0	2	0	1	2.11	5.21	13.86	5															2.17	4.78	11.61	11.38	23.2	9.7	2.24				34.95	215	16.4	3.18	4.48	11.61	7.24
45	32	4.5	1	63	162	24.0055	3	3	0	0	0	1	0	1	1.53	4.7	16.61	5															1.94	4.61	13.48		12.9	8.4	2.12	4.9	6.6	5.5	3.15	305	7.5	2.15	4.59	12.24	7.73
46	30	4.1	3	81	175	26.449	2	1	0	0	0	2	2	1	1.22	5.37	11.77	19.79															1.8	4.22	7.48	14.1	16.4	8.6	2.23				34.49	263	18.5	3.34	4.17	9.11	17.4
47	32	2019-05-05	3	61	162	23.2434	2	2	0	0	0	1	2	1	3.18	4.65	16.2	14.35															2.56	4.16	13.6	8.6	12.1	10.5	2.25	4.2	7	5.7	6	240	16.8	4.07	4.59	13.98	21.28
48	26	6.17	2	52	160	20.3125	2	1	0	0	0	2	0	1	3.29	4.41	15.75	8.27	21	10.5				2.35									2.67	3.87	12.23	7.77	37.6	9.1	2.16	4.6	8.1	7.1	35.48	446	14.1	4.23	3.12	10.65	14.4
49	29	6.21	3	62.5	172	21.1263	2	1	0	0	0	1	1	1	1.94	4.73	14.33	13.77															1.79	3.81	11.18	14.66	13.2	8.3	2.13	5.1	6.8	6.9	8.84	402	14.1	1.75	3.12	10.36	19.78
50	26	5.28	1	66.5	166	24.1327	2	1	0	0	0	1	1	1	0.717	5.09	17.18	18.45	24.9	12.4				2.29									0.835	4.33	13.33		19.1	8.5	2.13	4.7	8	7	11.81	370	15	1.68	5.07	14.96	21.38
51	29	2019-05-24	2	83.5	175	27.2653	3	2	0	0	0	2	2	1	2.84	4.91	13.63	6.51															1.68	3.99	12.23		25.2	9	2.22	4.6	5.4	6.4	50.14	315	17.4	2.28	3.78	12.19
52	28	2019-05-28	3	63	174	20.8086	1	1	0	0	0	2	0	1	0.203	4.99	17.43	16.08	16.4	13				2.32									1.08	3.82	11.94		23.7	9.4	2.2	4.3	7.8	5.5	20.46	436	16.5	1.84	3.9	10.87	20.2
53	24	2019-05-28	1	75	162	28.578	1	2	0	0	0	2	2	1	3.15	4.82	15.21	589															2.86	4.64	13.08		6.3	7.3	2.29	4.9	8	6.8	2.44	170	2.9	1.59	4.46	11.23	165.1
54	26	7.7	2	52	160	20.3125	3	2	0	0	0	2	2	1	3.18	5.45	17.81	13.95	25	11.4				2.3									3.6	5.15	15.29	18.96				4.4	5.5	5.4	12.22	159	8	4.04	4.37	12.73	21.95
55	25		2	50	162	19.052	2	1	0	0	0	1	2	1	1.33	4.71	16.3	5	16	9.6				2.27									0.21	4.68	12.18	5.35	11.8	8.3	2.21	4.8	5.5	5.8	7.94	325	4.2	1.02	4.99	9.75	10.84
56	30	2019-06-26	2	61	160	23.8281	1	1	0	0	0	2	2	1	3.24	5.21	18.54	463.7															3.2	4.83	12.9	341.6	14.6	6.1	2.13	5.4	5.7	6.5	22.49	220	17.8	1.31	4.57	12.72	188.9
57	27	2019-07-03	2	56	160	21.875	2	2	0	0	0	1	0	1	3.27	5.25	18.61	7.1															3.59	4.49	15.69		12.8	7.8	2.09	4.7	4.8	5.9	7.8	414	16.1	5.04	4.07	13.88	10.72
58	26	2019-06-22	1	54	160	21.0938	1	2	0	0	0	2	0	1	3.44	5.49	19.38	22.66															3.7	4.29	14.57		11.4	9.7	2.17	4.8	7.3	7.8	22.5	218	17.6	4.54	3.87	13.78	20.66
59	24	7.5	3	74	177	23.6203	2	1	0	1	0	2	2	1	2.54	4.85	15.53	9.49	29.9	14.1				2.28	7.68								3	4.03	12.86					4.9	6	6	3.32	491	18.2	7.28	4.08	10.44	16.07
60	26	2019-06-13	3	66	159	26.1066	3	1	0	0	0	1	1	1	3.03	5.25	16.54	12.13	19.1	11.1				2.36									2.6	4.16	12.79		17.7	8	2.23	4.3	9.5	8.2				2.31	4.15	11.55
61	30	2019-06-15	3	57	158	22.8329	3	1	0	0	0	1	0	1	3.45	4.52	14.58	11.29															2.46	3.89	10.33		11.6	7.4	2.19	4.8	6.7	6.5	13.15	307	15.2	2.96	3.7	8.65	18.15
62	24	2019-06-15	2	50	160	19.5312	2	1	0	0	0	2	0	1	1.05	5.46	16.58	10.7															0.936	5.01	12.38		8.9	7.4	2.19	4.2	6.3	5.9	2.87	296	12.2	1.44	4.16	8.13	12.81
63	27	6.16	3	51	165	18.7328	3	1	0	0	0	2	2	1	1.25	5.18	17.59	7.34															1.35	3.91	12.54	20.85	36.1	9.9	2.24							2.96	3.8	11.35
64	31	2019-06-18	1			21.649	1	1	0	0	0	0	0	1	2.68	4.8	15.78	11.36	7.4	10.3				2.33									3.47	3.94	12.11		10.1	9.5	2.26	5.2	9.8	8	5.12	141	6.4	5	3.57	11.57	13.87
65	31	2019-07-03	2	65	163	24.4646	2	1	0	0	0	1	1	1	1.62	5.28	16.34	5.5															1.42	4.97	13.79		7.2	7.8	2.2	5.4	5.1	8.3	3.05	188	11.5	1.96	4.06	12.9	7.49
66	25	6.23	3	46	166	16.6933	3	1	0	0	0	2	2	1	0.891	4.63	17.03	10.49	28.8	10.8				2.38					0.49	3.38	1.35	1.57	1.46	3.86	14.06	16.26	21.6	8.8	2.16	4.5	8.5	6.4	38.39	442	13.4	1.8	3.36	11.64	9.58
67	29		2	50	166	18.1449	1	1	0	0	0	2	0	1	1.73	4.98	17.81	8.87	25.2	13.7				2.26									2.93	4.26	13.3	13.07	17.3	8.1	2.06	4.2	7.7	5	3.94	391	14.4	4.57	4.19	11.38
68	32	6.18	2	52	163	19.5717	2	2	0	0	0	1	0	1	1.87	4.92	16.05	5															3.01	4.48	12.42	11.8	14.7	8.3	2.06	4.7	6.9	5.3	6.03	198	5.5	2.79	4.4	10.86	11.94
69	26	2019-07-26	2	49	165	17.9982	2	1	0	0	0	2	0	1	0.005	6.8	25.77	16.26															3.13	3.95	14.25		16.5	7.6	2.22	4.4	5	5.6	26.85	290	12	2.01	3.79	13.09	10.6
70	31	2019-07-06	1	54	160	21.0938	2	3	0	0	0	2	0	1	0.886	5.52	17.45	9.78															2.02	4.13	13.12		7.5	7.8	2.17	4.4	7	6.2	＜1	171	3.8	2.52	4.16	12.84	13.98
71	26	2019-07-02	3	60	164	22.3081	3	1	1	1	0	2	2	1	0.853	5.21	16.48	9.6	17.3	12.1				2.32					0.53	3.82	1.34	2.25	0.709	5.06	12.01		20.7	8.5	2.26	4.6	8.7	7.7	18.28	341	17.1	1.3	4.12	9.67	8.61
72	27	7.18	3	57	161	21.9899	1	1	0	1	0	1	1	1	3.46	5.39	20.02	8.42	20.8	10.6				2.34									2.31	4.59	12.92					5	5.8	5.8	14.68	394	18.6	3.17	4.68	11.88
73	26	7.15	2	63	165	23.1405	2	1	0	0	0	2	2	1	2.28	5.38	17.53	8.73	13.4	9.7				2.25					0.66	4.69	1.8	2.27	2.11	4.61	12.91	11.77	11.9	8.5	2.11	4.5	9.9	7.5	3.55	234	14.6	2.74	4.44	12.08	7.27
74	29	2019-07-25	2	53	150	23.5556	1	2	0	0	0	2	2	1	2.56	5.08	16.14	7.86															2.36	4.25	13.01		14	8.6	2.07	4.9	8.1	7.4	17.65	314	16.1	2.16	4.09	12.12	7.08
75	25	2019-09-10	2	62	158	24.8358	3	1	0	0	0	2	0	1	2.8	4.48	15.96	5	21.5	12.5				2.34									2	4.65	11.97		12.7	9.6	2.2	4.5	7.5	6.9	14.12	238	19.5	4.01	3.85	10.74	7.63
76	25	2019-09-19	2	62	158	24.8358	1	2	0	1	0	2	0	1	0.909	5.68	18.98	10.6															0.551	5.28	12.81		18.9	7.9	2.17	5.2	8	7.3	11.7	178	3.2	0.526	4.13	14.55
77	26	8.12	3	48	160	18.75	3	1	0	0	0	0	1	1	2.42	4.23	17.09	8.25															3.28	3.01	10.96	15.84	23	8.5	2.12	4.4	6	4.2	5.68	416	17.2	6.29	3.13	13.34	9.46
78	33	8.23	1	53	157	21.5019	2	1	0	0	0	2	0	1	2.25	4.84	18.75	10.29	17.6	11.1				2.4									2.51	5.02	11.46	10.84	25.8	9.3	2.23	4.7	7.5	7.9	6.12	299	18.5	2.74	4.38	13.55	8.51
79	33	9.25	3	59	160	23.0469	3	1	0	0	0	2	2	1	2.08	4.59	17.62	5.29	8.4	8.8				2.16									2.96	4.82	15.16		8.2	6.2	2.05	5.5	9.9	7.8	10.48	332	16.6	2.92	3.87	15.08	10.83
80	27		2	50	150	22.2222	1	1	0	0	0	2	2	1	0.621	4.98	14.26	9.59															2.21	4.81	8.9	9.84	20.3	8.7	2.22	5.4	9.3	7.7	24.59	350	16	2.35	4.4	9.43	8.33
81	30	2019-08-26	2	52	161	20.061	1	2	1	0	0	2	2	1	1.77	4.35	17.26	9.06															2.78	4.62	14.09		20.5	8.6	2.22	5.2	7.4	6.2	4.84	33.4	14.6	4.14	4.4	12.45
82	25	2019-09-10	2	55	167	19.721	1	1	0	0	0	1	2	1	2.59	5.52	18.51	9.84															0.967	4.26	11.73		24.1	8.8	2.19	4.8	8.9	7.5	9.41	257	14.8	2.64	4.04	12.18	7.42
83	37	2019-09-14	1	70	165	25.7117	1	2	0	0	0	1	1	1	6.56	4.3	13.51	123.2															2.02	4.4	17.23		24.6	8.8	2.26	4.5	10.1	8.8	9.46	146	16.6	0.928	3.7	15.55	71.41
84	28	9.15	2	49	165	17.9982	2	1	0	0	0	1	1	1	1.88	4.65	15.98	8.14	17.8	11				2.31					0.66	3	1.42	1.17	2.74	4.03	11.54		32.9	8.6	2.19	4.9	9.4	8.5	28.75	378	19.4	2.45	2.86	12.17	9.38
85	26	2019-09-22	3	48	155	19.9792	2	1	0	0	0	2	2	1	0.811	5.39	16.86	8.32															1.75	4.83	9.74		21.2	7.6	2.24	5.2	7.8	7.4	16.8	148	13.6	1.9	4.35	11.35	8.27
86	28	2019-09-11	3	62	170	21.4533	3	1	0	0	0	2	0	1	2.04	5.09	20.55	28.46	15	10.3				2.26					0.7	3.41	1.32	1.59	3.36	3.72	11.36		11.2	8.2	2.14	4.9	8.7	7.1	8.25	176	14.2	3.84	3.45	13.63	20.89
87	24	2019-10-20	2	54	169	18.9069	2	1	0	0	0	1	0	1	1.18	4.37	17.08	11.64															2.06	3.85	12.18		19	8.3	2.13	4.6	4.5	5.5	7.28	241	11.8	1.96	3.35	10.95	11.76
88	27	2019-09-25	2	47	163	17.6898	2	1	0	0	0	1	1	1	0.989	4.58	17.17	5.81															1.79	4.31	13.68		12.2	8.8	2.13	4.9	7.2	5.4	2.82	387	18.2	1.55	3.71	14.03
89	27	9.22	2	48	168	17.0068	1	1	0	0	0	1	1	1	0.861	4.98	16.66	5.12	30.4	11.6				2.33									2.61	4.38	12.5		14.7	7.1	2.2	4.9	6.4	5.8	11.99	661	16.6	2.23	3.82	12.91
90	28	2019-09-24	2	75	160	29.2969	3	1	0	0	0	2	0	1	2.55	4.8	13.43	9.52															1.4	4.11	9.71		13.2	7.7	2.21	5	8.7	7.4	12.73	182	18.4	3.4	3.25	11.62	9.7
91	23	2019-10-15	2	70	165	25.7117	1	1	0	0	0	2	1	1	1.82	5.51	14.2	6.84															1.81	4.53	12.35		13.2	9.3	2.08	4.7	7.5	7.2	4.8	290	10.2	1.84	4.06	13.07
92	25	9.25	3	55	165	20.202	2	1	0	0	0	2	2	1	1.64	4.9	14.24	8.78															3.15	4.55	9.72	12.3							6.45	373	19	4.28	4.57	10.15	13.44
93	29	11.13	2	52	160	20.3125	2	1	0	0	0	1	0	1	1.74	5.26	17.68	11.67	26.8	12.3				2.35					0.7	4.15	1.53	2.07	2.46	4.03	11.16	10.43	23.9	9.5	2.22	5	8.9	7.1	21.65	244	18	3.52	3.94	10.83	9.41
94	23	9.28	2	64	170	22.1453	1	1	0	1	0	1	2	1	1.06	5.58	15.34	10.47											1.16	4.02	1.64	1.73	3.4	4.43	9.29		25.4	8	2.14	4.7	5.4	6.4	43.27	372	18.1	2.57	4.2	9.39
95	28	2019-10-23	3	56	164	20.8209	2	1	0	0	0	1	1	1	1.71	4.06	13.72	406.8															3.19	4.26	14.09		5.6	8.4	2.05	4.7	7.7	7.4	4.03	348	5.7	1.32	3.98	17.43
96	22	9.6	2	45	160	17.5781	3	1	0	0	0	2	2	1	0.83	4.4	16.49	13															2.52	4.28	12.77		7.9	10.4	2.22	4.9	5.9	6.3	7.3	607	14.6	2.38	3.77	13.35	16.56
97	29	2019-10-04	2	55	160	21.4844	2	2	0	1	0	2	2	1	2.07	5.66	16.1	8.97															2.15	6.31	10.56		30.8	8.3	2.1	5.1	6.6	6.7	11.59	393	19.6	5.39	4.41	11.56	5
98	26	2019-10-14	3	60	164	22.3081	3	1	0	0	0	1	1	1	1.63	4.89	15.9	7.61															1.55	4.19	10.95		25	9.7	2.21	5	5.2	5.5	9.58	329	17.7	1.73	3.84	10.8
99	29	2020-10-11	2	45	160	17.5781	1	1	0	0	0	2	0	1	2.47	4.79	15.1	16.53															2.57	4.52	10.75	15.14	7.4	9.2	2.24	5.4	10.7	10.2	4.33	182	19.2	2.44	3.66	10.07
100	26	2019-10-15	2	62	170	21.4533	2	1	1	0	0	2	2	1	2.81	5.54	19.45	15.86															1.63	4.75	12.36		13.4	6.8	2.17	5.2	7	6.4	30.28	342	16.9	2.15	4.06	12.44	9.14
101	24	2019-10-19	2	57	158	22.8329	1	1	0	0	0	0	0	1	3.37	5.67	14.74	10.19															4.13	3.98	11.16		13.1	7.9	2.2	4.9	6.2	5.8	6.95	197	13.8	2.85	3.55	11.26
102	25	2019-10-25	2	56	163	21.0772	3	1	0	0	0	1	0	1	4.77	6.37	14.06	13.82															1.71	5.07	10.01		12	8.5	2.22	4.6	5.5	5.2	22.97	386	17.7	1.37	4.43	11.27
103	27	10.19	2	65	155	27.0552	2	1	0	0	0	1	2	1	1.55	5.76	16.11	12.64											0.66	4.03	1.43	2.04	1.47	3.52	9.5	10.76	6.7	9.9	2.19	4.7	6.7	6.1	7.21	339	11	1.56	3.6	11.33	12.48
104	27	12.21	3	63	162	24.0055	3	2	0	0	0	2	2	1	2.36	4.66	14.84	7.22															1.99	3.71	11.68	12.5	20	9.3	2.19	4.8	7.3	5.4	7.15	465	16.7	2.6	3.44	9.34	12.82
105	26	2021-01-10	3	55	155	22.8928	1	1	0	0	0	1	1	1	2.03	5.52	16.8	134.5	24.1	11.2				2.33					0.82	5.46	1.62	3.06	1.53	4.11	14.13		8.4	9.7	2.26	4.9	8.3	7.3	7.61	474	＞20	1.32	3.61	13.75	58.26
106	25	2020-01-02	2	60	160	23.4375	3	1	0	0	0	1	0	1	1.25	4.65	12.32	6.75															1.69	3.51	9.74		5.4	8.6	2.36	5.2	7.9	7	1.86	463	10.7	1.69	3.18	10	8.85
107	28		1			21.649	1	1	0	0	0	0	0	1	1.62	5.5	15.45	8.97															1.53	3.52	11.19	8.79	20.1	10.2	2.4	4.8	7.2	6.7	27.97	248	17.2	1.76	3.21	10.11	10.32
108	27	1.2	3	53	174	17.5056	2	1	0	1	1	1	0	1	1.55	4.96	15.56	7.7															2.99	4.1	13.93	11.07	10.6	9.8	2.25	5.2	8.7	7.4	3.67	365	16.3	3.08	3.93	13.49	11.25
109	34	2020-01-11	2	57	170	19.7232	3	1	0	0	1	0	2	1	6.24	5.05	14.67	21.85	18.4	9.2				2.29									4.59	4.61	16.27		19.9	8.7	2.27	5.3	7.2	6.1	29.42	744	18	4.54	3.6	16.47
110	26	1.13	2	48	160	18.75	1	1	0	0	0	2	2	1	0.626	5.26	21.66	10.4	22.1	14.5				2.36					0.94	3.45	1.37	1.58	1	4.47	15.45	8.98	21.9	9.5	2.28	4.7	9.4	8	19.83	570	16.7	1.49	4.22	15.21	10.05
111	30	2020-02-06	1			21.649	1	3	0	0	0	0	0	1	0.673	4.33	17.57	8.94															2.47	4.07	11.33		11.3	9.2	2.15	5.5	10.9	7.7	10.17	355	17.8	2.35	3.16	12.88
112	27	2020-02-03	2	48	155	19.9792	2	1	0	0	0	1	0	1	10.14	4.65	12.89	414.5															0.15	4.33	16.29		26.7	7.6	2.18	4.8	8.6	5.5	18.65	360	＞20	1.46	3.37	13.41
113	34	2020-01-27	1	47	165	17.2635	1	2	0	1	0	2	0	1	0.657	3.85	17.58	12.41															1.52	3.4	13.38		20.7	9.4	2.21	4.7	6.7	7.5	9.21	850	19.5	1.5	3.04	14.05
114	32	2020-02-01	2	52	155	21.6441	3	2	0	0	0	0	2	1	1.01	4.74	15.91	7.23															2.1	3.53	11.51		13.2	9.7	2.19	5	8.2	6.2	18.22	396	10.1	3.98	3.81	12.29	10.92
115	33	2020-02-03	1	58	160	22.6562	2	3	0	0	0	2	0	1	3.05	4.39	11.71	8.56															4.09	3.49	9.98					4.9	8.6	6.7	12.26	434	4.1	1.34	3.19	12.22
116	38	2020-02-12	2	65	166	23.5883	3	2	0	0	0	2	2	1	0.933	5.52	16.77	9.73	29.2	9.8				2.31									1.02	4.13	11.08		24.4	9.1	2.16	5.8	10.7	8	18.11	257	15	1.07	3.3	11.86	10.99
117	27	2020-02-17	2	67.5	168	23.9158	2	2	0	0	0	2	2	1	2.74	4.33	17.58	6.28															4.58	4.19	13.37		18.9	10.1	2.22	4.7	10	7	24.54	361	17.2	4.46	3.06	14.16
118	28	2020-03-09	3	55	168	19.487	2	1	0	0	0	2	2	1	1.3	5.17	16.12	5															1.54	3.91	11.39		16.3	8.3	2.31	5.2	7	6.5				1.52	3.95	12.01	8.01
119	28	2020-03-06	3	60	160	23.4375	2	1	0	0	0	2	2	1	0.857	5.17	19.01	5.75	30.1	11.5				2.4					0.78	4.39	1.32	2.51	0.761	3.63	12.25		21.3	9.5	2.37	4.7	8.4	8	47.9	344	18.5	0.63	3.54	13.18	5.43
120	33	2020-03-14	3	52	163	19.5717	1	2	0	0	0	1	0	1	1.11	4.29	13.63	8.29															1.4	3.2	10.27		10.5	8.2	2.24	4.8	7.7	7.5	20.64	340	12	2.82	3.01	10.94	10.47
121	30	2020-03-15	2	56	168	19.8413	2	1	0	0	0	1	1	1	0.503	5.32	16.62																0.627	4.06	13.1	9.48	12.7	9.1	2.23	5.2	8.2	7.1	22.3	459	18.7	1.02	4.5	13.24	9.85
122	27	2020-03-28	3	63	172	21.2953	3	1	0	1	0	1	1	1	1.25	4.4	18.23	20.32															1.52	3.8	12.92	7.72	18.8	9.6	2.19				34	955	18.1	2.17	3.94	10.96	5.41
123	28	2020-03-31	1			21.649	1	1	0	0	0	0	0	1	1.25	5.78	21.44	8.52															0.645	3.95	14.18		15.8	9.7	2.23	5.5	8.6	6.6	12.93	335	＞20	0.586	3.92	14.61
124	30	2020-04-24	3	59	170	20.4152	3	1	0	1	0	2	2	1	2.7	4.45	15.23	107.7	20	12.3				2.12					0.42	3.41	1.43	1.78	2.12	3.11	13.48	74.76	19	8.5	2.21	4.3	9.4	10	15.17	663	17.5	2.4	3.15	11.95	57.62
125	24	2020-05-08	3	75	160	29.2969	3	1	0	0	0	2	0	1	5.72	4.59	13.05	7.68															1.02	4.25	12.02		13.3	11.1	2.28	5.6	7.9	5.9				0.907	4.17	9.95
126	29	2020-05-06	3	52.5	162	20.0046	3	1	0	0	0	2	2	1	2.06	4.31	15.71	10.28															1.79	3.9	13.91		15.7	12.3	2.28	5.4	10.8	7.2	11.3	186	15.7	2.41	4.06	14.05	12.73
127	26	2020-06-18	3	58	164	21.5645	2	1	0	1	1	2	0	1	1.41	4.8	16.22	5															2.05	4.13	15.87	11.34	6.4	10.9	2.12	4.5	4.3	4.1	19.02	294	17.2	1.98	3.81	12.54	12.12
128	24	2020-06-21	2	55	163	20.7008	2	1	0	0	0	2	2	1	2.69	5.19	17.38	16.81															2.09	4.14	14.07	25.72	14.6	10.1	2.12				14.11	242	12.6	1.57	3.91	13.49	21.51
129	24	2020-07-19	1	49	165	17.9982	1	1	0	0	0	2	2	1	1.66	5.17	17.24	8.76	18.9	13.5				2.39					0.98	3.46	1.63	1.56	1.91	4.36	15.01											2.3	3.85	11.91	9.32
130	28	2020-08-16	2	48	158	19.2277	3	1	0	0	0	1	1	1	2.28	4.78	17.14	9.38															2.2	4.11	12.79	9.15	12.6	9	2.18	4.5	7.5	6.3				3.49	4.07	10.48
131	25	2020-08-24	2	55	159	21.7555	1	1	0	0	0	2	2	1	3.96	4.98	15.56	9.83	18.4	11.3				2.3					0.86	4.29	1.4	2.48	4.86	4.06	11.1	10.66	8.3	8	2.07	4.9	10.1	7.5	12.77	298	14.5	3.49	3.47	12.01	5
132	28	2020-08-25	2	58	168	20.5499	3	2	0	1	0	2	2	1	1.26	4.93	22.36	11.81	19.5	12.4				2.25					1.25	4.28	1.44	2.37	4.02	3.71	14.47	10.03	8.9	9.8	1.86	4.9	8.3	6.1				2.6	3.91	13.76
133	28	2020-08-20	2	60	160	23.4375	1	1	0	1	0	1	1	1	4.18	5.02	16.9	8.84															0.98	3.98	11.9	6.64	10.3	8.8	2.16	5.3	5.5	7.9	3.69	282	17.9	1.92	3.77	13.42	5.77
134	31	2020-09-11	2	55	163	20.7008	2	1	0	0	0	2	2	1	0.948	4.69	17.16	18.99	15.3	11.1				2.26									2.49	3.91	11.11	7.92	10.4	7	2.13	4.9	8	5.9				1.94	3.81	10.81
135	30	2020-09-23	3	48	168	17.0068	3	1	0	0	0	2	0	1	2.24	4.87	17.17	9.31	17.4	17.5				2.45					0.7	2.58	1.46	0.93	3.28	4.23	13.04	13.87	17.9	10.9	2.35	4.2	5.4	6.5	4.47	297	＞20	3.32	4.84	14.38
136	35	2020-09-25	3	67	165	24.6097	3	2	0	0	0	1	1	1	1.56	4.27	16.48	8.31	27.3	10.4				2.19					0.76	3.57	1.56	1.73	1.14	3.4	13.1	12.82	17.6	8.9	2.11	5	10.2	7.1	22.35	378	18.4	0.909	3.51	14.51	8.89
137	29	2020-10-03	3	49	164	18.2183	2	1	0	0	0	1	0	1	4.37	3.47	13.3	6.37															3.61	3.24	13.98	6.6	16.7	8.8	2.18				36.18	228	18.9	4.05	3.83	14.39	6.24
138	37	2020-09-26	3	54	174	17.8359	3	2	0	0	0	2	2	1	0.299	4.2	17.44	10.07															0.989	4.06	14.33	10.08	12.7	10.2	2.18	4.7	6.1	5.5	8.67	476	13.8	0.722	3.64	12.98	12.35
139	35	2020-10-13	3	57	158	22.8329	3	1	0	0	0	2	2	1	1.76	4.91	16.78	140.6															1.38	3.61	9.98	85.09	18.9	8.7	2.11	4.5	8	7.3	30.77	362	17.4	1.1	3.94	10.36
140	31	2018-10-06	2	54	160	21.0938	2	2	0	0	0	1	2	1	3.32	5.31	15.44	317.5	20.9	12				2.38					1.18	4.44	1.33	2.73	2.46	4.2	12.78		21.2	7.9	2.15	4.9	8.7	6.6				2.44	3.66	10.24	17.43
141	31	2018-10-08	3	63	159	24.9199	3	1	0	0	0	1	1	1	1.1	4.59	17.85	11.73						2.22									0.983	4.15	11.84	15			2.12	4.5	4.9	5.9				0.851	4.06	11.88	17.03
142	22	2018-09-27	1	53.5	164	19.8914	1	1	0	0	0	2	2	1	0.799	4.43	17.55	8.53															1.53	4.42	14.33				2.33	4.3	8.2	8.2				1.5	3.85	13.15	6.87
143	27	2018-10-12	2	53	164	19.7055	3	1	0	0	0	2	0	1	2.13	3.98	16.47	17.88															2.64	4.17	14.99	14.52			2.23	4.5	5.4	5.8				2.68	3.68	15.39	21.17
144	25	2018-10-14	2	42	155	17.4818	2	1	0	0	0	2	0	1	2.7	4.78	16.34	9.14															3.39	4.61	14.26				2.19	4.2	5.5	5	8.78	320	6.5	4.33	4.35	13.9	14.33
145	31	2018-10-13	3	58	162	22.1003	2	1	0	0	0	1	0	1	4	5.71	18.94	62.48						2.49									2.61	3.9	14.26				2.23	4.8	7.5	7.8				2.63	3.55	12.34
146	27	2018-10-12	2	55	155	22.8928	3	1	0	0	0	2	2	1	3.34	4.44	16.16	17.04						2.33									1.25	4.83	12.5				2.28	4.4	7.9	7.2				1.6	4.3	11.89
147	30	2018-10-16	3	56	155	23.3091	1	1	0	0	0	1	1	1	0.795	5.92	20.74	8.27															1.08	4.62	14.4				2.17	4.6	7.8	6.3				0.871	3.9	13.14
148	25	2018-11-17	3	53	162	20.1951	2	1	0	0	0	1	1	1	2.31	5.2	18.1	9.73															2.35	4.36	12.44				2.33	4.4	6.4	6.4	47.28	317	16.6	1.9	4.11	12.15	16.04
149	29	2018-10-15	3	53	158	21.2306	3	1	0	0	0	1	1	1	3.5	4.91	18.33	74.29	12.4	13.1				2.37					0.44	3.88	1.78	1.76	1.68	4.57	14.43		31.9	10.7	2.27	4.2	6.6	5.7				2.15	4.51	10.95	32.51
150	29	2018-10-13	3	46	158	18.4265	3	1	0	0	0	1	2	1	0.912	4.45	20.49	8.03						2.39									2.98	4.2	13.43				2.25	4.4	6.6	6	17.35	389	17.8	2.66	4.05	12.82
151	26	2018-10-14	3	45	165	16.5289	3	1	0	0	0	1	1	1	0.841	4.89	16.47																1.82	4.09	13.09					5	6.7	6				0.512	4.12	11.83	54.85
152	33	2018-10-15	1	60	158	24.0346	2	2	0	0	0	1	0	1	5.31	4.51	14.51	7.85															3.27	4.32	11.37		11.1	8.6	2.25	4.7	9.3	7.3				2.92	3.79	11.15	7.28
153	27	2018-10-21	3	55	165	20.202	3	2	0	0	0	1	2	1	3.19	4.22	13.13	9.81															3.3	4	10.98		20.8	10	2.06	4.6	7.5	6.6	8.65	367	13.4	1.86	3.98	11.57
154	25	2018-10-15	2	58	165	21.3039	2	1	0	0	0	2	0	1	2.04	5.23	19.29	10.12						2.33					0.59	3.27	1.33	1.66	3.53	3.69	11.97				2.11	4.7	6.2	6.2	3.94	156	14.8	3.53	3.48	12.79
155	40	2018-10-15	2	48	168	17.0068	2	1	0	1	1	2	2	1	3	3.53	14.67	23.47															2.54	4.39	12.91		19.7	8.6	2.19	4.2	5	5.6				6.42	4.84	11.74
156	27	2018-10-28	3	59	167	21.1553	3	1	0	0	0	1	2	1	3.29	5.04	20.61	9.2	18.1	14.6				2.27									3.08	4.96	15.7	16.3	17.7	10.3	2.34	4.1	8.7	7.3	23.64	350	16.8	3.34	4.36	14.37
157	31	2018-10-20	3	44	158	17.6254	3	1	0	0	0	1	1	1	0.579	4.28	16.4	11.51															2.21	4.16	13.31				2.26	4.9	5.4	5.5				1.8	3.67	12.2	13.57
158	29	2018-10-25	3	67	166	24.3141	3	2	0	0	0	2	0	1	2.59	4.21	16.62	8.53															2.23	4.01	13.19											3.01	3.95	13.06
159	32	2018-10-22	3	57	161	21.9899	3	1	0	0	0	1	1	1	6.11	3.34	14.29	5.81															7.93	4.13	17.5		15.4	8.5	2	4.4	5.8	5.3				3.35	3.57	15.22	7.36
160	33	2018-10-20	3	55	158	22.0317	2	2	0	0	0	2	2	1	3.03	3.61	14.4	25.47						2.3					1.08	4.02	1.63	1.98	2.31	3.28	11.82				2.07	4.3	7.1	7.3				2.61	3.29	10.25
161	26	2018-11-21	3	66	166	23.9512	1	1	0	0	0	1	1	1	1.28	5.05	16.87	27.74															1.7	5.12	13.71					4.5	6.4	5.9				1.4	5.44	15.02	20.57
162	31	2018-10-19	2	62	163	23.3355	2	2	0	0	0	2	0	1	0.516	5.1	18.76	5						2.23									1.97	5	13.38				2.25	4.9	7.2	6.5	9	183	15.8	1.64	4.56	13.75
163	30	2018-10-14	3	60	163	22.5827	3	2	0	0	1	2	2	1	1.91	5.38	15.7																1.92	5.22	13.12		20.1	11.1	2.13	4.6	6.8	6.2				2.86	5.21	11.56
164	26	2018-10-26	3	50	160	19.5312	3	1	0	0	0	2	2	1	2.85	5.08	15.29	5.11	12	13.8				2.35					1.18	5.03	1.83	2.59	2.68	4.24	10.84		10.6	9.4	2.1	4.3	6.5	6.3				2.48	3.85	11.6	5
165	27	2018-10-25	2	65	159	25.711	2	2	0	0	0	1	2	1	1.17	4.14	14.81	6.2															1.63	4.49	14.06				2.14	5.1	9.8	7.4	12.74	209	17.9	1.82	3.83	13.3
166	29	2018-10-26	3	58	155	24.1415	3	1	0	0	0	2	0	1	3.56	5.07	15.8		17.9	13.3				2.22					2.8	3.8	1.13	2.14	2.07	4.46	10.88		15.5	10.9	2.2	4.4	8.8	7.4	9.71	159	12.8	2.83	4.53	11.71
167	30	2018-10-28	2	61	163	22.9591	3	1	0	0	0	0	2	1	2.51	4.06	13.51	6.48															2.29	4.33	11.77				2.25	4.8	7.4	6.4	6.62	312	6.3	3.12	3.29	10.9	7.38
168	25	2018-10-25	3	65	170	22.4913	3	1	0	0	0	1	0	1	1.08	4.49	16.34	10.53	10.9	11.9				2.27									1.91	4.56	11.8		10.7	7.7	2.13	4.5	8.2	6.5				2.52	4.02	12.38	11.78
169	31	2018-11-05	3	52	162	19.8141	2	1	0	1	0	1	0	1	7.99	5.64	16.99	10.16						2.15									2.01	4.86	14.12				2.11	4.6	8.3	8.4	7	255	17	1.73	4.51	12.9
170	25	2018-10-22	1	58	168	20.5499	3	1	0	0	0	1	1	1	2.02	5.05	17.9	14.08						2.32									0.937	4.62	17.46	13.18	16.3	7	2.13	4.7	7.8	5.8				0.991	4.15	14.51	11.43
171	24	2018-11-01	2	50	160	19.5312	2	1	0	0	0	1	0	1	3.15	5.48	16.68	8.53															2.41	4.12	13.22		7.8	10.5	2.11	4.8	6	6.3	7.85	213	14.3	2.17	3.89	13.09
172	28	2018-10-31	3	70	168	24.8016	3	1	0	0	0	2	2	1	1.59	5.47	17.75	8.31	17.9	12.7				2.14					0.88	3.65	1.2	2.14	1.83	4.73	14.61		24.6	10	2.1	4.4	7.9	6.4				1.16	4.81	14.63	15.96
173	25	2018-10-30	2	58	158	23.2335	2	1	0	0	0	1	2	1	2.74	4.7	13.61	8.19	21.1	12.9				2.35					0.68	3.76	1.2	2.17	2.4	4.22	12.37		11.2	8.1	2.11	4.2	7.3	6.9				2.76	4.29	12.09
174	24	2018-11-03	1	67	171	22.913	2	1	0	0	0	1	0	1	1.46	4.01	14.49	13.47															2.48	3.83	11.19		8.6	9.3	2.17	4.1	7.7	6.3	10.03	294	18.2	3.3	3.56	11.58
175	24	2018-11-05	3	56	168	19.8413	3	1	0	0	0	1	2	1	1.82	4.63	15.95	9.79															1.8	3.85	13.77				2.22	4.2	7.6	6.6	15.23	277	16.2	4.09	3.68	12.44	12.07
176	26	2018-11-10	3	48	162	18.2899	3	1	0	0	0	2	0	1	0.985	4.7	17.58	13.57	22.5	16.9				2.3									0.86	3.96	11.38		26	9.3	2.2	4.3	6.3	5.5	16	113	7.9	2.62	3.76	12.07
177	30	2018-11-07	2	65	167	23.3067	3	1	0	0	0	1	0	1	2.53	5.46	15.18	9.83															2.7	5.26	11.37					4.7	7	4	17.95	297	16.3	2.72	4.22	11.42	14.41
178	30	2018-11-02	3	55	160	21.4844	3	1	1	0	0	1	0	1	3.45	4.8	17.11	19.96															3.5	4.41	11.32	22.58	10.6	12.3	2.24	5	7.4	7.7				3.09	4.71	11.95
179	25	2018-11-03	1	56	166	20.3223	2	1	0	1	0	2	0	1	1.98	4.97	21	11.26	13.7	15				2.25					0.62	3.64	1.57	1.71	3.42	4.38	15.22		12.8	11.1	2.23	4.4	6.5	5.3				3.6	3.76	14.57	11.96
180	31	2018-11-06	3	63	158	25.2363	2	1	0	0	0	1	0	1	3.37	4.56	17.08	19.08															1.91	4.57	12.17		10.7	9.7	2.22	4.3	8.3	7.7	6.94	145	17	2.4	3.87	11.91	39.42
181	27	2018-11-16	3	59	167	21.1553	3	1	0	0	0	1	1	1	3.44	5.24	17.41	214.5															2.27	4.3	14.98				2.15	4.3	6.5	5.7	40.39	625	17.2	2.74	4.09	13.78	58.45
182	28	2018-11-11	3	75	159	29.6665	3	1	0	0	0	1	1	1	2.34	4.49	15.19	175.2															2.35	4.56	13.1		13.2	9.4	2.14	4.4	6.4	5.3	9.99	176	16.7	2.88	4.14	14.4
183	24	2018-11-01	2	66	165	24.2424	2	1	0	0	0	1	1	1	3.75	4.87	14.8	9.93															2.72	4.21	9.84	16.41			2.23	4.7	5.9	6.4	19.27	153	14.8	3.37	3.6	9.83	13.31
184	28	2018-11-14	3	47	159	18.591	1	1	0	0	0	2	0	1	2.12	4.24	15.35	5															3.97	3.7	11.72		7.8	8.3	2.08	4.5	8.5	6.4	5.02	207	13.6	3.35	3.44	12.06
185	32	2018-11-21	3	67	161	25.8478	3	2	1	0	0	1	0	1	2.78	3.84	13.14	6.11															1.72	4.49	10.81		26.2	10.9	2.19	4.8	8.1	7.7	9.26	100	15.2	1.82	4.6	10.44	8.4
186	28	2018-11-10	2	64	158	25.6369	2	1	0	0	0	1	1	1	0.526	4.59	15.66	10.59						2.26					2.86	4.83	1.76	2.49	0.827	3.99	11.23		15.6	9.8	2.27	4.8	7	6				1.04	3.79	11.18	9.91
187	26	2018-11-10	3	47	169	16.456	3	1	0	1	0	1	0	1	2.25	5.02	18.93	131.1						2.33					1.3	4.69	1.69	2.61	2.08	4.25	14.08	49.99			2.18				8.3	428	15.1	3.2	4.69	15.02	33.36
188	28	2018-11-16	3	60	163	22.5827	3	1	0	0	0	2	0	1	3.21	4.3	18.8	9.76															2.66	3.99	15.37		11.2	10.1	2.18	4.3	6.9	5.2	8.46	321	13	2.28	3.89	13.99
189	30	2018-11-22	3	63	161	24.3046	3	2	0	0	0	1	1	1	1.57	4.7	16.52	19.04															1.43	4.62	14.6		11.6	9.4	2.11	4.4	7.4	5.8	13.89	494	16.1	1.84	3.96	14.21
190	29	2018-11-27	1	54	165	19.8347	3	2	0	0	0	1	1	1	1.65	4.66	14.72	22.08															1.61	4.16	11.66		9.2	8.8	2.05	4.7	7.5	7.5	4.7	345	16.4	2.05	3.69	11.3
191	28	2018-11-23	2	52	160	20.3125	2	1	0	0	0	1	1	1	0.585	5.15	15.47	12.5															1.03	4.06	11.65	11.26	16.2	11.1	2.19	6.2	9.1	8				1.46	3.87	11.41
192	31	2018-11-16	1	61	156	25.0657	2	2	0	0	0	2	0	1	2.07	4.66	17.7	16.8															1.43	3.44	10.49		9.2	8.7	2.06	4.7	7	7.3	10.29	186	5.5	1.72	3.5	11.81	5.46
193	26	2018-11-14	3	57	170	19.7232	2	1	0	1	0	1	2	1	3.11	5.51	17.3	25.68															2.4	4.48	14.25		15.3	10.9	2.14	5.2	9.1	7.7	9.9	289	12.5	1.91	4.34	14.54
194	26	2018-11-22	3	54	160	21.0938	3	1	0	0	0	2	2	1	1.93	5.56	18.06	8.27	13.1	12.5				2.29									2.65	4.49	12.69		6.9	6.6	2.18	4.8	8.1	6.5	10.58	171	11.6	2.15	4.47	11.73
195	30	2018-11-26	2	52	160	20.3125	3	1	0	0	0	1	0	1	6.4	5.21	16.68	9.34						2.37									2.99	4.5	13.26		15.7	8.3	2.2	4.1	4.9	4.9	18.85	178	17.3	3.73	4.3	13.94
196	32	2018-11-23	3	66	155	27.4714	1	1	0	0	0	1	1	1	2.12	4.73	16.26	6.83	16.5	13.6				2.25					1.17	4.35	1.37	2.59	1.02	4.73	11.52		10.9	10.8	2.15	4.8	9.2	9.7				0.973	3.75	10.68
197	25	2018-11-23	3	50	163	18.8189	3	1	0	0	0	1	2	1	2.09	5.77	18.42	5.44	7.1	14.4				2.46									1.85	4.4	15.05		13.6	11.4	2.3	4.7	5	6.5	16.45	452	16.5	2.85	3.98	15.17
198	27	2018-11-26	3	80	175	26.1224	2	1	0	0	0	2	2	1	9.8	4.87	15.21	258.3															3.55	4.03	13.96				2.23	4.9	7.4	6.2	9.47	183	17.6	2.63	4.04	12.84	100.3
199	35	2018-11-23	3	75	158	30.0433	3	2	0	0	0	2	2	1	1.52	4.84	18.25	7.09						2.29									1.82	4.29	14.2		7.8	9.7	2.11	5	9.8	6.3	4.46	198	14.6	1.81	3.89	14.68	9.38
200	27	2018-11-12	2	50	160	19.5312	3	1	0	0	0	2	2	1	2.24	4.59	15.14																2.08	4.1	13.39				2.23	4.5	6.3	5.8	12.19	185	4	3.65	4.09	13.65	13.14
201	30	2018-11-25	3	55	163	20.7008	1	1	0	0	0	2	2	1	2.59	4.45	17.05	11.83															3.48	3.89	13.41		7.4	7.6	2.09	4.2	5.3	5.8				5.88	3.84	13.73
202	27	2018-12-14	1	56	151	24.5603	2	1	0	0	0	1	0	1	2.99	5.02	16.8	25.61	8.9	13.2				2.26									3.09	4.68	14.2		10.6	9.2	2.19	4.1	6	5.2	25.03	259	13.8	3.99	4.72	13.83
203	24	2018-11-18	1	62	153	26.4855	2	2	0	0	0	1	1	1	3.03	4.33	14.04	14.47															2.98	4.53	13.55		6	7.5	2.12	4	8.1	6.4	3.85	198	7.7	2.72	4.4	11.83
204	28	2018-11-18	3	47	163	17.6898	2	1	0	0	0	1	0	1	0.384	5.24	16.97	5															1.51	4.4	14.08		12	8.8	2.1	4.4	7.2	6.4	10.04	110	7.9	2.48	3.97	15.59	9.54
205	25	2018-11-26	2	50	160	19.5312	2	1	0	0	0	1	1	1	1.14	5.06	21.44	6.78						2.26									3.18	3.68	13.05		30.3	9.9	2.22	4.6	5.8	5.4	25.49	208	18.6	3.03	3.65	14.95
206	27	11003159	2	55	160	21.4844	3	1	0	0	0	2	0	1	5.03	3.94	15.15	6.82	20.7	12				2.26					0.81	6.36	2.47	3.3	2.77	4.6	17	10.86	10.8	9.9	2.07	4.8	8.4	6.4	8.61	255	15.9	2.23	3.85	12.73	7.66
207	23	2018-11-24	2	67	162	25.5296	1	1	0	0	0	2	2	1	3.18	4.74	15.59	11.87															5.02	3.64	9.62				2.21	5	4.8	6.9	44.85	226	15.2	3.7	3.27	9.55	12.22
208	37	2018-11-29	1	54	162	20.5761	1	2	1	0	0	1	2	1	2.66	4.69	17.7	6.95						2.24									1.9	4.21	12.01		30.3	8.9	2.05	4.8	9.1	8.7	14.36	308	12.2	2.48	3.54	11.98
209	27	2018-11-27	3	48	163	18.0662	3	1	0	0	0	2	0	1	1.94	4.45	15.41	6.54															3.22	4.29	13.39		19.6	10.2	2.37	4.5	6.3	5.3				3.43	3.99	13.75
210	28	2018-11-29	3	43	163	16.1843	3	1	0	0	0	2	2	1	1.18	5.67	22.91	6.19	22.2	16				2.38									2.27	4.45	11.64		12.2	8.1	2.12	4.3	6.6	5.8				2.05	4.48	11.9	8.4
211	24	2018-11-28	2	53	160	20.7031	1	1	0	0	0	2	2	1	10.7	4.2	15.36	5															1.29	4.57	17.5				2.09	4.2	6.4	5.5	14.3	204	16.7	1.89	4.14	14.29	11.9
212	26	2018-12-21	3	46	165	16.8962	1	1	0	0	0	2	2	1	4.14	4.61	16.18	10.9															4.52	4.21	16.78				2.15	4.4	6.5	7.3	30.9	408	19.6	4.77	4.28	18.36
213	30	2018-11-25	3	49	158	19.6283	3	1	0	0	0	2	2	1	1.86	4.92	14.81	6.65															2.52	4.47	12.71	16.12	16.2	10.4	2.21	4.2	5.4	7.5				0.557	3.29	11.47	5.77
214	32	2019-02-23	1	40	162	15.2416	1	2	0	0	0	0	0	1	1.96	5.55	15.15	5.24	11.2	10.8	0.8	1.54	25.6	2.25									4.67	4.33	11.14		12.2	10.9	2.2	4.4	6.7	4.9	12.35	176	5.4	5.4	3.82	11.51
215	23	2019-02-21	2	57	160	22.2656	3	1	0	1	0	1	1	1	6.25	5.22	16.09	138	11.5	16				2.37									1.79	3.93	15.71		12.7	10.7	2.18	4.7	5.7	6.5	65.8	469	19.3	3.03	3.88	13.54
216	24	2019-03-18	3	59	163	22.2063	2	1	0	0	0	1	0	1	1.09	4.76	14.23	6.31															1.92	4.92	14.93				2.32	4.4	12.1	11.4	27.57	343	＞20	1.8	3.66	13.94	8.26
217	26	2019-02-22	2	42	155	17.4818	2	1	0	0	0	1	0	1	2.12	5.44	16	9.65	25.5	13.3				2.28									2.58	3.73	12.26	11.68	19	8.2	2.15	4.3	7.3	5.8				1.74	3.76	12.06
218	35	2019-02-17	3	58	158	23.2335	1	1	0	0	0	1	0	1	0.005	6.16	18.91	9.72						2.3									0.762	4.5	11.64				2.08	4.1	6.8	4.8	20.43	392	16.3	0.783	3.68	12.55
219	32	2019-02-24	2	63	167	22.5896	3	2	0	1	0	2	0	1	4.33	4.7	15.71																4.31	4.2	15.26		18.5	9.5	2.19	4.8	8.8	6.3	10.5	448	5.5	2.94	4	12.87
220	30	2019-03-04	3	44	160	17.1875	2	1	0	0	0	1	2	1	0.177	9.91	24.53	16.97															3.32	4.84	11.57		12.1	10.6	2.2	5	7	6.4	20.43	311	11.4	1.59	4.29	11.04	12.26
221	26	2019-03-08	3	55	163	20.7008	3	1	0	0	0	2	2	1	1.41	5.14	16.91	13.49	22.6	13.1				2.29									0.885	4.03	13.87		33	9.2	2.21	4.4	7.2	5.7	16.61	281	18.3	1.24	3.25	13.26	5.46
222	27	2019-03-30	2	65	172	21.9713	3	1	0	0	0	1	1	1	2.39	5.12	16.08	13.25	28.4	11.9				2.32					0.83	4.39	1.47	2.37	2.71	4.36	15.72		19	7.1	2.15	4.3	10.4	8.2	29.12	301	17.5	2.88	3.88	11.84
223	29	2019-03-28	2	58	157	23.5304	2	1	0	0	0	1	0	1	2.39	6.14	21.5	9.83	21.8	14.9				2.29					0.44	3.48	1.35	2.01	2.69	4.23	16.36		11.7	9	2.17	4.3	6.7	6.7	5.73	390	16.4	2.7	4.05	13.84
224	25	2019-03-23	3	45	165	16.5289	1	1	0	0	0	2	2	1	1.99	5.65	17.6	10.54	15.3	11.5				2.31					0.68	3.23	1.33	1.76	1.88	3.29	18.96		18.8	9.4	2.29	4.3	7.9	6.3	45.63	220	19.2	3.79	3.36	17.3
225	28	2019-04-04	2	52.5	160	20.5078	2	1	0	0	0	1	0	1	3.42	5.17	15.72	6.72															3.75	4.01	12.56		11.5	9.2	2.19	4.7	8.4	7.1				3.73	3.97	10.88
226	28	2019-04-07	2	50	158	20.0288	1	1	0	0	0	1	0	1	3.74	5.34	16.63	30.6															2.94	3.96	14.19		17	9.2	2.21	4.2	6.9	5.9	18.24	357	16.8	3.98	4.51	12.87
227	27	2019-04-08	3	70	170	24.2215	2	1	0	0	0	1	0	1	1.86	6.41	15.96	7.94															1.91	4.13	14.08		17.3	10.8	2.27	4.6	6.9	7.4	26.46	264	18.4	5.18	5.02	12
228	24	2019-04-11	3	53	165	19.4674	3	1	0	1	0	2	2	1	0.618	4.91	19.64	12.14															0.713	3.49	17.47		12.8	9.4	2.27	4.3	8.8	7.7				1.22	3.89	15.66
229	28	2019-04-30	2	52	160	20.3125	2	1	0	0	0	1	0	1	1.19	4.91	17.69	12.59															2.64	3.9	13.72				2.27	4.7	8.7	6.1	11.36	365	20	2.83	3.77	12.42	15.28
230	29	2019-05-12	3	53	161	20.4467	3	2	0	0	0	2	2	1	1.77	4.64	18.11	23.74															0.898	3.88	15.61		15.2	8.3	2.09	4.3	6.7	5.2	16.04	423	14.1	0.624	3.76	15.24
231	27	2019-04-16	3	54	160	21.0938	3	1	0	0	0	2	2	1	0.722	4.54	18.11	8.26															0.738	4.13	14.01		16.8	9.4	2.1	4.9	6.3	6.7	17.05	368	17.4	1.15	4.67	12.68
232	27	2019-04-13	3	52	161	20.061	3	1	0	0	0	1	1	1	4.46	4.92	15.18	28.8											0.72	4.01	1.42	1.99	2.36	3.68	15.16		13.4	9.2	2.38	4.7	9.6	6.8	10.49	281	10.2	2.62	3.53	13.9
233	33	2019-06-02	3	61	162	23.2434	3	1	0	1	0	1	2	1	3.66	4.78	15.29	5.01															2.08	4.1	11.71		9.6	11.7	2.22	4.8	6.9	6.4	5.82	413	14.8	0.881	5.23	11.61	10.02
234	28	2019-05-22	2	48	165	17.6309	2	2	0	0	0	2	0	1	2.2	4.48	17.69																4.42	3.5	10.55		12.5	8.2	2.2	4.2	8.2	7.2				3.94	63.97	8.93
235	25	2019-05-27	2	61	159	24.1288	1	1	0	0	0	2	0	1	1.44	5.08	18.06	5.04															2.51	3.62	11.53		13	10	2.22	4.6	10.4	8				1.38	4.14	13.31	12.06
236	24	2019-05-24	3	52	166	18.8707	2	1	0	0	0	2	2	1	2.5	5.59	20.02	12.94															2.12	4.79	13.77		21.1	8.8	2.22	4.3	7.8	7	24.85	334	18.2	1.86	4.53	14.69
237	32	2019-05-29	3	60	164	22.3081	3	2	0	0	0	2	0	1	2.12	4.83	16.95	7.33															1.56	4.88	12.31		19.1	8.6	2.17	4.4	8	6.3	15.44	269	13.7	1.67	3.81	10.81
238	28	2019-05-28	3	49	157	19.8791	3	1	0	0	0	1	0	1	1.99	5.99	17.68	10.81	28.4	13.5				2.34					1.01	4.11	1.57	2.33	1.47	4.85	13.37	17.7	23.2	10.9	2.29	3.9	7.8	7.3				3.78	4.56	12.17	15.11
239	25	2019-06-30	2	72	167	25.8166	2	1	0	0	0	2	0	1	4.51	5.23	13.9	10.63															4.43	4.58	10.88		9.1	10.7	2.36	4.4	8.3	6.9	7.21	270	16.9	5.14	4.58	10.11
240	36	2019-06-02	3	60	156	24.6548	2	2	1	0	0	2	2	1	4.36	5.03	16.59	45.29						2.21					1.05	4.15	1.27	2.32	3	4.04	12.96				2.14	4.3	6.8	5.5	16.81	352	13.5	4.84	3.68	11.99	16.52
241	25	2019-06-06	3	50	158	20.0288	1	1	0	0	0	0	2	1	2.16	4.72	18.92	6.75	15.4	10.6				2.24					0.69	3.66	1.44	1.98	2.36	4.18	14.71	8.88	29.8	8	2.17	4.4	6.5	5.8				5.47	4.32	12.61	15.21
242	26	2019-06-25	3	47	157	19.0677	3	1	0	0	0	2	2	1	2.83	5.17	16.82	6.24															4.54	4.29	13.53		11.9	10.6	2.13	4.5	6	5.5	5.18	354	11.3	2.13	4.09	15.75	11.64
243	28	2019-06-18	2	54	158	21.6311	1	1	0	0	0	2	0	1	3.59	5	15.88	8.86															3.1	3.94	12.57				2.26	4.9	8	7.1	68.92	196	7.6	3.68	3.62	12.12
244	26	2019-06-06	1	53	160	20.7031	2	2	0	0	0	0	2	1	1.32	4.47	14.45	9.58															2.89	4.16	12.78				2.24	4.6	8.3	7.8	10.56	409	11.4	1.9	4.11	12.04	14.85
245	26	2019-06-06	1	75	162	28.578	2	1	0	0	0	2	0	1	3.78	4.99	14.81	9.65						2.27					0.88	4.32	1.26	2.81	3.53	4.94	12.85				2.25	4.4	6.8	6.7	11.09	110	8.1	2.82	5	11.58
246	29	2019-06-07	3	59	164	21.9363	3	1	0	0	0	1	1	1	1.9	4.09	15.55																3.42	3.68	12.23				2.2	4.5	9	7	2.98	318	16.5	3.34	3.74	11.81
247	28	2019-06-10	2	54	162	20.5761	2	1	1	0	0	2	2	1	1.56	4.72	19.97	5															2.98	3.69	14.69	5				4.6	8.9	5.8	41.51	467	18	2.65	3.66	14.8	7.91
248	25	2019-06-08	3	45	162	17.1468	2	1	0	1	0	2	0	1	1.86	4.7	18.61	11.27															1.99	4.35	12.84		25.6	9.6	2.25	4.2	6	5.2	13.86	328	19.3	3.37	4.22	11.32	11.42
249	29	2019-06-13	3	49	163	18.4425	1	1	0	0	0	2	2	1	2.78	3.78	16.09	8.92						2.29									2.8	4.41	12.96				2.17	4.5	8.9	7.8	14.14	361	19.7	3.03	3.68	10.82	7.61
250	31	2019-06-28	2	48	152	20.7756	3	2	0	0	0	2	0	1	0.866	4.54	16.4	24.27															3.73	3.44	10.25				2.23	4.5	7.1	8.1	3.12	251	11.7	3.1	3.09	9.79
251	23	2019-06-20	2	60	158	24.0346	2	1	0	0	0	1	0	1	1.52	5.54	16.56	5															5.61	5.9	9.7				2.25	4.6	8.6	4.9	26.89	267	17.7	3.92	6	12.21
252	28	2019-06-30	3	55	162	20.9572	3	1	0	0	0	1	1	1	1.73	5.44	15.02	7.54															2.85	4.67	11.88		14.4	7.6	2.19	4.3	8.1	6.3	11.47	120	15.4	4.35	4.66	11.5
253	30	2019-07-22	2	58	169	20.3074	3	2	0	0	0	2	2	1	1.36	4.78	15.84	10.74															2.41	4.01	14.19					4.3	9.4	8.6	13.46	434	17.4	2.56	3.35	11.93
254	29	2019-07-13	3	62	159	24.5243	2	1	0	0	0	1	0	1	2.04	5.4	16.07	7.48															2.99	5.24	12.93		20	8.4	2.28	4.7	7.3	6.4	9.59	253	14	3.96	3.88	9.71	7.74
255	25	2019-07-31	3	60	160	23.4375	2	1	0	0	0	2	0	1	2.52	5.61	19.31	9.31						2.5									2.75	3.84	13.99				2.24	4.7	7.9	7.2	19.8	215	17.2	2.45	3.35	12.92
256	29	2019-07-18	1	54	159	21.3599	1	1	0	0	0	2	0	1	1.65	4.64	16.07	9.28	13.9	10.9				2.28					0.63	3.99	1.58	2.05	1.38	4.35	10.82	12.1	5.6	7.5	1.98	4.9	8.7	6.5				2.11	4.3	8.59	14.02
257	31	2019-08-06	3	57	160	22.2656	3	2	0	0	0	1	0	1	0.798	4.71	19.44	8.09															2.21	4.34	14.23		20.9	9.1	2.15	4.9	6.4	6.5				1.45	4.01	12.61	8.37
258	29	2019-08-01	3	69	163	25.9701	3	1	0	0	0	2	0	1	0.787	4.86	14.65	8.43															2.5	4.25	9.82		11.8	7.8	2.2	4.7	7.5	6.7	8.19	268	15.4	2.39	3.97	10.32
259	25	2019-08-03	2	52	165	19.1001	3	1	0	0	0	1	0	1	3.87	5.56	19.14	10.12															2.56	5.01	11.47		13.9	10	2.17	4.2	6.7	5.7	7.69	225	17.3	3.17	4.42	10.27	8.61
260	29	2019-08-09	3	70	173	23.3887	2	1	0	0	0	0	2	1	3.7	5.13	18.37	8.66															3	4.31	12.38				2.26	5	6.7	6.7	24.84	287	＞20	1.55	3.31	12.23
261	32	2019-08-14	2	45	158	18.026	3	2	0	0	0	2	0	1	1.52	3.75	17.63	12.31	22.1	13				2.3									2.7	4.32	13.21	13.43	15.8	9.9	2.13	4.8	7.5	6.2				2.47	3.31	12.89	7.26
262	32	2019-08-16	2	47	164	17.4747	2	1	0	0	0	2	0	1	3.01	5.3	20.69	10.71															3.5	4.3	11.98		15.9	9.9	2.16	4.8	7.4	6.6	38.56	305	18.9	7.36	4.67	12.14
263	33	2019-08-20	2	59.5	160	23.2422	2	2	0	0	0	0	0	1	2.93	5.72	18.81	10.16						2.38					1.39	4.19	1.17	2.54	4.8	4.36	13.38		6.8	8.3	2.08	4.4	7.2	7				3.46	4.16	12.62
264	34	2019-08-28	3	54	165	19.8347	1	3	0	0	0	1	0	1	1.27	4.11	16.55	8.82															2.68	4.47	11.33				2.12	4.3	7.8	6.5	3.49	234	18.7	2.29	3.27	10.03	9.97
265	25	2019-09-09	3	57	158	22.8329	1	1	0	0	0	2	2	1	1.43	4.71	14.09	9.41															0.923	4.74	10.2				2.37	4.8	7	6.1	143.87	324	19.7	0.672	3.89	9.11	9.82
266	27	2019-10-02	3	46	158	18.4265	3	1	0	0	0	2	0	1	0.627	5.01	17.44	8.53															1.24	4.28	10.81				2.09	4.3	6.1	7.7	10.12	361	16.2	0.727	4.02	11.17	9.18
267	30	2019-09-21	3	55	157	22.3133	2	1	0	0	0	1	0	1	1.36	5.11	14.26																3.04	4.15	9.67				2.14	4.7	7.5	6.9	3.39	260	14.3	2.63	3.58	10.3
268	31	2019-09-20	3	56	155	23.3091	2	1	0	0	0	1	0	1	3.39	4.54	16.73	5						2.29									4.54	2.95	12.81				2.17	4.7	8.4	7.4	2.45	230	7.2	0.067	3.9	19.01
269	30	2019-09-16	2	63	158	25.2363	3	1	0	0	0	2	0	1	2.08	4.87	16.58	14.9															4.05	4.73	9.03		10.6	9.2	2.33	4.8	7.8	7.2	10.66	164	8.3	5.82	4.1	10.62
270	28	2019-09-30	3	53	158	21.2306	3	1	0	0	0	1	0	1	2.17	4.68	15.23	5															3.52	3.46	10.49		8.8	7.9	2.04	4.6	6.7	6.5				4.53	2.81	10.73
271	31	2019-10-19	3	54	160	21.0938	3	1	0	0	0	0	1	1	0.939	5.16	16.97	6.33	24.1	11				2.37					0.25	3.36	1.3	1.83	1.5	4.1	11.97		13.1	7.4	2.16	4.7	6.7	6.2	23.36	459	17.1	1.48	3.88	12.91	13.18
272	27	2019-10-06	2	64	168	22.6757	3	1	0	0	0	2	0	1	1.14	4.76	16.62	13.22															1.35	3.7	12.03				2.11	4.8	5.3	5.5	8.89	375	15.9	1.09	3.43	10.23
273	27	2019-10-08	3	48	160	18.75	2	1	0	0	1	2	0	1	2.28	4.69	16.15	7.22															2.79	3.7	10.95				2.14	4.8	8.8	7	18.82	320	16.8	2.67	3.33	11.68	7.15
274	25	2019-10-04	3	67	160	26.1719	2	1	0	0	0	1	0	1	2.6	5.62	16.06	9.72															2.16	4.37	11.09				2.21	4.6	7.7	6.7	5.06	252	15.4	2.18	3.96	10	7.32
275	27	2019-10-15	3	70	155	29.1363	3	1	0	0	0	2	2	1	1.7	5.71	14.78	15.18															3.28	4.68	11.59				2.16	4.2	4.8	6.5	2.4	245	15.5	3.87	5.4	10.67
276	25	2019-10-11	3	53	156	21.7784	3	1	0	1	0	2	2	1	2.17	4.99	16.19	35.27															3.53	4.92	11.49				2.21	4.7	6.9	6.2	21.94	473	19.2	1.58	4.47	11.3
277	29	2019-10-16	2	45	160	17.5781	1	1	0	0	0	2	2	1	0.683	4.67	16.19	8.41															1.89	4.22	10.25				2.08	4.4	6.4	6.5	8.86	257	18.4	1.69	2.7	10.04
278	38	2019-10-20	3	57	164	21.1927	3	1	0	0	0	2	2	1	1.64	5.3	16.69	10.42															1.65	4.17	10.88		20.4	9.8	2.18	5	8	6.9				0.96	3.87	9.48
279	28	2019-10-18	2	59	155	24.5578	3	1	0	0	0	1	0	1	0.053	4.97	22.76																3.4	3.82	11.6		13	10.4	2.28	5.2	9	6.6	10.76	390	17.9	3.82	3.69	14.72	9.31
280	27	2019-10-16	3	49.5	163	18.6307	1	1	0	1	0	1	2	1	2.24	5.61	18.71	11.47	20.8	13				2.41					0.74	3.47	1.26	1.94	2.85	3.75	11.07		13.7	10.1	2.25	4.4	7.4	5.8				3.38	3.52	13.75	11.58
281	29	2019-10-21	2	52	158	20.83	3	2	0	0	0	0	0	1	2.57	4.33	12.29	16.94															6.23	3.79	9.83				2.1	4.9	8.8	7.6	1.63	189	6.3	2.34	3.41	11.33
282	31	2019-10-31	2	55	163	20.7008	1	2	0	0	0	2	0	1	1.76	5.06	16.87	5.46															3.56	4.24	11.85				2.13	4.7	6.5	5.8	2.95	271	6.9	1.89	3.77	12.37	13.59
283	30	2019-11-06	3	55	160	21.4844	3	1	0	0	0	2	2	1	4.14	5.13	13.7	10.37															2.75	4.19	12.32		12.7	10.2	2.05	4.5	8.1	5.6	8.15	450	16.6	5.05	3.79	13.37
284	26	2019-11-12	2	52	155	21.6441	3	1	0	0	0	2	2	1	1.5	3.82	20.76	9.66	23.2	12.7				2.3					0.84	3.05	1.12	1.63	3.14	3.81	14.04	7.38	9.6	10.1	2.45	5.2	7.6	5.9				3.75	3.17	13.77	9.53
285	31	2019-11-08	3	53	160	20.7031	2	1	1	0	0	2	0	1	0.778	5.24	15.29	12.5						2.33					0.63	3.37	1.58	1.48	1.37	4.09	11.57				2.27	5.3	7.8	5.8	12.44	341	12.3	1.94	3.9	11.48	8.62
286	28	2019-11-19	2	66	160	25.7812	3	1	0	0	0	2	0	1	2.31	5.44	21.26																2.43	3.72	13.27				2.22	4.3	8.1	6.4	23.58	552	17.4	1.56	3.89	10.41	6.96
287	29	2019-11-12	3	53	162	20.1951	2	1	0	0	0	1	2	1	1.99	3.54	13	8.4															4.36	3.41	14.06	7.12	28.3	8.5	2.15	5	5.7	6.6	29.03	442	16.2	5.61	3.5	12.44
288	33	2019-11-10	1	74	169	25.9095	3	2	0	0	0	1	0	1	5.1	4.69	15.98	8.04						2.29					0.77	3.64	1.26	1.97	2.76	3.42	13.76				2.13	5.4	7.7	6.7	28.78	387	16.8	2.56	2.69	13.69
289	32	2019-11-20	3	68	162	25.9107	3	1	0	0	0	1	2	1	1.64	4.3	16.68	11.68															2.19	4.05	12.67				2.09	4.3	4.4	6.5	22.91	370	16	2.43	4.4	11.44
290	30	2019-11-25	2	48	164	17.8465	2	1	0	1	0	2	2	1	2.73	4.97	15.27	15.77	24.8	10.7				2.36					0.61	4.9	2	2.24	5.63	3.93	12.74		29.5	9.7	2.16	4.4	7.7	5.3	21.69	260	16.3	0.937	3.89	16.05	7.68
291	27	2019-11-26	3	53	157	21.5019	1	1	0	0	0	1	2	1	0.698	4.87	18.1							2.22									1.31	3.46	12.7		14.5	9.9	2.09	4.2	6.9	5.2	23.49	404	17.7	2.41	3.96	11.22
292	32	2019-11-23	2	72	170	24.9135	2	1	0	0	0	2	0	1	1.01	4.98	18.3	11.46															1.58	4.1	11.76		15.9	10.3	2.13	4.9	8.1	7.4				1.77	4.29	11.71
293	26	2019-12-10	3	50	164	18.5901	3	1	0	0	0	1	0	1	2.71	4.87	14.98	15.34	22.3	14.4				2.23					0.73	3.7	1.38	2	3.83	3.99	11.89	7.06	22.6	11	2.29	4.4	8.2	6.5				4.42	3.96	10.3	6.19
294	29	2019-12-01	2	52	163	19.5717	2	1	0	0	0	1	0	1	3.1	5.93	20.78	7.81						2.28					1.05	3.02	1.27	1.55	2.72	4.44	14.05				2.24	4.6	9	7.4	33.62	250	18.2	2.37	4.69	12.84
295	28	2020-01-05	2	54	158	21.6311	2	1	0	0	0	1	0	1	3.56	5.2	16.4	14.86						2.28					0.51	4.39	2.03	2.01	3.76	3.53	11.84				2.03	4.8	8.4	6.8	43.89	508	＞20	2.78	3.41	9.91
296	27	2020-01-06	2	63	161	24.3046	2	1	0	0	0	2	0	1	0.9	5.06	15.89	20.89						2.33					1.07	5.12	1.46	3.33	3.37	4.28	10.66					4.9	5.5	6.5	21.16	305	18.7	3.68	3.58	12.01
297	29	2019-12-25	2	47	160	18.3594	3	1	0	0	0	2	2	1	3	5.07	17.03	364.1															2.09	3.44	14.1				2.04	4.7	8.4	7.9	12.75	270	16.6	1.11	2.81	14.88
298	29	2019-12-26	2	50	160	19.5312	3	1	0	0	0	1	0	1	1.48	5.39	19.78																2.8	3.79	13.51				2.01	5.1	8	7.5	14.2	294	＞20	1.91	3.91	10.98	8
299	29	2020-01-01	3	52	159	20.5688	3	1	0	0	0	2	0	1	3.72	5.01	18.58	15.12						2.29									4.12	3.95	14.78					4.9	8	6.5	12.95	711	18.5	3.02	3.66	13.11	9.22
300	28	2019-12-27	3	53	161	20.4467	3	1	0	0	0	1	0	1	2.11	5.51	16.46	10.42						2.25					0.55	4.02	1.79	1.98	2.26	3.7	13.08				2.14	5.4	10.3	6.9				2	3.59	13.39
301	33	2020-01-01	3	60	155	24.974	2	1	0	0	0	2	2	1	2.19	5.08	17.37	8.66															3.27	4.09	12.56				2.21	5.1	9.7	8.1	13.47	343	19.1	2.55	3.61	12.72	12.21
302	32	2020-01-18	2	56	160	21.875	3	2	0	0	0	2	0	1	0.668	5.03	16.82	11.81															2.88	3.64	13.14				1.97	4.6	7.7	6.2				2.14	3.33	14.09
303	29	2019-12-28	2	60	175	19.5918	3	2	0	0	0	1	2	1	2.22	5.54	18.74	7.79															3.61	4.01	13.95				2.09	5.2	9	7.9	18.62	386	19.5	3.16	3.93	11.56
304	29	2020-01-01	3	63	162	24.0055	3	1	0	0	0	2	0	1	0.26	5.35	18.48	11.22															0.839	4.21	12				2.09	4.6	9	7.9	10.02	374	18.2	0.9	4.04	13.25	12.34
305	26	2020-01-03	3	47	163	17.6898	3	1	0	0	0	2	0	1	2.35	5.59	15.18	21.97	11.2	11.4				2.3					0.68	4.83	2.11	2.32	3.72	3.9	11.39	23.34	18.2	8.7	2.15	5	6.5	6.8				3.76	3.72	12.14	18.04
306	28	2020-01-02	3	53	163	19.9481	3	1	0	0	0	2	2	1	4.52	5.4	15.72	80.64															2.46	3.97	14.6				2.16	4.6	7.2	6.5	43.54	295	18.2	1.12	3.25	14.68
307	28	2020-01-01	2	51	163	19.1953	1	1	1	0	0	2	0	1	2.74	4.3	15.49	15.45															5.2	4.36	13.83	11.73	11	8.6	2.06	4.5	5.3	5.9	15.86	276	10.4	6.38	3.32	11.95	7.99
308	28	2020-01-11	3	68	158	27.2392	3	1	0	0	0	2	1	1	2.78	5.35	17.17	23.12															2.68	3.92	14.78				2.08	4.5	6.3	5.8	21.84	377	17.9	1.85	3.82	14.15
309	30	2020-01-10	3	59	162	22.4813	3	1	0	0	0	1	2	1	3.37	4.3	15.97	11.81						2.31									4.51	3.62	11.57				2.13	5.1	7.2	5.9	21	414	＞20	9.29	3.64	14.73	14.68
310	29	2020-01-16	3	43	158	17.2248	3	1	0	0	0	2	2	1	1.64	4.94	17.15		37.6	12.7	0.76	0.97	11.8	2.24									1.42	3.43	12.49		12.5	10.5	2.05	4.3	7.7	5.3				1.15	3.55	14.27
311	32	2020-02-08	3	65	172	21.9713	3	2	0	0	0	1	2	1	5.69	4.06	13.34	16.58															1.72	2.91	12.38	8.3			1.92	4.7	8.9	9	19.76	233	19.7	1.1	2.78	13.94	11.79
312	28	2020-02-10	2	47.5	160	18.5547	3	1	0	0	0	2	2	1	8.25	4.3	11.18	> 600															2.91	3.25	13.15				2.04	4.7	8	5.9	14.24	388	18.6	2.92	3.22	14.37
313	30	2020-02-19	2	49.5	157	20.082	2	2	0	0	0	2	2	1	0.973	4.67	18.17	6.42															1.68	3.65	13.18				2.15	4.1	7	6.3	5.66	421	12.5	1.85	3.22	15.54
314	35	2020-02-21	3	63	160	24.6094	3	2	0	0	0	2	0	1	1.5	5.56	20.61	5.89															1.9	5.16	11.6				2.1	5.3	9.8	7.7	8.63	171	13.3	2.38	4.61	10.34	8.91
315	29	2020-03-01	3	80	166	29.0318	2	1	0	0	0	2	2	1	2.13	5.69	16.42	10.87															2.08	4.34	14.82				2.02	5.2	7	6.3	5.48	393	7.3	2.44	4.3	13.16
316	34	2020-03-07	2	57	160	22.2656	2	1	0	0	0	2	2	1	2.51	5.29	15.03	8.04															1.41	4.21	9.46		14.6	8.6	2.05	5	9.5	9.3	6.29	401	12.2	3.43	3.47	11.52	8.07
317	31	2020-03-05	3	60	163	22.5827	2	1	0	0	0	1	2	1	0.985	5.1	15.66	7.79						2.37									1.73	4.19	12.61				2.16	5	7.2	7	17.66	572	19.9	1.59	4.02	14.45
318	24	2020-03-03	3	50	164	18.5901	2	1	0	0	0	1	2	1	0.758	5.28	17.97	5.74															0.941	4.45	13.68				2.1	4.4	8.9	7.3				0.29	4.28	16.26
319	25	2020-03-07	3	52	165	19.1001	3	1	0	0	0	2	2	1	4.79	4.63	17.07	8.82						2.28					0.67	4.34	1.71	2.19	3.37	3.56	13.14					4.9	7.4	7.5	9.5	461	18.2	1.96	3.06	16.23
320	29	2020-03-12	3	50	167	17.9282	2	1	0	0	0	1	1	1	0.357	4.88	18.13	7.3															0.901	3.73	13.96					4.8	7.7	6	11.62	470	18.7	1.68	3.68	13.46	8.28
321	25	2020-03-16	2	62	163	23.3355	1	1	0	0	0	2	2	1	2.69	4.57	15.05	6.06											0.71	3.58	1.44	1.81	3.16	3.78	11.54					4.9	8	7.5	13.21	602	19.9	2.3	3.73	9.68
322	33	2020-03-20	3	50	157	20.2848	3	2	0	0	0	2	2	1	1.19	3.72	16.88																1.93	3.04	13.88					4.3	7.8	7.3	22.65	283	19.3	4.63	3.02	13.47	10.12
323	28	2020-04-01	2	50	155	20.8117	2	2	0	0	0	2	2	1	0.943	4.46	17.91	6.56															1.1	3.07	14.1				2.03	5	7.8	6.9	5.39	202	16.8	1.52	3.29	14.61
324	27	2020-04-03	3	52	158	20.83	2	1	0	0	0	2	0	1	0.804	5.03	17.38	14.59											0.76	4.1	1.65	2.32	1.01	3.89	14.13	12.91				4.4	5.6	5.9	2.12	317	>20	1.04	3.91	13.48	13.93
325	28	2020-04-11	2	70	167	25.0995	2	1	0	0	0	2	0	1	1.23	4.7	15.22	6.43															1.86	3.97	12.69					4.4	7.7	6.5	20.01	244	17.3	1.5	3.63	11.57	8.91
326	33	2020-05-01	3	53	163	19.9481	3	1	0	0	0	2	2	1	4.74	3.72	16.55	16.08	17.5	12.1				2.28									4.4	3.74	16.61		17.6	7.7	2.08	4.8	9.4	6				2.97	3.18	14.18
327	31	2020-06-06	3	65	160	25.3906	2	1	0	0	0	2	2	1	1.59	5.26	15.14	7.83						2.27									1.18	4.24	10.42				2.07	4.5	8.8	8	5.72	344	19.9	1.97	4.16	11.04	10.62
328	31	2020-05-23	3	58	163	21.83	3	1	0	0	0	1	2	1	1.91	4.86	14.66	13.33															2.73	3.48	11.39				2.21	4.6	10.1	8	5.37	596	18.7	2.76	3.65	12.97
329	27	2020-05-28	1	46	160	17.9688	3	1	0	0	0	1	1	1	1.94	4.68	17.17	6.78															1.93	3.58	12.48				2.12	5.4	7.4	6.5	11.42	463	19.5	2.19	3.45	13.06
330	34	2020-06-27	1	51	156	20.9566	1	2	0	0	0	1	0	1	4.61	4.64	15.36	22.49															2.47	3.11	12.2				2.17	5.2	9.9	6.8	＜1	272	5.5	1.86	3.1	12.41
331	26	2020-07-03	1	66.5	168	23.5615	2	1	0	0	0	1	2	1	1.19	5.67	16.35	7.59						2.22					1.3	4.14	1.77	2.21	1.72	4.37	11.01				2.22	5.3	8.3	6.4				1.72	3.96	11.66
332	26	2020-07-29	2	41.5	160	16.2109	3	1	0	0	0	2	2	1	0.359	3.86	16	19															2.2	3.68	14.56	18.01			2.23	4.8	5.7	5.5				0.532	3.32	12.76
333	33	2020-07-31	3	58	154	24.4561	3	1	0	0	0	2	0	1	3.09	4.58	14.78	9.11						2.22					1.01	4.51	2.15	1.97	2.56	3.95	11.72				2.02	4.9	8.5	6.2	4.91	341	13.9	3.01	3.26	12.29
334	26	2020-08-21	3	66	167	23.6652	2	1	0	0	0	1	0	1	2.56	5.02	16.8	7.57						2.37					1.2	4.34	1.51	2.26	0.931	4.03	12.9				2.12	4.4	7.5	5.4	13.85	281	12.9	0.544	3.59	11.58
335	31	2020-08-22	3	57	164	21.1927	3	1	0	1	0	2	0	1	4.59	3.92	15.23	369.3															3.39	3.65	14.36				2.1	4.7	6.4	5.8	9.14	438	7.7	1.29	3.64	16.29	177.6
336	28	2020-08-08	2	56	168	19.8413	2	1	0	0	0	1	0	1	2.04	4.67	16.04	10.6						2.29					1.29	3.51	1.48	1.87	2.48	4.41	12.18				2.12	4.8	5.9	8.6				1.62	3.17	11.64
337	25	2020-08-28	2	50	160	19.5312	3	1	0	0	0	2	0	1	1.74	4.21	16.04	8.91															0.346	18.63	14.11				2.04	4.8	5.7	5.8	8.84	161	8.6	2.25	4.42	11.64	8.69
338	28	2020-08-28	3	68	175	22.2041	1	1	0	0	0	1	0	1	1.85	4.39	17.33	35.47															1.49	3.6	11.81				2.21	4.9	4.2	5.4				0.812	3.71	13.82
339	28	2020-08-27	2	48	162	18.2899	2	1	0	0	0	1	0	1	4.75	4.72	17.3	13.06															3.02	3.61	16.27	5			2.18	4.1	8.3	7.5	9.79	426	＞20	2.62	3.52	15.61
340	27	2020-09-06	3	58	169	20.3074	3	1	0	0	0	2	2	1	0.623	5.03	14.71	8.52						2.09					0.91	4.45	1.89	2.13	1.43	3.73	10.75				2.08	4.7	9.5	5.2				1.22	3.24	12.93
341	25	2020-09-13	2	53	161	20.4467	3	1	0	0	0	1	0	1	2.03	4.93	18.14	10.15															1.61	3.26	12.83				2.07	4.6	5.7	5	11.01	262	18.2	1.58	3.45	13.34
342	32	2020-09-17	2	48	166	17.4191	3	1	0	0	0	1	1	1	0.534	4.38	14.89	13.67						2.21					0.7	4.06	1.7	1.98	1.07	3.92	11.34				2.04	4.8	7.2	6.4	13.07	426	18.9	0.882	3.91	11.84	12.71
343	29	2018-11-23	2	53	157	21.5019	3	1	0	0	0	1	0	1	1.02	4.98	17.19	16.47															0.502	3.97	11.02				2.14	5.3	6.5	5	6.95	280	14.8	0.738	3.56	12.45
344	27	2018-10-13	3	50	163	18.8189	2	1	0	0	0	1	2	1	6.41	5.42	17.95	9.49															1.23	3.73	14.62	20.6	24.4	9.7	2.19	3.9	7.2	5.7	28.43	399	17.7	2.72	3.76	14.75	13.57
345	23	2018-10-18	3	45	162	17.1468	2	1	0	0	0	1	2	1	1.24	3.95	18.73	9.15	16	15.2				2.33					0.56	3.81	1.39	2.12	0.985	4.12	12.83		5.1	10.1	2.21	4.2	5.6	5.8	15.12	263	6.4	1.9	4.27	12.29	5
346	31	2018-10-18	3	57.5	158	23.0332	1	2	0	0	0	2	2	1	4.23	4.63	16.12	13.11															2.29	4.3	12.09				2.11	4.4	8	5.9	4.27	403	5.7	1.77	4.05	12.07
347	28	2018-11-06	2	62	167	22.231	1	2	0	0	0	2	0	1	5.92	4	14.53	228.3															1.97	3.94	16.15		20.1	9.6	2.06	4.4	5.9	5.7	17.6	353	16.1	2.38	3.91	15
348	29	2018-10-25	2	54.5	163	20.5126	2	1	0	0	0	1	1	1	4.27	4.85	15.49	13.3	22.9	12.7				2.36					0.78	4.23	1.48	2.56	3.12	4.44	11.81					4.7	7.3	6.2	10.79	287	17.6	1.51	4.16	12.51
349	27	2018-10-28	3	42	162	16.0037	2	1	0	0	0	1	0	1	2.46	5.35	19.23	10.04															2.56	4.29	11.69		12.1	9.5	2.34	4.8	9.8	7.3	20.23	454	14	3.67	3.69	11.25	10.62
350	31	2018-12-05	3	67	168	23.7387	3	2	0	0	0	1	1	1	2.13	4.4	17.72	5															3.14	4.53	15.03					4.3	7.7	6.2	9.04	395	11.2	4.07	4.16	12.57
351	23	2018-11-06	1	70	166	25.4028	1	1	0	0	0	2	0	1	8.01	5.87	15.21	164.3	23.9	13.4				2.26									1.9	4.1	13.51	111.1	25.6	9.3	2.2	4.7	7.9	5.4				3.28	4.45	13.05
352	26	2018-12-15	3	61	163	22.9591	2	1	0	0	0	1	1	1	2.73	4.51	15.91	11.77															2.16	4.18	11.49		9.6	9.4	2.14	4.5	4.4	5.9	17.88	635	18.6	2.28	3.73	12.25	12.67
353	27	2018-11-07	2	62	168	21.9671	2	1	0	0	0	1	0	1	1.18	5.38	15.2	5.06															1.66	4.46	14.65	12.18	15.9	9.8	2.32							3.31	4.48	15.63	8.77
354	24	2018-11-11	2	50	165	18.3655	2	1	0	0	0	1	0	1	6.33	6.76	15.83	225.6	29.4	14.5				2.24									2.52	4.02	14.54		8.7	6.7	2.08	4.6	7.3	5	5.55	212	12.5	4.12	3.95	15.23
355	30	2018-11-12	2	51	162	19.433	2	1	0	0	0	1	0	1	0.918	4.55	17.74	5.43															1.35	3.51	14.08		31.6	9.3	2.29	4.4	7.6	5.8	10.76	449	17.6	1.57	3.76	13.07
356	34	2018-12-01	1	58	166	21.048	2	2	0	0	0	2	2	1	1.04	4.11	16.14	5															3	4	13.07		15.6	9.6	2.15	4.5	6.4	5.5	9.74	369	14.6	3.84	3.96	11.17
357	28	2018-11-24	3	66	164	24.539	3	1	0	0	0	0	0	1	4.12	6.09	17.1	5	8.5	14.4				2.38									1.87	4.59	10.72		10.9	9.1	2.17	4.9	7.7	6.7	4.67	268	6.9	2.12	3.89	11.59
358	25	2018-11-24	2	42	164	15.6157	3	1	0	0	0	2	0	1	0.006	10.56	37.56		10.5	13.9				2.31									0.33	5.07	15.27		38.8	10.7	2.14	4.3	7.3	5.4	14.88	543	17.1	0.74	4.73	14.34
359	24	2018-11-30	3	55	160	21.4844	2	1	0	1	0	2	0	1	1.4	5.08	22.13																2.78	4.71	15.91				2.25	4.6	8.2	5.9				2.65	3.92	13.9
360	27	2018-12-09	3	55	167	19.721	2	1	0	0	0	1	2	1	0.713	4.72	16.88	6.54															1.2	4.16	12.02				2.18	4.9	8.2	7.3	21.42	384	17	1.32	3.85	12.66
361	29	2018-12-07	2	49	150	21.7778	1	1	0	0	0	2	2	1	2.69	4.87	17.71	26.2															3.63	4.33	10.86		19.4	10.4	2.17	4.8	8.5	6.8	9.78	192	18.5	2.11	3.98	10.1
362	25	2018-12-01	3	63	162	24.0055	2	1	0	0	0	1	2	1	2.39	4.4	16.18	9.25															3.72	4.42	12.1				2.22	4.5	7.5	6.3	14.8	400	15.2	6.16	5.23	12.87	14.05
363	27	2018-12-09	3	54	160	21.0938	3	1	0	0	0	2	2	1	1.92	4.95	18.51	9.88						2.27									1.8	3.63	12.97				2.11	4.6	4.9	7.5	8.08	356	10.2	2.11	4.16	12.41	11.58
364	22	2018-12-02	1	56	171	19.1512	2	1	0	0	0	2	2	1	0.366	5.84	22.81	9.36															3.91	4.34	14.42		11.4	10.1	2.19	4.2	6.5	6.2	12.14	201	14.9	3.82	4.46	14.7	13.47
365	26	2018-12-06	3	55	165	20.202	1	1	0	0	0	1	2	1	1.67	5.23	17.69	13.75						2.33									1.03	4.55	13.81				2.17	4.1	6.3	5.7	10.49	335	11.6	0.415	5.06	14.44
366	23	2018-12-14	3	65	168	23.03	3	1	0	0	0	1	2	1	2.2	5.16	21.14																1.98	3.79	14.09				2.22	4.7	6.8	4.1	8.72	321	9.9	5.3	3.79	14.09
367	26	2018-12-14	1	45	158	18.026	2	1	0	0	0	2	0	1	3.35	6.68	17.39																4.05	5.03	14.46		13.4	10.9	2.19	4.7	5.9	6.4				2.44	5	15.34
368	24	2018-12-17	2	63	167	22.5896	2	1	0	0	0	2	2	1	6.16	5.64	14.88	132.4	30.4	11.2				2.36					0.79	3.66	1.12	2.14	1.52	3.91	13.23	38.69	16.6	10	2.27	4.7	7.4	6.7	34.07	175	16.5	0.85	4.4	14.45	32.45
369	24	2018-12-12	2	48	158	19.2277	2	1	0	1	1	2	0	1	1.64	5.06	18.58	5															1.62	3.37	13.8				2.1	4.1	5.3	5.1	28.89	305	17.4	1.57	3.56	14.55
370	26	2019-01-10	3	47	161	18.132	1	1	0	0	0	1	1	1	3.3	5.07	19.5	6.98															2.78	4.25	13.81				2.03	4.8	6.5	6.3	5.55	222	9.2	3.27	3.88	13.12	9.98
371	26	2018-12-11	3	60.7	162	23.1291	2	1	0	0	0	1	0	1	2.9	4.89	16.2	7.23															3.36	3.85	11.2		11.4	8.6	2.13	4.3	6.3	5.7	16.03	268	13.7	4.49	3.63	10.4
372	30	2019-01-04	3	57	163	21.4536	3	1	0	0	0	2	2	1	1.39	5.67	14.17	16.6															1.48	4.54	10.73				2.28	5	6.8	8.2	36.48	320	17.3	1.72	5.17	10.03	10.75
373	36	2018-12-14	2	70	163	26.3465	2	2	0	0	0	2	2	1	3.17	4.19	18.1	80.12															2.61	3.31	11.8		23.7	9.9	2.14	4.4	11	10.1	11.9	300	15.2	2.67	3.12	12.85
374	26	2018-12-15	2	70	167	25.0995	2	1	0	1	0	2	2	1	1.57	5.15	18.06	10.11															2.04	5.31	14.9	15.8	10.6	9.4	2.12	4.7	4.7	5.1				3.51	4.11	12.72
375	27	2018-12-23	2	59	171	20.1771	2	1	0	0	0	1	0	1	2.31	4.82	17.66	5.99															1.87	3.73	12.89		13.4	10.7	2.16	3.9	5.7	6.9	11.45	209	10.1	0.787	4.2	13.93
376	32	2018-12-21	2	55	160	21.4844	2	1	0	0	0	2	2	1	0.993	4.64	20.44	8.99						2.34									1.53	3.9	14.21				2.16	4.6	7	6.5	17.79	471	16.9	2.5	3.91	14.33
377	26	2018-12-23	3	70	161	27.0051	2	1	0	0	0	1	0	1	6.12	4.86	15.73	9.66															1.73	3.82	13.38		18	9.3	2.31	4.4	6.2	4.9	22.71	296	17.2	1.74	4.46	10.75
378	31	2018-12-31	3	52	164	19.3337	2	1	0	0	0	1	1	1	0.354	5.51	20.24	10.43						2.37									2.56	4.63	11.83	9.5			2.18	4.6	9.2	8.5				2.21	4.29	13.07
379	31	2019-01-02	3	51	160	19.9219	2	1	1	0	0	1	1	1	1.15	4.92	20.91	12.7															2.17	4.06	13.44		8.5	9.9	2.18	4.3	8.1	6.1				4.43	4.51	14	12.64
380	26	2018-12-21	3	58	160	22.6562	2	1	0	0	0	2	2	1	3.26	4.56	16.12	10.67															4.25	3.6	13.95				2.34	4.5	8.2	7.7				2.6	3.7	15.36
381	28	2019-01-06	2	53.3	166	19.3424	2	1	0	0	0	2	2	1	2.72	4.55	15.85	19.06															7.56	4.17	14.15		17.4	7.8	2.14	4.6	6.3	6.4				1.31	4.08	15.24
382	29	2018-12-29	3	62	160	24.2188	3	1	0	1	0	1	0	1	6.88	4.52	14.48	11.49															4.24	3.46	13.81		14.3	11.3	2.21	4.2	7.4	6.5	6.23	103	3.9	3.75	3.06	15.58
383	29	2019-01-05	1	60	163	22.5827	2	2	0	0	0	2	2	1	2.11	5.04	16.5	7.36															3.22	4.41	11.65				2.17	4.3	7.2	4.1	24.71	342	17.2	3.01	4.09	12.16	9.01
384	29	2018-12-29	3	40	163	15.0551	2	1	0	1	1	2	2	1	3.85	5.25	16.75	8.43	14.1	12.8				2.25					0.99	4.5	1.29	2.78	4.01	4.87	13.47	12.29	8.9	8.8	2.08							5.44	3.8	15.33
385	36	2019-01-11	1	70	160	27.3438	1	1	0	0	0	2	0	1	1.63	5.64	18.24	8.2	15.8	9.5				2.2									1.9	4.6	14.09		12.7	9.6	2.13	4.8	8.1	8.7				1.83	3.63	14.66
386	24	2019-01-17	3	56	165	20.5693	3	1	0	0	0	2	2	1	2.38	4.97	20.61	7.47															3.95	4.05	13.03				2.15	4.3	5.5	6.3	17.36	482	6.8	2.24	4.22	12.53
387	27	2019-01-09	3	51	168	18.0697	3	2	0	0	0	2	2	1	1.58	4.23	15.23	597.9															1.28	4.24	14.52	461.5			2.04	4.6	9.4	7.7	30.64	222	13.2	1.8	3.13	13.19	298.9
388	28	2019-01-18	3	44	166	15.9675	2	1	0	0	0	2	0	1	0.49	5.27	20.52	7.41	25.5	14.8				2.2									1.67	3.78	13.55		13.2	8.8	2.02	4.2	6.2	5.7	20.48	252	6.2	3.51	3.48	12.94
389	31	2019-01-16	3	73	163	27.4756	3	1	0	0	0	2	2	1	2.74	4.19	16.21	12.7															4.39	4.03	15.07				2.13	4.8	7.2	5	35.66	368	16.3	2.95	3.62	15.96
390	25	2019-01-20	2	48	160	18.75	2	1	0	0	0	1	1	1	10.72	5.26	13.9	349.6															1.68	3.66	14.35		6.7	6.7	2.1	4.6	5.3	5.5	6.07	346	11.4	3.04	3.03	12.81	154.3
391	28	2019-01-25	3	56	157	22.719	3	1	0	1	0	2	2	1	1.02	4.48	15.66	11.66															1.53	4.37	11.07		7.8	10.3	2.22	4.3	7.9	4.6	5.06	472	16.4	2.3	4.27	9.49
392	28	2019-01-26	3	47	153	20.0777	3	1	0	1	0	2	2	1	6.56	4.72	15.89	9.93	16.5	14.4				2.31									3.84	4.23	14.87		12	10.7	2.15	4.9	8.5	7.5	26.03	163	14.1	1.46	4.06	16.02
393	34	2019-01-20	1	48	158	19.2277	3	2	0	1	0	2	0	1	1.69	5.17	16.12	122.3	17.7	8.7				2.29									2.98	4.21	13.68		9.5	8.2	2.11	4.4	6.2	4.4	8.67	231	9.4	2.93	4.21	13.12
394	25	2019-01-10	3	64	166	23.2254	2	1	0	0	0	2	2	1	1.76	4.76	16.72	11.24															1.55	5.06	13.25	14.27			2.32	5.7	9.4	6	30.84	252	18.6	2.15	4.6	13.53	16.49
395	28	2019-01-30	2	60	158	24.0346	2	2	0	0	0	2	0	1	1.23	4.2	16.28	10.03															2.11	3.61	12.63		20	11	2.07	4.1	7.4	5.5	6.57	349	10.1	2.25	3.52	12.16
396	32	2019-02-25	3	58	162	22.1003	3	2	1	0	0	1	1	1	1.36	5.54	16.36	11.74															1.51	4.2	13.12		15.4	9.8	2.12	4.7	9.7	7.7	19.93	294	17.6	1.53	3.71	13.41
397	27	2019-02-18	3	50	160	19.5312	3	1	0	0	0	2	2	1	1.16	4.51	14.57	7.83	12.6	11.1				2.15					0.85	3.69	1.44	1.95	2.37	4	12.82	7.68	5.7	8.2	2.06	5.2	7.9	6.3				2.55	3.22	12.75	12.59
398	27	2019-02-06	2	68	163	25.5937	2	1	0	0	0	0	1	1	1.55	5.77	16.28	7.5															3.07	4.62	14.32		28.1	9.3	2.13	4.3	8.3	6.4	49.73	476	17.5	2.78	4.43	13.41
399	28	2019-03-01	3	57	168	20.1956	2	1	0	0	0	2	2	1	3.62	5.15	17.11	596						2.32									2.39	4.51	11.76				2.28	5.1	7.6	8	3.1	231	10.6	2.32	3.87	8.89	265.8
400	31	2019-01-26	2	47	150	20.8889	3	1	0	0	0	2	2	1	2.07	5.69	16.56	17.21															2.44	4.64	13.17				2.22	5.1	6.4	7.2	25.77	434	17.1	0.855	3.91	12.19
401	24	2019-02-04	3	47	162	17.9089	3	1	0	0	0	2	0	1	0.119	5.45	22.76																1.51	4.05	16.32		8.4	8.7	2.22	5.2	5	5	4.07	212	11.5	1.01	3.65	16.6
402	26	2019-02-09	2	52	163	19.5717	2	1	0	0	0	2	2	1	4.96	5.36	15.13	11.03															2.33	4.2	12.85				2.2	5.4	8.5	10.2	15.45	223	10.2	2.62	3.14	14.66	10.09
403	32	2019-02-02	2	50	166	18.1449	3	1	0	0	0	2	0	1	2.77	5.07	18.14	80.44															1.5	4.63	12.5	37.39			2.23	4.8	5.7	6.2	11.34	457	17.1	1.91	5.27	11.13	41.38
404	26	2019-02-14	2	56	165	20.5693	3	2	0	0	0	2	0	1	0.114	4.61	15.95	5.5															1.35	3.63	13.6				2	4.6	8.4	5.6	18.26	159	11.7	1.43	4.02	13.87	8.65
405	26	2019-02-10	1	68	168	24.093	3	1	1	0	0	2	0	1	2.71	6.09	15.07	6.53	7.8	12.7				2.36									3.47	5	10.57		7.8	11.3	2.3	4.9	8	6.8	5.52	225	6.1	2.08	4.52	12.02	5.62
406	29	2019-02-10	3	50	161	19.2894	3	1	0	0	0	1	0	1	1.64	4.87	16.18	23.64															1.46	4.07	13.38				2.03	4.4	6.5	5.9	7.15	379	18.8	1.65	3.89	11.89	26.2
407	26	2019-02-22	3	70	166	25.4028	3	1	0	0	0	2	0	1	2.67	5.42	17.05	16.97															2.86	4.68	11				2.11	4.6	7.8	6	13.95	260	14.8	3.62	4.64	9.89
408	32	2019-03-22	3	60	164	22.3081	3	2	0	1	0	2	2	1	0.912	5.26	20.72																1.25	4.16	14.38		21	8.8	2.22	4.7	8	6.1	21.62	276	19.7	0.979	4.12	14.1
409	28	2019-02-22	3	62	157	25.1532	2	1	0	1	0	2	2	1	2.31	4.71	13.45	11.7															1.89	4.28	10.99		12.3	11.7	2.17	5	8.7	6.9	11.57	161	19.5	2.01	4.12	10.76
410	25	2019-02-25	3	60	173	20.0474	3	1	0	0	0	2	2	1	2.76	4.71	16.97	17.63															3.56	4.21	16.26	19.83				4.5	9.6	7.5	26.81	449	18.9	3.22	3.93	13.38
411	25	2019-02-26	3	49	158	19.6283	3	1	0	0	0	1	1	1	1.14	5.6	19.98	14.13						2.39									1.78	4.39	14.99				2.41	4.3	10.6	7.6	45.1	533	18.6	1.68	3.75	12.91	7.04
412	27	2019-02-28	2	60	165	22.0386	3	1	0	0	0	2	2	1	3.04	6.03	17.38	10.18															4.13	4.61	13.75				2.19	4.8	8.4	6.5	24.65	261	15.2	5.38	5.17	12.95	5.88
413	29	2019-03-03	3	64	162	24.3865	3	1	0	0	0	2	2	1	0.986	5.63	13.53	9.08						2.24									1.1	4.39	11.76				2.24	4.7	6.9	5.4	8.54	242	17.8	1.26	4.14	10.98	6.84
414	29	2019-03-02	3	61	161	23.533	3	1	0	0	0	1	2	1	1.08	5	16.4	5.31															2.34	4.45	12.28	7.15	13.6	9.7	2.15	4.2	7.4	8.2				2.07	3.83	11	5
415	29	2019-03-10	2	70	164	26.0262	2	1	0	0	0	1	0	1	2	6.24	15.56	22.1	16.2	10.7				2.26					1.11	3.99	1.49	2.03	0.886	5.5	12.57	24.72	12.2	9.7	2.19	5.1	6.9	6.8				0.677	5.27	15.42	21.11
416	30	2019-03-25	3	49	168	17.3611	3	1	0	0	0	2	0	1	0.106	6.66	22.13							2.37									0.574	5.28	16.57				2.13				27.29	313	15.1	0.435	4.85	14.32	11.4
417	27	2019-03-19	3	57	165	20.9366	1	1	0	0	0	1	0	1	2.54	4.65	16.76	23.37															2.6	4.53	11.64	14.98			2.22	4.5	6.7	5.9	20.8	237	16.7	2.86	5.12	12.14	11.96
418	30	2019-03-24	3	72	177	22.9819	2	1	0	0	0	2	0	1	0.822	4.73	18.87	17.89															1.87	3.69	15.09				2.21	5.2	9.7	10.9	12.53	495	15.2	3.05	3.96	14.63	13.98
419	29	2019-03-27	2	55	165	20.202	1	1	0	0	0	1	2	1	0.042	4.89	22.45																2.57	3.68	14.65	11.44	13.7	8	2.34	4.6	8.7	7.4				4.05	3.64	11.72
420	30	2019-04-11	3	51	171.8	17.2792	1	1	0	0	0	2	2	1	0.862	4.4	16.94	6.88															1.08	4.24	13.84				2.2	4.3	7.8	6.4	13.08	270	＞20	1.44	4.51	11.35
421	29	2019-04-20	2	62	163	23.3355	3	1	0	0	0	1	1	1	2.97	5.1	17.15	10.43															2.98	3.82	11.46					4.6	7.7	8.3	35.1	275	7.6	3.08	4.18	11.29
422	25	2019-04-24	3	76	167	27.2509	3	1	0	0	0	1	2	1	5.47	5.3	17.55	63.49															1.98	3.95	11.79				2.15	4.6	7.8	7.1	8.72	311	8	6.15	3.47	10.23
423	26	2019-05-09	2	55	152	23.8054	3	1	0	0	0	1	0	1	4.35	4.46	13	8.94															2.75	3.47	13.8		18.2	8.2	2.22	5.1	6.7	6.9				5.47	3.19	10.78	5.51
424	28	2019-05-07	2	69	168	24.4473	3	1	0	0	0	1	0	1	4.05	5.13	19.26	19.14															5.08	4.33	11.86				2.12	4.7	6.4	5.9	27.49	392	19.2	1.67	4.66	12.51
425	23	2019-05-14	2	43	168	15.2353	3	1	0	1	0	1	0	1	0.681	6.67	22.62	5															1.34	4.35	15.83				2.13	4.4	6.4	6.4	28.34	482	18.4	1.6	5.5	16.05
426	31	2019-05-25	3	48	156	19.7239	2	1	0	0	0	2	2	1	3.62	3.91	15.79	10.13															2.66	3.44	11.31	13.41	10.9	7.5	2.21							2.93	3.88	11.59	17.2
427	28	2019-06-09	3	46	161	17.7462	3	1	0	0	0	1	0	1	0.938	5.75	16.58	9.15															1.45	4.19	12.77				2.13	4.6	7.4	5.9	1.74	263	7.1	1.72	3.85	13.19	18.6
428	34	2019-06-28	3	58.5	158	23.4337	1	2	0	0	0	2	0	1	4.82	4.58	15.94	37.62	1.9	12.8				2.22									3.54	4.9	14.82		30.9	10.3	2.27	5.1	8	8	8.68	440	19.1	4.61	4.2	12.97	22.74
429	30	2019-06-15	2	48	158	19.2277	2	1	0	0	0	1	0	1	3.1	5.88	19.25	7.37	20.4	12.6				2.34									3.52	4.91	11.37		5.9	9	2.32	5.4	8.7	7.7	3.26	175	5.8	3.39	5.32	10.38
430	31	2019-06-15	3	55.4	170	19.1696	3	1	0	0	0	1	1	1	1.38	4.82	18.14	152.8															1.74	4.36	15.1		16.6	7.8	2.18	4.6	7.8	5	21.17	321	15.1	0.948	4.43	13.99	47.53
431	26	2019-07-06	3	75	169	26.2596	2	1	0	0	0	2	0	1	1.82	4.8	15.09	9.82															2.21	4.69	12.48		14.4	11.6	2.26	4.8	10.4	6.5				5.52	5.02	12.01	12.81
432	30	2019-06-22	3	53	173	17.7086	3	1	0	0	0	1	1	1	2.14	5.19	21.12	11.37															2.9	4.35	13.07				2.24	4.3	9.8	7.1	26.54	543	19.3	2.07	3.95	10.55
433	30	2019-06-25	3	51	165	18.7328	2	1	0	0	0	1	2	1	3.03	4.81	20.54	185.9															1.99	4.71	16.09				2.1	4.7	8.9	6.7	55.8	599	16.9	2.47	3.98	14.4	44.44
434	32	2019-07-04	3	62	165	22.7732	3	2	0	0	0	2	2	1	1.55	4.64	15.01	235.9															1.99	3.99	11.14		8.8	8.2	2.06	4.5	7.2	7	3.83	334	7	2.05	3.6	9.4
435	27	2019-07-13	3	56	167	20.0796	3	1	0	0	0	0	2	1	3.54	4.56	14.4	62.01															3.07	4.27	13.08	39.59			2.31	4.3	7.7	7.4	18.74	466	16.8	2.37	4.65	10.7	26.97
436	33	2019-07-08	3	48	163	18.0662	3	2	0	0	0	2	0	1	1.53	5.07	15.75	14.02															2.25	3.41	10.77				2.2	4.7	9.2	6.9	5.29	198	7.8	5.81	3.4	9.44	18.29
437	24	2019-07-04	3	47	168	16.6525	2	1	0	0	0	2	0	1	1.73	4.63	17.61	5															1.73	4.41	14.66		9.5	8.3	2.07	4.7	5.8	4.3	8.9	174	11.5	2.97	4.21	9.4
438	29	2019-07-18	2	46	162	17.5278	2	3	0	0	0	2	2	1	1.85	4.95	17.37	11.41						2.27									2.55	3.85	12.77				2.1				3.29	240	11.9	4.04	3.63	10.14
439	32	2019-07-06	3	52	163	19.5717	3	1	0	0	0	1	1	1	1.59	4.94	14.77	135.5															3.58	4.68	11.67				2.2	4.3	8	7.4	26.75	508	14.8	1.1	4.79	10.14	76.9
440	35	2019-07-08	3	47	150	20.8889	3	1	0	0	0	0	2	1	1.96	4.7	18.02	6.41															3.53	4.14	14.75		8.3	8.6	2.01	4.6	6.8	6.5	3.38	344	14.7	5.74	4.1	12	11.72
441	33	2019-07-18	2	55	168	19.487	1	2	0	0	0	1	1	1	0.852	4.31	17.59																1.49	3.75	14.56		14.8	9.8	2.08	4.5	8.4	7.2	51.6	275	15.9	1.41	3.58	12.61	12.17
442	27	2019-07-20	2	55	165	20.202	1	1	0	0	0	2	0	1	1.62	4.98	18.51	5															2.48	4.3	12.82		13.6	7.6	2.18	4.9	7.3	6.7	22.64	500	18	6.58	3.89	11.51
443	26	2019-07-13	3	50	156	20.5457	2	1	1	1	0	2	2	1	1.81	5.04	16.62	8.03															2.09	4.31	12.97	12.91	16.6	11.2	2.11	4.2	7.8	5.8				4.94	4.57	10.33
444	30	2019-07-19	3	48	160	18.75	3	2	0	0	0	1	1	1	4.06	4.72	13.73	8.9															2.49	4.4	9.7				2.11				15.98	390	16.9	2.67	3.62	11.93
445	30	2019-08-25	3	61	168	21.6128	1	1	0	0	0	0	2	1	1.02	3.52	12.77																1.72	3.2	11.22				2.12	4.4	8.3	6.2	9.6	310	6.2	1.75	2.6	10.15
446	29	2019-08-31	3	46	165	16.8962	1	2	0	0	0	2	2	1	1.33	5.09	19.4	9.95															3.65	3.74	12.53		30.7	8.2	2.17	4.6	7	5.5				2.31	3.57	12.9	5.7
447	29	2019-07-27	3	55	170	19.0311	2	1	0	0	0	1	1	1	2.07	5.14	16.8	5.8															1.6	3.91	10.79				2.14	5.1	7.8	7.2	2.15	393	7.6	1.5	4.17	9.94
448	27	2019-07-17	2	57	173	19.0451	1	1	0	0	0	2	0	1	4.7	4.17	16.53	6.3															8.22	4.04	14.66		13.2	8	2.06	4.2	6.7	5.5	19.31	254	5	3.34	3.72	14.14
449	28	2019-07-26	3	54	158	21.6311	3	1	0	0	1	2	0	1	2.1	4.85	18.28	6.76	20.5	13.2				2.34					1.29	5.02	2.08	2.5	5.44	5.14	10.38		6.4	8	2.1							3.3	3.81	10.84	8.67
450	36	2019-08-06	3	48	158	19.2277	3	1	0	0	0	1	2	1	1.2	3.86	16.23	10.62	17.3	12.3	0.77	1.17	19.5	2.41									3.2	3.81	12.09		29.9	9.2	2.14	5.4	8	5.7				4.1	3.35	12.05
451	27	2019-09-02	1	54	161	20.8325	1	2	0	0	0	2	0	1	0.742	5.47	20.39	7.57						2.33									1.97	4.28	13.37					4.7	9	6.1	4.14	196	8.5	2.54	3.96	13.93
452	25	2019-08-20	3	60	165	22.0386	2	1	0	0	1	2	0	1	2.24	4.49	16.09																5.4	4.28	13.13		13.4	10.7	2.39	4.3	8.4	6.9				2.75	3.52	10.7	32.52
453	36	2019-08-09	3	62	160	24.2188	3	2	0	1	0	2	0	1	1.08	4.39	16.15																1.75	3.64	13.69				2.14	4.6	7.2	6.9	2.37	202	9.1	1.89	2.91	12.92
454	31	2019-08-15	3	54	167	19.3625	3	1	0	0	0	2	0	1	0.965	4.35	17.34	7.17															2.21	4.15	11.93		21.3	9.8	2.24	4.6	7.2	7.1				2.45	3.86	11.13
455	28	2019-08-11	3	53.9	155	22.435	2	1	0	0	0	0	2	1	3.25	5.99	17.01	10.7															1.77	4.8	15.64		17	10.8	2.34	5.4	7.7	9.3	36.36	317	>20	1.46	3.68	11.66
456	31	2019-08-25	2	62.2	160	24.2969	1	1	0	0	0	1	0	1	1.65	4.57	13.21																2.09	3.73	9.12		9.2	11	2.17	5.1	9.8	7.2	3.55	136	18.4	1.2	3.62	10.23
457	31	2019-08-25	3	45	162	17.1468	2	1	0	0	0	2	0	1	2.35	4.5	15.07	7.1	24.9	10.4				2.33									3.78	4.12	10.07		17.7	9.3	2.27	4	6.7	5.7	8.11	465	17.6	1.76	3.43	9.8
458	27	2019-09-20	2	56	164	20.8209	2	1	0	0	1	1	2	1	1.65	4.53	18.03																2.68	3.56	14.08		21.7	8.8	2.22	4.4	5.5	5.5	21.35	368	19.6	3.89	3.96	11.71
459	30	2019-09-24	3	59	167	21.1553	3	1	0	0	1	2	2	1	2.6	4.49	16.01	16.81															3.83	4.27	12.96				2.15	4.6	4.7	6.4	7.99	306	16.9	3.6	3.51	13.75	16.42
460	22	2019-09-02	2	55	170	19.0311	3	2	0	0	0	0	2	1	0.005	5.29	19.42	9.15															3.51	4.13	14.02				2.11	4.7	5.2	5.1	20.39	492	18.3	2.55	3.59	14.43	10.55
461	33	2019-08-22	3	51	159	20.1733	1	2	1	0	1	0	1	1	1.83	3.82	15.69	107.8															4.52	3.8	10.07		12.7	9.1	2.13	4.6	9.2	8.7	12.32	544	16.1	2.46	3.35	13.43
462	27	2019-08-17	3	74	167	26.5338	3	1	1	0	0	2	0	1	2.31	5.2	16.28	11.59															3.62	4.3	10.11		12.9	10.5	2.2	4.6	6.2	5.7				2.09	4.2	9.91
463	27	2019-08-21	2	58	168	20.5499	1	1	0	0	0	2	2	1	2.89	5.13	18.6	320.8															4.33	4.84	14.1		11.3	9.6	2.28	4.7	4.6	5.8	16.49	600	19	2.94	3.97	13.8
464	27	2019-08-24	2	61	165	22.4059	2	1	0	0	0	1	0	1	2.37	4.84	17.66	12.17															3.06	4.47	12.34		14.4	9	2.08	4.6	6	4.7	60.3	481	9	2.7	3.71	13.5	6.56
465	27	2019-08-23	2	54	165	19.8347	1	1	0	0	0	2	0	1	3.08	4.8	19.07	18.13															3.44	4.34	12.24		9.7	8.3	2.14	4.3	8.3	6.8	16.57	352	9	2.2	3.72	12.08	13.49
466	33	2019-08-27	2	48	163	18.0662	3	1	0	0	0	2	0	1	2.52	4.89	20.36							2.35									2.19	4.01	12.12					4.6	7.5	5.3	11.45	240	17.5	2.59	4.09	9.96	6.08
467	24	2019-08-31	2	55	174	18.1662	3	1	0	0	0	0	2	1	2.01	4.56	14.52	9.6															4.63	3.91	9.82				2.22	4.9	7.6	未测	11.78	180	18.4	0.695	4.03	11.43
468	29	2019-08-27	3	60	163	22.5827	3	1	0	0	0	1	0	1	4.53	4.87	18.74	10.81						2.25									5.39	4.04	13.68				2.13	4.7	6.5	6.4	10.8	473	16.8	5.64	3.67	12.24	8.02
469	28	2019-09-25	3	59	163	22.2063	3	1	0	0	0	2	0	1	4.41	4.79	15.01	11.93															2.5	5.04	9.84				2.4	4.7	7.2	7.4	14.96	424	19.1	1.13	4.89	9.3
470	28	2019-10-02	2	63.5	162	24.196	2	1	0	0	0	2	2	1	2.23	4.76	17.85	35.84															3.46	4.18	12.38		21.3	9.5	2.19	4.3	7.4	7.3				3.38	4.32	12.02	18.82
471	27	2019-09-18	3	65	170	22.4913	2	2	0	0	0	2	2	1	0.85	3.8	18.15	10.6															2.5	3.51	10.51				2.06	4.5	7.4	5.8	4.19	325	15.5	2.27	3.15	11.18
472	30	2019-09-08	2	52.5	159	20.7666	1	1	0	0	0	1	2	1	0.845	6.09	21.06	11.99															1.42	5.15	13.53				2.12	4.5	6.1	6.1				1.62	4.37	14.56	16.64
473	24	2019-10-21	2	43	150	19.1111	1	1	0	0	0	2	2	1	1.22	4.86	17.37	20.66															2.7	3.95	11.15					4.6	10.9	8.3	31.64	495	19.5	3.03	3.94	12.77	15.67
474	37	2019-09-18	3	59	161	22.7615	3	2	0	1	0	2	0	1	0.472	4.98	14.95	8.6															0.919	4.57	10.26				2.28	4.9	10.3	9.5	8.27	218	8.4	1.21	3.95	9.71	5.48
475	32	2019-09-21	3	63	160	24.6094	3	1	0	0	0	1	0	1	1.94	4.73	15.32	5.57															2.61	4.28	9.61		15.7	10.6	2.26	5.2	9.8	8.6	7.69	249	16.6	1.94	3.45	9.72
476	31	2019-09-27	2	43	150	19.1111	1	1	0	0	0	2	0	1	3.59	3.95	16.88	6.68						2.32					0.54	3.8	1.88	1.65	2.21	4.03	15.08				2.06	4.5	8	6.5	12.97	350	18.9	3.84	4.03	15.36
477	25	2019-09-27	2	54	166	19.5965	1	1	0	0	0	2	2	1	1.45	4.61	16.13																1.72	4.01	11.14		30.7	9.3	2.13	4.4	6.9	5.4	24.12	394	17.6	1.32	3.91	11.18
478	28	2019-09-25	3	52	165	19.1001	1	1	0	0	0	2	0	1	2.4	5.3	18.65	25.36						2.27									1.37	4.23	12.74				2.05	5	5.5	6.6	11.09	196	15.3	1.18	3.76	13.43	14.44
479	29	2019-10-15	2	61	169	21.3578	1	1	0	0	0	0	1	1	2.49	5.26	17.12	56.31						2.26					0.56	3.43	1.51	1.62	2.68	4.6	13.03					4.4	6.4	6	26.54	361	17.1	4.13	4.24	12.84
480	35	2019-10-01	3	62	159	24.5243	3	2	0	0	1	2	2	1	1.52	4.99	12.39	6.96															2.71	4.17	10.28		25.2	9.9	2.29	4.3	9	8	17.35	314	17.7	2.94	3.67	10.6
481	28	2019-09-25	3	50.5	162	19.2425	3	1	1	0	0	1	0	1	3.95	4.69	16.44	5.78															3.08	3.9	10.93		7.7	10.6	2.05	4.6	6.7	5.7	4.67	208	15.9	2.76	2.93	11.71
482	25	2019-09-29	2	63	162	24.0055	1	1	0	0	0	2	2	1	1.97	4.87	14.3	5															2.55	3.97	9.03				2.02	4.7	5.7	6	7.24	264	17.9	1.75	3.57	10.26
483	25	2019-10-15	3	45	163	16.937	2	1	0	1	0	0	2	1	0.731	4.7	18.61	11.67															2.04	3.58	13.69				2.14	5.2	6.5	4.6	12.11	288	16.7	1.91	3.11	13.87
484	25	2019-10-08	2	65	164	24.1672	1	1	0	0	0	0	2	1	0.942	5.17	21	12.2	16.2	14.9				2.47									3.07	4.33	10.75		7.5	8.4	2.16	4.4	6.5	5.5	6.17	289	13.4	2.26	3.22	11.16	15.8
485	39	2019-10-09	1	61	160	23.8281	1	1	1	0	0	2	2	1	1.31	3.97	13.51	9.71															0.952	3.83	8.98				2.29	5.5	8.9	10.3	12.59	290	17.2	0.874	4.27	9.55
486	24	2019-10-13	2	60	168	21.2585	3	1	0	1	0	2	2	1	1.63	4.84	19.55	11.83															3.91	4.62	13.36				2.29	4.7	5.9	5.1	7.7	532	12.9	2.61	4.33	13.4	8.74
487	24	2019-11-10	1	45	162	17.1468	1	1	0	0	0	1	0	1	1.56	5.1	18.44	8.89						2.21					0.59	3.56	1.55	1.83	2.63	4.9	12.96				2.11	4.8	4.8	8.1	15.45	452	15.6	3.77	4.27	13.83	8.66
488	26	2019-10-18	2	65	167	23.3067	3	1	0	0	0	2	0	1	2.28	5.82	18.94	8.98															2.26	4.74	13.2				2.21	5.4	7.5	6.4	11.26	514	12.8	2.23	4.05	12.17	6.62
489	28	2019-11-15	3	49.8	157	20.2037	2	1	0	0	0	2	2	1	2.16	5.19	13.79	12.1						2.37					0.94	4.75	1.98	2.33	2.47	3.82	12.64				2.06	4.6	8.4	6	12.29	363	16.1	3.93	4.26	11.25
490	32	2019-10-24	2	78	164	29.0006	2	1	0	0	0	1	1	1	5.29	6.31	16.48							2.3									4.81	4.88	13.58				2.33	4.7	7.9	7.9	22.67	311	19.4	2.9	4.53	15.98
491	29	2019-10-18	3	84	170	29.0657	2	1	0	0	0	1	2	1	2.42	4.62	13.55	72.37															3.26	4.33	12.25		27.6	10.6	2.38	4.9	8.7	6.3				2.98	4.06	13.08
492	26	2019-11-01	3	44	158	17.6254	3	1	0	0	0	1	0	1	2.94	4.97	18.04	32.96															4.45	3.78	12.97		16.2	10.3	2.19	5.2	？	？	11.93	286	16.3	3.94	3.1	15.93
493	28	2019-10-20	3	62	166	22.4996	3	1	0	0	0	1	0	1	2.96	5.02	16.31																3.81	3.76	12.71		11.6	7.8	2.12	4	5.4	3.8	25.78	413	12.9	2.91	3.44	11.48	7.59
494	23	2019-11-01	2	58	165	21.3039	2	1	0	1	0	1	1	1	1.67	6.03	18.12	5															1.27	4.19	12.93				2.26	4.6	6.2	5.6	4.94	351	14.8	1.07	3.65	12.92
495	26	2019-11-18	3	61	160	23.8281	3	1	0	0	0	2	2	1	4.7	4.59	12.52	11.4	4.2	10.9				2.19					1.73	3.28	0.85	2.13	3.69	3.86	11.43		11.3	8.8	2.23	5.3	7.7	6.1	5.46	229	16.8	1.86	4.01	12.21
496	31	2019-11-14	2	68	168	24.093	3	2	0	0	0	1	1	1	2.77	4.34	13.5	9.61															3.92	3.55	10				2.21	4.3	7.4	5.6	7	380	14.8	3.62	3.63	10.47
497	33	2019-11-12	3	75.2	161	29.0112	2	1	0	1	0	2	2	1	2.61	4.81	14.94	520.4						2.14					3.16	4.9	1.12	3.23	3.39	4.05	10.28				2.23	4.3	9.8	7.6	23.53	464	12.9	3.09	4.17	9.75
498	24	2019-11-17	2	45	162	17.1468	3	1	0	0	0	2	2	1	1.18	4.44	15.38	10.32						2.24									3.1	3.7	13.03				2.15	4.4	6	4.8	1.06	393	4.5	2.51	3.93	14.28
499	36	2019-12-05	2	79	167	28.3266	2	1	0	0	0	2	0	1	1.39	5.32	13.72	7.13						2.3									1.72	3.65	9.74				2.24	5.3	7.7	7.9	18.05	347	17.4	1.97	3.61	10.81
500	28	2019-11-27	2	45	158	18.026	3	1	0	0	0	2	0	1	1	5.58	19.45	10.31						2.17					0.66	3.24	1.55	1.45	1.41	3.62	10.79				2.16	4.8	6.7	6.1	22.23	424	16	1.71	3.26	10.31
501	25	2019-12-20	2	70	167	25.0995	2	1	0	0	0	2	0	1	0.778	5.56	14.01	7.85															2.21	4.67	11.54				2.2	4.8	6.8	7	3.28	242	3.5	1.66	4.86	11.95
502	24	2019-12-22	2	50	163	18.8189	2	1	0	1	0	2	0	1	1.11	5.33	15.42	14.12															2.86	4.17	11.69				2.26	4.5	8.8	7	17.08	491	10.8	3.01	4.22	9.63
503	25	2019-12-16	2	60	160	23.4375	3	1	0	1	0	2	0	1	4.54	4.57	20.75	448.4															1.12	4.65	15.25				2.17	4.6	6.8	5.6	5.43	371	10.8	2.86	3.75	14.04
504	31	2019-12-28	2	55.5	153	23.7088	3	1	0	0	0	2	0	1	2.96	4.87	13.56	16.17															4.39	4.01	11.58				2.05	4.2	6.1	4.9	7.01	440	18.7	3.84	3.66	8.65
505	30	2020-01-10	3	52	165	19.1001	2	2	0	1	0	2	0	1	2.5	4.98	17.23	10.83															3.86	3.75	14.36				2.09	4.5	7.7	7	12.09	381	17	3.67	3.35	13.26
506	32	2020-01-16	2	61	165	22.4059	3	1	0	0	0	1	2	1	1.66	5.24	17.9	5.72															3.58	4.03	12.21		15.1	8.8	2.15	4.7	9.2	9	23.16	534	19.7	1.95	3.43	14.55	9.53
507	28	2020-01-26	2	60	160	23.4375	2	1	0	0	0	0	2	1	1.94	5.43	15.93	21.74															1.53	4.17	13.78				2.04	4.2	9.1	9.2	38.83	281	20	2.7	4.14	13.89	14.01
508	34	2020-02-11	2	50	160	19.5312	3	2	0	0	0	2	2	1	1.75	4.25	13.73	14.47															2.31	3.61	11.31				2.13	4.8	7.1	5.5	4.84	316	12	2.76	3.31	13.04
509	26	2020-02-10	2	60	160	23.4375	3	1	0	1	0	1	2	1	1.78	5.77	16.47	10.36						2.38					0.91	3.89	1.36	2.28	1.37	4.98	12.1				2.17	4.7	10.7	8.9	7.67	669	>20	1.67	3.7	13.5	9.56
510	26	2020-02-08	2	50	164	18.5901	3	1	0	0	0	2	2	1	2.21	4.74	16.68	7.91						2.18									0.383	4.04	11.31					4.7	6.5	6.4	17.2	330	>20	0.643	3.86	11.84
511	32	2020-02-28	2	54	163	20.3244	2	2	1	0	0	2	0	1	1.94	4.66	15.75	9.57						2.31					2.01	5	2.05	2.44	2.6	4.12	12.08					4.3	6.8	5.5	21.63	332	15.6	3.13	4.37	12.44
512	29	2020-02-28	3	58	168	20.5499	3	2	0	0	0	2	2	1	1.93	4.74	16.98	11.7															3.53	3.47	13.66				1.99	4.4	6.9	5.8	10.71	414	17.2	4.36	3.59	13.85	16.93
513	29	2020-03-22	3	54	162	20.5761	3	1	0	1	0	1	2	1	4.12	4.22	15.38	5															2.04	4.19	16.93				2.09	4.6	8.2	6.2	12.04	479	>20	2.77	4.19	14.29
514	24	2020-03-25	2	65	158	26.0375	3	1	0	0	0	2	2	1	2.41	5.02	16.72	39.01						2.3					1.39	3.94	1.29	2.51	1.79	4.67	13.41				2.25	4.6	7.7	4.1				3.75	4	13.27	30.94
515	27	2020-03-25	3	59	160	23.0469	3	1	0	1	0	1	0	1	2.91	4.1	16.44	7.91															3.7	3.05	13.15				2.16	4.8	9.4	9.4	16.43	364	18.5	3.88	2.76	13.1	10.91
516	27	2020-03-27	3	59	166	21.4109	3	1	0	0	0	2	0	1	1.81	5.84	22.66	7.18															2.27	4.22	15.53				2.15	5.5	7.7	6.4	4.88	326	18.4	1.79	4.01	15.46	9.37
517	32	2020-04-08	2	58	163	21.83	3	1	0	0	0	1	0	1	2.27	4.89	12.84	5.15															2.73	4.43	12.27					4.6	6.9	6.3	4.44	319	8.7	2.26	3.5	11.17
518	24	2020-05-05	3	46	168	16.2982	2	1	0	0	0	2	2	1	1.24	4.77	17.98	535.1															2.15	3.54	13.97				2.16	4.5	5.9	4.9	15.92	302	>20	3.22	3.69	12.95	213.6
519	25	2020-04-11	3	51	160	19.9219	1	1	0	1	0	1	1	1	1.67	4.85	18.17	6.02															1.91	4.05	15.27				2.15	4.6	7.4	5.9				1.68	4.07	13.2
520	29	2020-04-09	3	52	163	19.5717	3	1	0	0	0	2	2	1	0.941	5.04	16.2	13.42															1.17	4.23	14.28				2.14	4.2	7.3	5.6	14.94	425	18.4	0.929	4.47	13.77	13.65
521	25	2020-04-22	3	66	165	24.2424	2	1	0	0	0	2	0	1	1.96	4.56	16.39	28.28	20.3	13.2				2.36					1.2	3.23	0.81	2.15	2.55	3.84	12.26		5.3	8.9	2.06	4.8	7	5.8	7.21	318	16	2.02	3.54	10.91	13.39
522	39	2020-04-20	3	55	171	18.8092	3	1	0	0	0	2	2	1	2.03	3.68	16.37	9.17															0.458	3.14	13.27				2.08	4.8	7.6	7.5	17.09	244	16.2	0.739	3.36	13.09
523	35	2020-04-25	3	54	160	21.0938	3	1	0	1	0	2	0	1	1.61	4.07	15.06	7.83						2.16					1.92	4.32	2.06	2.08	1.25	3.57	12.27					4.6	7.3	6.3	12.42	144	11.1	2.22	3.25	12.44
524	30	2020-04-30	3	44	164	16.3593	3	1	0	0	0	1	1	1	2.81	3.87	16.98	8.4	18.3	14.5				2.49					0.76	4.83	2.14	2.33	3.12	3.97	13.19		11.5	7.6	2.18	4.4	7.9	8.5				3.52	3.61	11.05
525	26	2020-06-10	3	50	160	19.5312	2	1	0	1	0	1	0	1	2.76	4.16	15.25	11.71						2.14					0.57	3.09	1.33	1.62	2.4	3.55	14.44				2.06	4.8	5.5	6.3	13.96	322	18.3	4.33	3.16	13.23
526	27	2020-05-18	2	58	166	21.048	1	1	0	0	0	2	2	1	1.85	4.34	14.95	6.62															2.33	3.63	14.7				2.02	4.1	7	4.7	5.4	342	4.6	7.25	3.75	14.42
527	32	2020-06-28	3	55	155	22.8928	3	1	0	0	0	2	0	1	1.31	3.84	12.7	29.07															1.8	4.13	11.76				2.08	4.3	6	6.6	13.25	357	18.3	1.71	3.58	10.5	14.69
528	32	2020-05-20	1	54	165	19.8347	3	1	0	0	0	1	1	1	3.71	4.25	15.09	11.46															2.26	3.7	12.4					5.7	10.9	7.4	38.8	208	18.5	2.09	3.38	9.85	10.38
529	25	2020-07-04	2	65	165	23.8751	2	1	0	0	0	2	2	1	2.04	5.27	14.32	11.51															2.37	4.16	12.41				2.22	4.8	7.3	5.7	14.05	326	19.9	3.07	3.63	11.58
530	30	2020-07-05	3	51	158	20.4294	3	1	0	0	0	1	1	1	1.45	4.17	15.28	38.79															3.1	3.74	13.14				2.13	4.1	7	6.5	7.93	297	17.1	2.18	3.37	12.76
531	29	2020-06-11	2	63	160	24.6094	1	1	0	0	0	2	2	1	1.18	4.9	19.35	16.16															1.16	3.81	15.85				2	4.6	6.7	6.5	25.66	257	16.6	1.89	3.95	11.83	7.56
532	30	2020-06-21	2	65	163	24.4646	2	1	0	0	0	1	1	1	1.21	4.88	18.33	13.11															2.25	3.27	12.74				2.04	4.8	9.5	7.9	1.4	244	15.4	2	2.6	11.46
533	34	2020-06-29	2	63	165	23.1405	3	1	0	0	0	1	2	1	2.17	5.01	15.76	20.14															3.03	3.89	11.79				2.14	4.1	7	8	6.33	333	18.1	1.45	4.7	10.36	9.31
534	27	2020-07-06	3	55	160	21.4844	3	1	0	0	0	1	2	1	3.56	4.29	14.36	6.79															3.06	4.08	10.7				1.95	4.7	8.6	6.8	5.66			0.34	3.73	10.02	6.58
535	25	2020-06-28	2	52	155	21.6441	2	1	0	0	0	0	2	1	1.71	4.83	15.75	7.7															1.76	3.92	12.22				2.06	4.9	6.9	6.1	19.81	255	17	2.39	3.8	13.04
536	25	2020-07-01	2	65	160	25.3906	2	1	1	0	0	2	2	1	1.58	5.42	15.91	18.31															0.824	4.07	15.02				2.17	4.4	7.7	5.4	3.26	231	4.7	0.95	3.82	14.79	9.42
537	31	2020-07-04	2	52	158	20.83	3	1	0	1	0	2	2	1	1.47	3.73	14.26	8.82															3.48	3.92	11.75				2.05	4.9	7.4	6.8	3.34	176	7.3	3.42	3.42	11.95	6.83
538	25	2020-07-19	2	65	165	23.8751	3	1	0	0	0	2	2	1	1.18	4.62	16.43	7.55															3.08	3.9	12.08				2.11	5	6.6	4.9	18.17	394	17.4	2.3	4.01	11.19	7.7
539	37	2020-08-01	2	53	158	21.2306	3	1	0	0	0	2	0	1	1.05	3.78	14.44	12.38						2.13									1.52	3.81	13.66				2.1	4.2	7.7	6.2	10.27	224	17.5	2.05	3.8	12.61
540	30	2020-07-30	2	45	160	17.5781	2	1	0	0	0	1	0	1	5.38	4.86	15.02	201.5															0.679	4.52	17				2.16	5.2	9.6	6.9	18.21	439	18.5	0.255	4.09	14.79
541	27	2020-07-31	1	48	163	18.0662	1	1	0	0	0	2	2	1	5.33	4.6	16.51	116.9															3.08	3.16	14.88				2.16	4.8	7.8	5.7				4.79	3.42	8.34
542	25	2020-07-23	2	44	158	17.6254	2	1	0	0	0	2	2	1	1.7	4.17	19.6							2.15					0.71	4.11	1.72	2.04	3.03	3.85	14.22				2.17	4.4	6.8	6.3				3.21	3.61	14.65
543	26	2020-08-07	3	55	158	22.0317	3	1	0	0	0	1	2	1	2.14	4.32	17.15	13.92															1.6	3.62	14.34				2.07	4.5	7.5	6	23.22	404	18.7	2.24	3.37	14.49
544	29	2020-08-10	2	65	158	26.0375	2	1	0	0	0	1	1	1	1.51	4.15	14.37	11.43						2.21					1.47	5.12	1.65	2.91	1.04	3.76	12.18				2.13	5	8.2	6				2.1	3.27	11.69
545	26	2020-08-18	2	47	160	18.3594	2	1	0	0	0	1	0	1	1.02	4.27	19.17																1.66	4.11	15.22				2.26	4.6	7.4	6.8	9.27	427	18.1	1.62	3.55	14.52
546	32	2020-08-11	3	68	162	25.9107	3	2	0	0	0	2	2	1	2.34	3.95	13.37	7.04															3.3	3.9	11.8				2.15	5.5	9.3	8.2	33.33	371	19.2	3.43	3.09	10.14
547	27	2020-08-18	2	54	158	21.6311	2	1	0	0	0	2	0	1	4.33	3.88	17.67							2.13					1.36	3.78	1.4	1.94	1.01	3.52	15.9				2.05	4.9	5.9	5.7				5.34	4.47	14.92
548	29	2020-08-20	3	57	165	20.9366	3	1	1	1	0	2	0	1	3.22	4.81	18.23	10.33															3.91	4	13.08				2.13	4.4	5.9	6	13.44	272	>20	3.23	3.93	11.52	10.31
549	27	2020-08-23	2	58	164	21.5645	1	1	0	0	0	2	2	1	1.08	3.9	16.59	6.36															1.35	4.25	15.03				2.11	4.5	7.9	6.7	23.03	334	19.5	1.92	3.64	14.36	7.4
550	28	2020-08-20	1	46	155	19.1467	2	1	0	0	0	2	2	1	3.06	4.24	14.91	7.32															2.91	3.31	10.59					5.3	7.7	6.3	5.4	393	17.8	2.89	3.5	10.94
551	21	2020-08-31	1	65	168	23.03	3	2	0	0	0	2	2	1	3.07	4.8	16.68	10.6						2.33					0.45	3.6	1.47	1.82	3.11	3.85	13.17				2.24	4.3	4.4	4.9	45.92	597	17.7	1.73	3.37	14.29	8.28
552	32	2020-09-05	2	60	163	22.5827	3	2	1	1	0	1	2	1	1.4	3.71	13.3	11.01															2.89	4.27	12.54				2.12	4.7	8.4	7.8	7.81	420	15.7	2.22	3.31	12.11
553	29	2020-09-30	3	54	160	21.0938	2	1	0	0	0	2	0	1	6.17	4.53	14.76	11.66															4.7	3.83	14.54				2.06	4.9	9.3	7.4	16.53	381	18.8	6.31	3.29	11.56
554	35	2020-10-12	3	63	160	24.6094	1	2	0	0	0	2	0	1	4.58	4.32	15.78	56.18						2.02					0.87	4.14	1.15	2.61	4.29	3.86	14.3				2.03	4.6	6.4	5.7				3.03	4.11	11.92	40.58
555	28	2020-09-06	3	60	160	23.4375	2	1	0	1	0	1	0	1	1.33	5.17	17.76	9.16															1.52	3.68	11.76				1.99	4	5.6	6	6.04	156	19.3	1.7	4.06	12.73
556	32	2020-09-09	1	72	160	28.125	1	1	0	0	0	1	2	1	0.703	5.45	18.61	8.29															2.25	4.05	12.83				2.22	5.2	8.4	6.8	19.09	186	17.9	1.31	3.73	13.03
557	27	2020-08-31	2	60	170	20.7612	3	1	0	0	0	1	0	1	1.08	6.02	15.31	5.5															1.66	5.3	12.91				2.16	5.1	5.4	6.2	7.01	404	19	1.6	4.86	12.11	7.97
558	30	2020-09-09	3	65	163	24.4646	3	1	0	0	0	1	0	1	1.58	5.28	15.82	9.92						2.18					1.5	3.05	1.49	1.15	2.41	4.63	13.05				2.11	4.8	7.9	7.3	22.33	344	19.2	2.63	4.58	13.33
559	32	2020-09-18	2	72	170	24.9135	3	1	0	0	0	1	1	1	3.14	4.33	16.92																2.21	3.87	14.18				2	4.9	7.5	6.9				1.8	4.09	15.07
560	34	2020-09-13	3	62	150	27.5556	3	2	0	0	0	2	1	1	2.65	5.17	15.27	5															1.23	4.15	10.99				2.12	4.8	8.7	9.2	5.33	157	9.2	1.51	4.23	10.08	5.73
561	26	2020-09-27	2	49	161	18.9036	3	1	0	0	0	1	2	1	3.72	4.18	16.3	26.36															2.67	3.61	14.17				2.04	4.6	6.5	5.5	5.89	350	19.4	2.43	3.7	14.47	11.27
562	25	2020-09-27	2	47	160	18.3594	1	1	1	0	0	2	2	1	3.82	3.89	16.22	12.94															1.65	2.98	13.81				2.13	4.6	6.2	6.2	20.24	327	18.7	2.19	3.19	14.03
563	31					21.48	3	2	1	0	0	2	0		1.98	3.08	17.7	328.3															0.762	4.5	11.64											0.783	3.68	12.55
564	31					20.69	1	1	0	1	0	1	2		29.87	4.92	24.97	191.9															3.51	4.13	14.02											2.55	3.59	14.43	10.55
565	32					23.74	2	2	0	0	1	2	2		19.9	3.25	16.89	0															3.13	3.95	14.25											2.01	3.79	13.09	10.6
566	38					25.39	3	1	1	0	0	2	2		13.42	3.91	19.79	6.45															2.67	4.06	18.04											3.13	3.68	11.38
567	30					20.7	1	2	0	1	0	2	2		2.06	3.25	18.39	481.9															1.35	3.94	9.68											1.26	3.58	10.95
568	27					19.98	1	1	0	0	0	1	0		10.14	4.65	12.89	414.5															2.06	3.58	13.33											2.5	3.55	12.6	7.28
569	31					19.72	1	1	0	0	0	2	2		9.79	4.79	12.67	230.5															0.937	3.67	10.16	11.71										0.839	3.42	10.96	13.17
570	24					23.53	1	1	0	0	0	1	1		8.92	5.69	11.71																0.719	3.99	11.98											0.731	3.7	12.98	11.31
571	30					18.29	3	2	0	0	0	2	2		8.76	4	16.73	6.89															0.354	4.52	11.05											0.287	4.8	12.1	8.78
572	28					19.53	2	1	0	0	0	1	2		8.46	4.58	19.22	22.99															2.09	4.75	13.62											1.7	4.19	11.57	13.69
573	28					20.28	1	1	0	0	0	0	2		8.27	5.66	19.21	293.5															2.57	3.68	14.65	11.44										4.05	3.64	11.72
574	30					24.22	2	1	0	0	0	2	0		7.95	4.84	18.82	0															1.12	4.08	13.01											1.21	3.86	13.37	13.28
575	31					22.89	2	2	0	0	0	2	2		7.68	4.04	16.02	64.99															0.602	4.47	14.56											0.923	4.57	12.42
576	32					18.82	2	2	0	0	0	2	2		7.57	5.39	17.36	144.4															0.558	4.41	14.56											0.214	3.91	16.82	8.66
577	22					20.76	2	1	0	0	0	2	0		6.9	4.4	20.41	578.3															0.574	5.28	16.57											0.435	4.85	14.32	11.4
578	28					21.6	1	1	0	0	0	1	1		6.73	5.8	16.87	6.2															1.51	4.05	16.32											1.01	3.65	16.6
579	29					18.29	1	1	0	1	0	2	2		6.72	4.63	15.24	91.78															1.03	3.71	12.98											1.04	2.99	13.36
580	37					25.71	1	2	0	0	0	1	1		6.56	4.3	13.51	123.2															1.27	4.74	12.64											1.05	4.38	13.48
581	34					19.72	3	1	0	0	1	0	2		6.24	5.05	14.67	21.85															3.34	3.9	13.84											1.68	3.7	14.46	21.66
582	34					18.73	2	2	0	0	0	1	2		6.03	4.36	15.39	21.54															0.989	4.06	14.33	10.08										0.722	3.64	12.98	12.35
583	31					21.83	2	1	0	0	0	1	1		5.94	5.3	15.78	155.6															0.577	4.96	14.18	11.83										1.17	4.03	13.69	8.53
584	32					24.35	2	2	0	0	0	1	1		5.93	4.58	13.93	8.36															1.29	4.11	10.8											1.19	3.89	12.95
585	24					29.3	2	1	0	0	0	2	0		5.72	4.59	13.05	7.68															0.901	3.73	13.96											1.68	3.68	13.46	8.28
586	28					24.22	2	2	0	0	0	2	0		5.65	4.21	12.35	59.58															1.19	3.96	12.34											1.15	3.25	9.43
587	33					17.22	2	2	0	1	0	1	1		5.53	4.59	13.63	7.95															3.91	4.34	14.42											3.82	4.46	14.7	13.47
588	31					22.31	2	2	0	0	0	1	2		5.29	4.79	13.34	11.92															0.844	4.3	13.4											1.26	3.99	11.62	5.7
589	24					23.23	2	3	0	1	0	2	0		5.2	4.31	12.28	17.5															0.919	4.57	10.26											1.21	3.95	9.71	5.48
590	25					19.95	2	1	0	1	0	1	1		5.04	5.9	16.95	165.9															1.67	3.78	13.55											3.51	3.48	12.94
591	29					28.52	2	1	0	0	0	1	1		5.03	5.77	15.54	8.67															0.998	4.61	16.7	20.8										1.13	5.17	15.58	22.1
592	29					24.61	1	2	1	0	0	2	0		5.01	4.85	16.59	446.1															3.7	3.17	14.87	18.96										1.56	3.49	15.43
593	35					19.83	2	2	0	0	0	2	0		5	4.88	17.98	29.5															1.63	4.41	12.23	14.73										1.44	4.29	11.75	8.08
594	27					19.07	1	2	0	0	0	2	2		4.94	5.79	14.39	7.15															0.827	3.99	11.23											1.04	3.79	11.18	9.91
595	33					27.06	2	2	0	1	0	0	2		4.92	4.59	19.57	18.78															1.07	3.92	11.34											0.882	3.91	11.84	12.71
596	28					21.23	2	1	0	0	0	2	0		4.86	5.13	15.01	320.4															2.11	3.74	12.1											0.947	3	13.32
597	25					21.08	3	1	0	0	0	1	0		4.77	6.37	14.06	13.82															1.03	4.06	11.65	11.26										1.46	3.87	11.41
598	31					28.23	2	1	0	0	0	1	1		4.73	5.22	14.51	0															0.713	3.49	17.47											1.22	3.89	15.66
599	21					20.89	2	1	0	0	0	2	2		4.66	5.49	14.81	5															1.43	3.73	10.75											1.22	3.24	12.93
600	32					19.72	3	1	0	0	0	0	1		4.62	4.54	17.79	135.3															1	4.47	15.45	8.98										1.49	4.22	15.21	10.05
601	39					22.68	3	3	0	0	0	2	2		4.6	3.95	13.39	0															1.52	3.4	13.38											1.5	3.04	14.05
602	29					19.2	1	1	0	0	0	2	2		4.55	4.1	14.98	6.95															1.34	4.35	15.83											1.6	5.5	16.05
603	29					18.22	1	1	0	0	0	1	0		4.37	3.47	13.3	6.37															1.38	4.25	14.97											1.01	3.91	15.92
604	31					22.77	1	2	0	0	0	2	0		4.28	4.35	12.18	250.2															1.97	4.28	13.37											2.54	3.96	13.93
605	31					25.22	1	1	1	0	0	2	0		4.27	4.41	12.78	5															1.02	4.25	14.93	11.32										2.58	4.35	13.46	13.46
606	25					20.43	2	1	0	0	0	2	2		4.26	6.44	19.78	8.11															1.12	5.81	10.29											2.51	4.44	11	13.9
607	36					17.29	1	2	0	0	0	2	2		4.26	4.58	18.54	8.14															1.37	4.09	11.57											1.94	3.9	11.48	8.62
608	36					23.56	1	2	1	0	0	2	2		4.23	5.32	19.66	9.38															0.733	3.91	12.04	15.52										0.786	3.65	11.43	12.21
609	30					25.91	2	1	1	0	0	0	0		4.21	5.55	15.55	11.18															2.5	4.25	9.82											2.39	3.97	10.32
610	32					24.84	1	1	0	0	0	1	0		4.19	5.55	15.84	7.95															2.56	4.94	10.84											2.97	4.76	10.51	16.84
611	28					23.44	1	1	0	1	0	1	1		4.18	5.02	16.9	8.84															1.08	4.62	14.4											0.871	3.9	13.14
612	38					22.27	1	2	0	0	0	1	1		4.3	4.4	15.74	5.53															1.87	3.69	15.09											3.05	3.96	14.63	13.98
613	35					19.47	3	2	0	0	0	2	2		5.1	4.03	14.61	9															2.52	4.28	12.77											2.38	3.77	13.35	16.56
614	33					22.66	1	2	0	0	0	2	0		4	5.03	15.03	10.19															2.47	4.47	16.72	11.72										3.35	3.83	16.81	8.66
615	25					21.76	1	1	0	0	0	2	2		3.96	4.98	15.56	9.83															1.82	4.09	13.09											0.512	4.12	11.83	54.85
616	33					19.05	1	2	0	0	0	2	2		3.81	5.84	14.4	5.92															0.761	3.63	12.25											0.63	3.54	13.18	5.43
617	36					24.34	1	1	0	1	0	1	1		3.78	4.52	17.27																2.61	4.38	12.5											2.23	3.82	12.91
618	26					19.53	1	1	0	1	0	1	2		3.77	5.39	15.52	7.57															3.73	3.44	10.25											3.1	3.09	9.79
619	32					25	2	2	0	0	0	2	2		3.75	4.56	13.86	11.77															0.901	3.29	10.66	47.52										1.06	3.22	9.96	21.7
620	31					22.66	2	1	0	0	0	2	2		3.73	4.82	18.19	10.7															1.46	3.86	14.06	16.26										1.8	3.36	11.64	9.58
621	30					21.88	1	2	0	0	0	2	0		3.58	4.53	11.47	5															1.28	4.07	12.93											2.06	4.73	9.42	10.41
622	24					22.77	2	1	0	0	0	2	2		3.57	5.47	17.5	277.2															1.02	4.13	11.08											1.07	3.3	11.86	10.99
623	25					24.46	1	3	0	0	0	2	2		3.48	5.34	18.58	13.2															3.07	4.33	10.75											2.26	3.22	11.16	15.8
624	27					21.99	1	1	0	1	0	1	1		3.46	5.39	20.02	8.42															1.1	3.07	14.1											1.52	3.29	14.61
625	31					21.61	2	1	0	0	0	2	2		3.45	4.16	16.24	7.8															2.49	3.91	11.11	7.92										1.94	3.81	10.81
626	30					22.83	2	1	0	0	0	1	0		3.45	4.52	14.58	11.29															1.84	5.17	14.82	8.93										2.57	4.3	15.11	12.4
627	26					21.09	1	2	0	0	0	2	0		3.44	5.49	19.38	22.66															2.21	4.15	11.93											2.45	3.86	11.13
628	36					24.14	1	2	0	0	0	2	0		3.39	5.14	17.07	11.14															1.73	4.19	12.61											1.59	4.02	14.45
629	24					22.83	1	1	0	0	0	0	0		3.37	5.67	14.74	10.19															1.53	3.9	14.21											2.5	3.91	14.33
630	29					23.44	3	2	0	0	0	2	0		4.44	4.47	16.34	6.14															1.41	3.62	10.79											1.71	3.26	10.31
631	27					20.96	1	2	1	0	0	2	2		3.36	6.03	20.45	12.14															1.58	4.1	11.76											1.77	4.29	11.71
632	27					22.96	1	1	0	0	0	1	1		3.34	5.78	14.03	580.5															1.93	3.81	14.37											1.42	3.69	13.14	9.22
633	31					19.84	2	1	0	0	0	2	0		3.3	5.4	16.51	36.85															1.72	3.2	11.22											1.75	2.6	10.15
634	26					20.31	1	1	0	0	0	2	0		3.29	4.41	15.75	8.27															7.09	4.24	14.54											2.42	3.36	14.61
635	37					24.44	1	2	1	0	0	2	0		5.33	4.92	18.48	17.58															3	4	13.07											3.84	3.96	11.17
636	30					23.83	1	1	0	0	0	2	2		3.24	5.21	18.54	463.7															0.472	50	24.29											1.96	3.85	8.75
637	26					20.31	3	2	0	0	0	2	2		3.18	5.45	17.81	13.95															2.34	4.45	12.28	7.15										2.07	3.83	11	5
638	26					20.45	1	1	0	0	0	1	2		3.16	4.94	14.91	5															1.35	4.25	15.03											1.92	3.64	14.36	7.4
639	30					25.39	1	1	0	0	0	1	2		3.16	5.77	16.12	12.5															1.66	5.3	12.91											1.6	4.86	12.11	7.97
640	24					28.58	1	2	0	0	0	2	2		3.15	4.82	15.21	589															0.983	4.15	11.84	15										0.851	4.06	11.88	17.03
641	37					28.04	1	2	0	0	0	2	2		3.13	4.88	13.82	7.6															1.84	4.06	12.8	9.22										2.49	4.24	14.37	12.97
642	29					18.65	3	1	0	0	0	1	2		3.13	4.21	14.74	11.9															3.01	3.56	14.17											1.89	3.6	15.4
643	24					19.23	1	1	0	0	0	2	2		3.1	5.13	19.29	15.61															1.4	3.2	10.27											2.82	3.01	10.94	10.47
644	32					25.39	2	1	1	0	0	2	2		3.09	4.73	19.68	6.91															1.14	5.26	10.68	9.67										1.46	3.71	10.47	8.75
645	32					20.03	1	2	0	0	0	1	1		3.07	4.98	14.43	5															3.18	3.68	13.05											3.03	3.65	14.95
646	33					22.66	1	3	0	0	0	2	0		3.05	4.39	11.71	8.56															2.17	4.06	13.44											4.43	4.51	14	12.64
647	26					27.47	1	1	0	0	0	2	2		3.03	5.04	16.79	15.94															2.37	4	12.82	7.68										2.55	3.22	12.75	12.59
648	26					18.52	1	2	0	0	0	1	0		3.03	6.08	15.34	7.88															1.63	4.49	14.06											1.82	3.83	13.3
649	36					23.11	2	1	0	0	1	1	1		3	5.1	16.96	13.38															1.16	3.81	15.85											1.89	3.95	11.83	7.56
650	27					22.86	1	1	0	0	0	2	0		2.98	4.19	15.73	10.07															2.06	3.85	12.18											1.96	3.35	10.95	11.76
651	31					19.53	2	1	0	1	0	1	0		2.97	4.35	15.25	13.38															2.64	3.9	13.72											2.83	3.77	12.42	15.28
652	30					20.31	3	1	0	0	0	1	1		2.88	4.63	15.18	10.92															2.25	3.27	12.74											2	2.6	11.46
653	31					24.8	1	2	0	0	0	2	0		2.84	4.09	12.76	10.02															2.7	3.95	11.15											3.03	3.94	12.77	15.67
654	27					23.51	1	1	0	0	0	1	0		2.84	4.99	19.49																1.92	4.51	13.85											1.99	3.99	12.73	5.64
655	26					26.03	2	2	1	0	0	1	0		2.84	4.69	15.34	11.72															1.8	4.22	7.48	14.1										3.34	4.17	9.11	17.4
656	29					27.27	2	2	0	0	0	2	2		2.84	4.91	13.63	6.51															1.86	3.97	12.69											1.5	3.63	11.57	8.91
657	25					20.07	1	1	0	0	0	1	0		2.82	4.97	17.24	10.45															0.82	4.75	12.99											1.54	4.59	12.19	18.46
658	26					21.45	1	1	1	0	0	2	2		2.81	5.54	19.45	15.86															2.15	3.54	13.97											3.22	3.69	12.95	213.6
659	31					21.67	1	2	0	0	0	1	0		2.8	3.77	14.23	8.98															1.28	4.04	12.31	12.03										2.63	4.2	11.14	13.3
660	25					24.84	2	1	0	0	0	2	0		2.8	4.48	15.96	5															1.35	3.91	12.54	20.85										2.96	3.8	11.35
661	28					19.47	3	1	0	0	0	2	2		2.78	4.87	19.07	71.01															4.02	3.71	14.47	10.03										2.6	3.91	13.76
662	30					22.58	1	2	0	0	0	2	2		2.77	4.32	15.53	7.68															2.68	4.47	11.33											2.29	3.27	10.03	9.97
663	32					20.76	1	2	0	0	0	1	1		2.76	4.44	16.19	12.32															2.34	4	12.29											2.57	4.76	13.65	13.9
664	35					24.8	2	2	0	0	0	2	2		2.76	4.63	15.99	9.32															0.952	3.83	8.98											0.874	4.27	9.55
665	23					18.73	1	1	0	0	0	2	2		2.75	4.95	16.69	7.8															1.07	3.13	15.32											0.952	3.21	15.21
666	32					15.43	1	3	0	1	0	2	0		2.74	5.53	16.89	13.56															2.89	4.16	12.78											1.9	4.11	12.04	14.85
667	38					17.87	2	2	0	0	0	2	0		2.74	4.69	16.97	7.77															1.52	3.68	11.76											1.7	4.06	12.73
668	30					27.34	3	1	0	1	0	1	2		2.74	5.1	15.52	7.44															0.21	4.68	12.18	5.35										1.02	4.99	9.75	10.84
669	27					23.92	1	2	0	0	0	2	2		2.74	4.33	17.58	6.28															1.8	4.1	11.24											2.79	3.72	9.15
670	29					25.1	2	2	0	0	0	2	2		2.73	5.65	15.4																3.53	4.91	12.07											3.7	4.01	11.41	10.98
671	35					23.23	1	2	0	1	0	1	1		2.72	4.31	11.94	9.28															2.41	4.01	14.19											2.56	3.35	11.93
672	31					23.92	1	2	0	1	0	2	2		2.71	4.71	14.78	12.86															1.51	4.2	13.12											1.53	3.71	13.41
673	27					17.31	1	1	0	0	0	0	2		2.7	4.93	18.12	11.3															1.9	4	14.6	6.58										2.17	3.64	12.74	6.36
674	30					20.42	2	1	0	1	0	2	2		2.7	4.45	15.23	107.7															1.48	4.54	10.73											1.72	5.17	10.03	10.75
675	26					24.22	1	1	0	0	0	1	1		2.65	5.05	14.03	6.31															2.78	4.71	15.91											2.65	3.92	13.9
676	32					18.29	2	3	0	0	0	1	1		2.64	4.25	14.66	10.76															2.42	3.77	12.85											4.14	3.76	14.65	13.9
677	42					26.17	1	2	0	0	0	2	2		2.62	4.54	14.43	12.53															0.885	4.03	13.87											1.24	3.25	13.26	5.46
678	38					22.89	3	2	0	0	0	1	1		2.61	5.34	13.86	12.86															4.16	4.81	12.28											1.39	4.17	11.47
679	32					19.95	2	1	0	0	0	2	2		2.61	5.15	20.2	19.51															2.05	4.13	15.87	11.34										1.98	3.81	12.54	12.12
680	25					19.72	1	1	0	0	0	1	2		2.59	5.52	18.51	9.84															1.61	3.94	11.04											1.19	3.51	10.53	18.51
681	31					22.82	1	2	1	0	0	1	0		4.6	4.76	17.47	6.94															2.06	4.24	11.79											2.47	3.53	12.32	8.53
682	29					23.56	1	2	0	0	0	2	2		2.56	5.08	16.14	7.86															2.48	3.83	11.19											3.3	3.56	11.58
683	30					18	2	1	0	1	0	2	0		2.55	4.01	14.07	10.42															2.18	3.74	14.57											2.55	3.55	14.48	21.76
684	28					29.3	2	1	0	0	0	2	0		2.55	4.8	13.43	9.52															3.48	3.92	11.75											3.42	3.42	11.95	6.83
685	32					24.65	1	2	1	0	0	0	0		2.54	4.47	14.15	8.62															3.08	4.46	13.01											1.86	4.61	13.6
686	24					23.62	1	1	0	1	0	2	2		2.54	4.85	15.53	9.49															1.28	4	10.74											1.63	3.86	10.22
687	37					22.15	1	2	0	0	0	1	2		2.53	4.26	14.74	1293															3.5	4.18	12.97											2.38	3.4	11.99	6.67
688	30					26.93	2	2	0	1	0	2	0		2.51	4.67	18.69	5															2.47	4.26	13.04											2.44	4.2	15.59	9.09
689	28					21.09	1	1	0	0	0	1	1		2.49	5	14.78	14.5															2.7	4.32	13.21	13.43										2.47	3.31	12.89	7.26
690	29					17.58	1	1	0	0	0	2	0		2.47	4.79	15.1	16.53															2.71	4.17	10.28											2.94	3.67	10.6
691	28					20.96	2	1	0	0	0	1	1		2.44	4.97	15.8	9.43															2.3	4.28	13.31											2.04	3.58	11.99	11.71
692	34					21.27	2	1	0	0	0	2	2		2.42	4.63	18.37	14.37															2.15	4.51	12.83											1.76	4.65	13.28	16.53
693	27					26.17	2	1	1	0	0	2	1		2.42	4.98	14.56																2.69	3.48	15.01											0.251	4.18	17.27	9.47
694	26					18.75	2	1	0	0	0	0	1		2.42	4.23	17.09	8.25															2.56	4.87	13.55	8.79										2.46	4.37	11.77	5.7
695	29					20.7	2	1	0	0	0	1	2		2.4	4.77	16.92	9.29															1.99	3.99	11.14											2.05	3.6	9.4
696	21					20.96	1	1	0	0	0	1	0		2.4	5.43	16.25	14.36															2.2	4.24	10.89	135.2										3.64	4.01	11.7	76.79
697	24					18.75	2	2	0	0	0	1	2		2.4	4.97	13.75	6.36															2.99	4.1	13.93	11.07										3.08	3.93	13.49	11.25
698	33					22.58	2	2	0	0	1	2	2		2.39	4.29	19.31	23.26															2.98	3.69	14.69	5										2.65	3.66	14.8	7.91
699	27					24.01	2	2	0	0	0	2	2		2.36	4.66	14.84	7.22															2.91	3.98	12.37											2.55	4.2	11.77
700	35					25.63	2	3	0	0	0	0	0		2.33	4.12	14.93	8.83															1.18	4.24	10.42											1.97	4.16	11.04	10.62
701	31					19.57	2	1	1	0	0	2	0		2.33	4.43	19.49	71.79															1.7	4.21	11.39											2.05	3.93	10.64
702	29					23.34	2	2	0	0	0	1	2		2.31	4.08	15.85																1.69	3.71	13.47											1.48	3.73	12.53
703	31					20.2	3	2	0	0	0	2	0		2.3	5.06	18.3	9.56															2.48	4.3	12.82											6.58	3.89	11.51
704	27					19.65	2	1	0	0	0	1	0		2.29	4.65	20.31	23.75															2.42	4.25	11.59											2.8	3.92	12.45
705	26					23.14	1	1	0	0	0	2	2		2.28	5.38	17.53	8.73															3.91	4.62	13.36											2.61	4.33	13.4	8.74
706	28					19.23	2	1	0	0	0	1	1		2.28	4.78	17.14	9.38															1.37	3.47	13.11											1.49	3.11	11.83	12.25
707	30					23.07	1	1	1	0	0	2	0		2.26	4.62	14.5	8.05															1.55	4.19	10.95											1.73	3.84	10.8
708	33					21.5	1	1	0	0	0	2	0		2.25	4.84	18.75	10.29															2.19	4.05	12.67											2.43	4.4	11.44
709	26					21.3	1	1	0	0	0	1	0		2.24	5.36	17.18	11.33															3.64	4.66	14.88											2.18	4.44	12.7
710	30					17.01	2	1	0	0	0	2	0		2.24	4.87	17.17	9.31															3.15	4.55	9.72	12.3										4.28	4.57	10.15	13.44
711	28					21.45	1	2	0	0	0	2	0		2.19	4.44	16.17	7.24															3.58	4.03	12.21											1.95	3.43	14.55	9.53
712	25					22.31	2	1	0	0	0	1	2		2.19	4.69	14.93	10.09															1.45	4.28	14.1											2.73	3.49	13.29	18.11
713	25					19.53	1	1	0	0	0	2	2		2.14	4.12	15.63	7.25															1.43	4.11	9.68											1.52	3.98	10.01
714	31					17.19	2	2	0	0	0	2	0		2.11	5.51	16.39	11.16															0.346	18.63	14.11											2.25	4.42	11.64	8.69
715	35					23.44	2	2	0	0	0	1	0		2.1	4.92	17.36	12.36															2.31	3.61	11.31											2.76	3.31	13.04
716	29					23.83	3	1	0	0	0	2	2		2.09	4.9	13.94																1.55	5.06	13.25	14.27										2.15	4.6	13.53	16.49
717	28					22.6	2	2	0	0	0	2	0		2.09	5.47	14.59	7.78															1.38	3.61	9.98	85.09										1.1	3.94	10.36
718	33					23.05	3	1	0	0	0	2	2		2.08	4.59	17.62	5.29															3.28	3.13	11.4											1.65	3.02	10.85
719	28					23.63	2	1	0	0	0	1	1		2.07	4.44	15.34	13.13															1.37	4.98	12.1											1.67	3.7	13.5	9.56
720	29					21.48	1	2	0	1	0	2	2		2.07	5.66	16.1	8.97															3.21	4.35	16.55	43.65										2.02	4.6	15.48	24.65
721	26					21.3	2	2	1	1	1	2	0		2.07	6.04	15.49	13.11															2.7	3.43	12.35											3.34	3.65	13.86	10.57
722	26					20.96	2	1	0	0	0	1	1		2.06	4.98	16.07	7.81															2.09	4.31	12.97	12.91										4.94	4.57	10.33
723	29					20	3	1	0	0	0	2	2		2.06	4.31	15.71	10.28															2.27	4.22	15.53											1.79	4.01	15.46	9.37
724	35					24.46	1	1	1	0	0	1	1		2.05	4.94	16.4	17.29															1.8	3.85	13.77											4.09	3.68	12.44	12.07
725	33					20.83	2	2	0	0	0	1	0		2.05	4.49	15.84	13.56															2.21	4.69	12.48											5.52	5.02	12.01	12.81
726	28					21.45	2	1	0	0	0	2	0		2.04	5.09	20.55	28.46															3.25	3.52	11.56											3.31	3.28	11.36	7.49
727	33					22.43	1	2	0	0	0	2	0		2.03	4.37	15.93	7.57															3.06	4.19	14.94											3.55	3.93	14.77	11.12
728	26					22.89	1	1	0	0	0	1	1		2.03	5.52	16.8	134.5															2.39	4.51	11.34	7.38										3.2	4.31	9.35	17.15
729	27					24.22	1	1	0	0	0	2	0		2.02	4.99	18.26	10.3															2.55	3.85	12.77											4.04	3.63	10.14
730	40					29.3	3	3	0	0	0	2	2		2	5.04	13.33	13.48															1.91	4.13	14.08											5.18	5.02	12
731	25					25.53	1	2	0	0	0	2	0		1.99	4.41	15.32	11.87															1.99	4.35	12.84											3.37	4.22	11.32	11.42
732	29					21.13	1	1	0	0	0	1	1		1.94	4.73	14.33	13.77															2.31	4.68	11.54	13.75										4.01	4.34	10.55	6.74
733	30					15.63	1	2	1	0	0	2	2		1.93	4.56	15.59	9.41															2.61	4.28	9.61											1.94	3.45	9.72
734	36					18.01	3	2	0	0	0	2	0		1.92	4.82	15.25																2.6	4.12	12.08											3.13	4.37	12.44
735	31					18.73	3	2	0	0	0	2	2		1.92	4.77	19.66	7.22															2.67	4.33	14.14											4.4	4.35	13.61	11.16
736	26					21.09	1	1	0	0	0	2	2		1.9	4.52	16.07	16.25															2.55	3.97	9.03											1.75	3.57	10.26
737	33					20.83	1	3	0	0	0	2	0		1.89	4.19	14.81	5															2.21	4.07	12.26											3.23	3.44	11.34
738	28					18	1	1	0	0	0	1	1		1.88	4.65	15.98	8.14															1.88	3.29	18.96											3.79	3.36	17.3
739	32					19.57	1	2	0	0	0	1	0		1.87	4.92	16.05	5															1.47	4.85	13.37	17.7										3.78	4.56	12.17	15.11
740	29					20.45	2	2	0	0	0	2	0		1.84	5.98	18.15	7.95															3.11	3.71	13.44											2.44	3.31	12.99
741	33					25.39	2	2	0	1	0	2	0		1.84	4.74	17.02	8.39															1.61	3.26	12.83											1.58	3.45	13.34
742	30					23.05	1	2	0	0	0	2	2		1.84	5.23	12.57	9.8															0.458	3.14	13.27											0.739	3.36	13.09
743	33					22.87	1	2	1	0	0	1	2		1.83	4.14	14.62	19.74															3.53	3.69	11.97											3.53	3.48	12.79
744	30					17.22	2	2	0	0	0	2	2		1.83	4.71	16.47	6.31															2.99	5.24	12.93											3.96	3.88	9.71	7.74
745	22					22.58	1	1	0	1	0	2	2		1.82	5.44	20.36	7.03															3.36	3.72	11.36											3.84	3.45	13.63	20.89
746	26					25.15	1	2	0	0	0	1	1		1.82	4.84	14.57	14.83															1.69	4.43	10.52											1.93	4.4	11.9
747	23					25.71	1	1	0	0	0	2	1		1.82	5.51	14.2	6.84															4.97	3.49	12.36	12.21										2.8	3.39	12.99
748	37					21.23	2	2	0	0	0	1	1		1.81	4.31	18.37																1.43	3.44	10.49											1.72	3.5	11.81	5.46
749	21					21.48	1	1	0	1	0	1	0		1.79	4.9	18.99	15.51															2.94	3.82	13.16											3.86	3.82	10.9	9.76
750	33					19.53	1	3	0	0	0	2	2		1.79	5.45	20.08	14.56															2.44	4.64	13.17											0.855	3.91	12.19
751	30					30.22	1	2	0	0	0	2	2		1.79	5.94	18.09	83.47															1.6	3.91	10.79											1.5	4.17	9.94
752	26					17.69	2	1	1	0	0	2	2		1.77	3.45	13.8	8.13															2	3.13	13.17											1.65	3.02	10.85
753	30					20.06	1	2	1	0	0	2	2		1.77	4.35	17.26	9.06															2.96	4.82	15.16											2.92	3.87	15.08	10.83
754	35					22.83	2	1	0	0	0	2	2		1.76	4.91	16.78	140.6															3.27	4.06	10.43											3.63	4.36	10.37
755	30					27.55	2	2	0	0	0	2	2		1.75	5.13	17.83	56.73															2.43	5.18	12.85											3.3	3.81	10.84	8.67
756	31					23.74	2	2	0	0	0	1	2		1.74	5.32	16.65	9.29															3.22	4.41	11.65											3.01	4.09	12.16	9.01
757	29					18.14	1	1	0	0	0	2	0		1.73	4.98	17.81	8.87															3.97	3.7	11.72											3.35	3.44	12.06
758	29					22.94	2	2	0	0	0	1	1		1.72	4.28	17.51	10.76															1.02	4.73	11.52											0.973	3.75	10.68
759	28					20.82	1	1	0	0	0	1	1		1.71	4.06	13.72	406.8															1.56	4.88	12.31											1.67	3.81	10.81
760	29					19.98	1	1	0	0	0	1	0		1.68	5.63	19.17	175.2															2.9	4.35	13.07											2.07	3.95	10.55
761	27					24.77	1	1	0	0	0	1	0		1.68	4.89	13.24	7.61															1.6	3.62	14.34											2.24	3.37	14.49
762	31					24.46	1	1	0	0	0	2	0		1.66	4.32	22.3	12.09															3.53	4.92	11.49											1.58	4.47	11.3
763	27					19.47	2	1	1	0	0	1	2		1.66	5.32	17.31	10.3															3.03	3.89	11.79											1.45	4.7	10.36	9.31
764	29					26.44	1	1	0	0	0	2	0		1.66	5.32	15.27	17.91															3.27	4.09	12.56											2.55	3.61	12.72	12.21
765	24					18	1	1	0	0	0	2	2		1.66	5.17	17.24	8.76															2.59	4.16	15.49	13.2										1.51	3.74	14.51	15.15
766	26					19.47	2	1	0	0	0	1	0		1.64	5.59	19.8	8.44															3.28	4.23	13.04	13.87										3.32	4.84	14.38
767	25					20.2	1	1	0	0	0	2	2		1.64	4.9	14.24	8.78															2.08	4.25	14.08	49.99										3.2	4.69	15.02	33.36
768	34					24.46	3	2	0	0	0	2	2		1.63	4.78	17.18	16.55															2.73	4.43	12.27											2.26	3.5	11.17
769	23					19.23	1	1	0	1	0	1	2		1.63	5.37	22	123.7															2.79	3.7	10.95											2.67	3.33	11.68	7.15
770	26					22.31	2	1	0	0	0	1	1		1.63	4.89	15.9	7.61															2.26	4.74	13.2											2.23	4.05	12.17	6.62
771	32					21.34	1	2	0	0	0	2	0		1.62	4.62	13.12	12.17															2.2	4.11	12.79	9.15										3.49	4.07	10.48
772	31					24.46	1	1	0	0	0	1	1		1.62	5.28	16.34	5.5															1.74	4.3	13.18											1.53	4.3	12.52
773	32					26.01	2	2	0	0	0	2	2		1.62	4.48	17.38	118.6															3.85	4.01	14.21											3.99	3.68	16.17	15.14
774	29					17.73	1	2	0	0	0	1	1		1.6	5.87	21.69	41.16															2.43	3.72	13.27											1.56	3.89	10.41	6.96
775	35					21.51	3	1	0	1	0	2	0		1.6	4.45	14.54	6.17															3.34	4.21	12.19											3.2	3.82	9.7
776	31					20.7	2	1	0	1	0	1	0		1.6	5.12	15.3	5															1.87	3.73	12.89											0.787	4.2	13.93
777	33					21.09	1	3	0	0	0	2	0		1.59	4.49	13.6	7.99															1.22	4.4	12.59											0.795	3.48	11.06	37.65
778	40					23.05	2	3	0	0	0	2	0		1.59	4.8	18.55	5.23															2.35	4.56	13.1											2.88	4.14	14.4
779	33					18.9	2	1	0	0	0	1	0		1.58	3.97	15.77	13.51															3.3	3.9	11.8											3.43	3.09	10.14
780	30					23.73	2	1	0	0	0	2	2		1.56	4.71	14.1	5															3.72	4.42	12.1											6.16	5.23	12.87	14.05
781	35					24.61	3	2	0	0	0	1	1		1.56	4.27	16.48	8.31															1.94	3.79	15.96											1.82	3.42	10.78
782	37					22.66	1	2	0	0	0	2	2		1.55	5.06	19.31	16.11															1.37	4.23	12.74											1.18	3.76	13.43	14.44
783	27					17.8	1	2	0	0	0	1	1		1.55	5.41	16.68	245.1															3.71	4.17	12.19											2.09	3.79	12.35
784	27					17.51	1	1	0	1	1	1	0		1.55	4.96	15.56	7.7															1.79	4.67	13.41											3.75	4	13.27	30.94
785	30					24.24	1	2	0	0	0	2	2		1.54	4.96	19.44	5															1.58	3.49	10.72											1.29	3.72	9.42
786	28					24	1	1	0	0	0	0	2		1.53	5.15	17.6																3.26	4.33	12.25											2.98	4.06	13.08
787	32					24.01	2	3	0	0	0	1	0		1.53	4.7	16.61	5															3.28	3.01	10.96	15.84										6.29	3.13	13.34	9.46
788	23					19.23	1	1	0	0	0	2	2		1.53	4.36	20.76	154.7															2.86	4.6	12.99											2.5	3.76	12.9
789	34					18.07	2	1	0	0	0	2	2		1.53	4.77	17.99	6.64															3.17	4.93	10.8	11.21										3.66	3.69	11.05	10.71
790	33					24.03	2	3	0	0	0	2	0		1.52	4.73	12.2	10.91															1.52	3.62	12.88	10.22										1.19	3.59	11.15	7.22
791	27					19.15	1	2	0	0	0	1	0		1.5	5.7	17.31	9.2															1.41	4.21	9.46											3.43	3.47	11.52	8.07
792	27					19.57	1	1	0	0	0	1	2		1.5	4.48	23.62	9.06															2.81	4.23	17.73											2.82	3.9	13.19
793	28					21.23	1	1	0	1	0	2	0		1.5	4.59	19.26	11.46															2.75	3.84	13.99											2.45	3.35	12.92
794	32					24.77	1	2	0	0	0	2	2		1.49	4.82	17.89	5															2.19	4.01	12.12											2.59	4.09	9.96	6.08
795	24					19.53	1	1	0	0	0	2	2		1.48	5.89	18.88	5.56															2.7	5.26	11.37											2.72	4.22	11.42	14.41
796	33					26.93	2	2	0	0	0	2	0		1.48	4.53	16.91	5.04															3.53	3.65	12.84											2.99	3.48	12.85	11.11
797	32					23.62	1	2	0	0	0	2	2		1.48	5.23	18.65	12.57															2.6	4.53	11.64	14.98										2.86	5.12	12.14	11.96
798	35					25.86	2	2	0	0	0	2	0		1.48	5.07	17.21	6.62															3	4.03	12.86											7.28	4.08	10.44	16.07
799	30					22.89	1	2	0	0	0	2	0		1.46	3.85	17.03	11.35															0.931	4.03	12.9											0.544	3.59	11.58
800	30					23.44	1	1	0	0	0	2	2		1.45	4.44	12.11	13.95															2.51	4.12	10.99											1.33	3.32	11.98
801	33					21.26	1	3	0	0	0	0	2		1.45	4.45	13.76	8.94															2.36	4.25	13.01											2.16	4.09	12.12	7.08
802	32					31.64	1	2	1	0	0	2	2		1.44	4.12	15.44	6.67															3.48	3.89	13.41											5.88	3.84	13.73
803	35					23.53	1	1	0	0	0	2	2		1.43	4.11	16	16.91															2.16	4.37	11.09											2.18	3.96	10	7.32
804	28					17.19	1	1	0	1	1	2	0		1.41	5	17.29	5.5															3.27	4.51	11.82											4.91	3.31	11.43
805	34					24.69	2	2	0	0	0	2	0		1.41	5.25	14.81	6.17															3.39	4.05	10.28											3.09	4.17	9.75
806	26					21.56	1	1	0	1	1	2	0		1.41	4.8	16.22	5															1.73	4.12	11.13											2.49	3.68	10.38
807	28					19.71	1	2	0	0	0	2	2		1.4	4.59	19.43	8.06															1.1	4.01	11.41											0.576	4.11	11.56
808	29					21.83	3	1	1	0	0	2	2		1.4	5.39	14.06	9.91															3.49	3.75	11.98											3.31	2.79	12.4	8.47
809	24					20.45	1	1	0	0	0	1	0		1.4	4.68	19.11	7.93															1.9	4.21	12.01											2.48	3.54	11.98
810	28					22.58	3	1	0	0	0	1	1		1.39	4.08	16.35	6.27															3.63	4.33	10.86											2.11	3.98	10.1
811	25					19.56	3	2	0	0	0	1	1		1.37	4.89	17.09	6.38															3.39	4.61	14.26											4.33	4.35	13.9	14.33
812	33					24.34	1	1	0	1	0	1	1		1.36	5.5	19.2																3.83	3.99	11.89	7.06										4.42	3.96	10.3	6.19
813	24					20.7	3	1	0	0	0	2	0		1.36	5.27	17.5	12.78															3.47	5	10.57											2.08	4.52	12.02	5.62
814	31					22.5	1	2	0	1	0	2	2		1.36	4.32	16.22	13.28															7.56	4.17	14.15											1.31	4.08	15.24
815	41					24.03	2	2	0	0	0	2	2		1.35	4.81	17.57	178.9															2.25	4.16	8.17											2.95	3.75	9.09
816	26					19.53	1	1	0	0	0	1	0		1.35	5	17.94	9.94															1.26	3.42	12.49	11.99										2.66	3.59	12.62	6.74
817	32					22.27	2	2	0	0	0	1	0		1.34	4.4	14.57	5.36															5.63	3.93	12.74											0.937	3.89	16.05	7.68
818	25					19.05	1	1	0	0	0	1	2		1.33	4.71	16.3	5															3.5	4.65	15.05											2.37	4.44	16.43
819	33					19.83	2	2	0	1	0	2	0		1.33	4.1	14.46	5.5															4.39	4.03	15.07											2.95	3.62	15.96
820	28					19.05	2	1	0	0	0	1	0		1.31	4.52	19.56	288.8															4.58	4.19	13.37											4.46	3.06	14.16
821	30					20.7	2	2	0	1	0	1	2		1.3	4.34	16.36	11.33															3.56	4.21	16.26	19.83										3.22	3.93	13.38
822	24					23.44	1	1	0	0	0	1	1		1.29	4.5	18.88	5.79															2.4	3.55	14.44											4.33	3.16	13.23
823	36					19.61	1	2	0	0	0	1	0		1.28	4.63	17.46	7															3.95	4.45	13.33	11.09										3.36	3.9	11.46
824	35					22.5	3	3	0	0	0	2	1		1.28	4.39	18.3	5.31															1.5	4.63	12.5	37.39										1.91	5.27	11.13	41.38
825	26					22.32	1	1	0	0	0	1	1		1.26	4.82	14.26	7.53															1.72	4.49	10.81											1.82	4.6	10.44	8.4
826	28					20.55	2	2	0	0	0	2	2		1.26	4.93	22.36	11.81															2.8	4.41	12.96											3.03	3.68	10.82	7.61
827	27					18.73	2	1	0	0	0	2	2		1.25	5.18	17.59	7.34															2.68	3.92	14.78											1.85	3.82	14.15
828	25					23.44	2	1	0	0	0	1	0		1.25	4.65	12.32	6.75															3.48	4.55	15.76											3.57	3.69	13.26	33.48
829	27					21.3	3	1	0	1	0	1	1		1.25	4.4	18.23	20.32															2.96	2.97	10.15											1.99	3.4	10.16
830	26					21.48	1	1	0	0	0	2	2		1.24	3.98	13.81	7.87															1.63	4.75	12.36											2.15	4.06	12.44	9.14
831	24					21.11	3	1	0	0	0	2	0		1.23	5.01	14.94	9.72															3.32	4.28	10.9											4.4	3.29	11.13
832	23					18.78	1	1	0	0	0	2	2		1.22	4.69	16.81	5.24															1.7	4.3	12.62											1.74	3.26	10.1
833	32					18.03	1	1	0	0	0	2	0		1.22	5.2	15.28	7															1.68	3.99	12.23											2.28	3.78	12.19
834	30					26.45	1	1	0	0	0	2	2		1.22	5.37	11.77	19.79															2.68	4.24	10.84											2.48	3.85	11.6	5
835	33					22.04	1	2	0	0	0	2	2		1.21	3.87	19.66	5.71															3.92	3.69	12.4	17.84										4.01	3.77	13.17	19.15
836	33					22.31	1	3	0	1	0	2	0		1.2	6.46	21.17	13.76															4.33	4.84	14.1											2.94	3.97	13.8
837	30					19.53	1	2	0	0	0	2	2		1.19	4.99	18.21	11.25															4.8	4.36	13.38											3.46	4.16	12.62
838	34					25	1	2	0	0	0	2	0		1.19	4.37	19.48	168.2															3.81	3.76	12.71											2.91	3.44	11.48	7.59
839	31					23.24	2	2	0	0	0	2	0		1.19	4.63	17.63	8.85															1.57	4.27	12.82	18.21										6.02	5.23	13.98	16.52
840	24					18.91	1	1	0	0	0	1	0		1.18	4.37	17.08	11.64															2.09	3.44	14.1											1.11	2.81	14.88
841	35					21.09	2	2	0	0	0	2	2		1.16	5.29	16.45	5.55															3.5	4.3	11.98											7.36	4.67	12.14
842	30					20.96	2	2	0	0	1	0	2		1.16	5.18	21.91	15.02															2.98	4.53	13.55											2.72	4.4	11.83
843	30					19.78	2	1	0	1	0	2	2		1.15	5.29	19.56	21.46															1.99	4.71	16.09											2.47	3.98	14.4	44.44
844	35					23.05	2	3	0	0	0	2	2		1.15	4.75	15.87	114.9															2.83	4.04	12.88											2.47	4.22	12.79
845	34					23.62	2	2	0	0	0	1	0		1.13	4.3	13.6	6.17															2.79	4.13	10.19											1.72	3.09	9.02	12.46
846	28					24.09	2	1	0	0	0	2	2		1.12	5.07	15.89	10.72															1.83	3.85	13.17											1.73	3.37	14.29	8.28
847	25					24.84	1	3	0	1	0	2	2		1.12	5.09	15.96	5.5															2.59	4.34	12.24											2.2	3.72	12.08	13.49
848	32					24.61	3	1	0	0	0	1	0		1.11	4.24	18.24	5															2.01	4.19	12.33											1.98	4.22	12.84	6.73
849	35					25.39	1	2	0	1	0	2	0		1.11	3.99	13.07	10.27															2.72	4.44	14.05											2.37	4.69	12.84
850	33					19.57	1	2	0	0	0	1	0		1.11	4.29	13.63	8.29															3.52	4.91	11.37											3.39	5.32	10.38
851	31					18.99	1	2	0	0	0	1	1		1.11	5.34	14.56	15.18															1.81	4.71	12.66	24.93										4.04	4.85	12.37	11.06
852	26					22.27	1	1	0	0	0	2	0		1.1	4.12	15.51	39.63															4.03	4.65	12.96	14.05										4.63	4.71	12.8	18.14
853	28					19.84	3	1	0	0	0	1	1		1.1	4.97	17.5	8.01															3.12	3.11	13.66											1.16	2.91	13.71
854	23					22.15	1	1	0	1	0	1	2		1.06	5.58	15.34	10.47															2.61	3.31	11.8											2.67	3.12	12.85
855	24					19.53	1	1	0	0	0	2	0		1.05	5.46	16.58	10.7															2.43	5.15	15.29	18.96										4.04	4.37	12.73	21.95
856	32					22.57	2	2	1	0	0	1	0		1.04	4.28	15.95	9.37															2.79	4	10.98											1.86	3.98	11.57
857	32					20.43	2	2	0	1	0	1	0		1.04	4.9	15.83	14.08															2.59	4	13.08											3.23	3.93	11.52	10.31
858	36					25.24	3	3	0	0	0	2	0		1.04	4.56	11.71	14.12															3.63	4.83	12.9	341.6										1.31	4.57	12.72	188.9
859	30					23.01	2	1	1	0	0	1	0		1.03	5.48	17.01	261.7															1.77	4.8	15.64											1.46	3.68	11.66
860	27					20.2	1	2	0	0	0	2	2		1.02	4.77	17.58	9.75															2.49	4.42	13.95											4.97	2.66	12.22	13.1
861	30					21.72	3	3	0	0	0	0	0		1.01	4.85	17.01	10.25															2.46	4.2	12.78											2.44	3.66	10.24	17.43
862	32					21.64	2	2	0	0	0	0	2		1.01	4.74	15.91	7.23															0.917	3.14	19.76											9.88	2	14.4	5.5
863	27					17.69	1	1	0	0	0	1	1		0.989	4.58	17.17	5.81															2.96	4.15	14.3											3.01	3.54	16.61
864	32					23.83	2	2	0	0	0	1	1		0.978	4.23	18.69	16.8															2.31	3.71	14.68											1.92	3.89	13.35	8.44
865	30					26.81	2	2	0	0	0	2	2		0.958	4.67	13.27	15.52															1.7	3.98	19											2.85	3.55	11.26
866	28					22.32	2	1	0	0	0	1	0		0.955	5.69	21.36	6.02															4.54	2.95	12.81											0.067	3.9	19.01
867	31					20.7	1	1	0	0	0	2	2		0.948	4.69	17.16	18.99															2.64	4.61	14.16											4.2	3.92	12.46	6.15
868	31					21.48	1	2	0	0	0	2	0		0.947	4.12	13.36	5															3.75	4.01	12.56											3.73	3.97	10.88
869	28					19.43	3	1	0	0	0	1	1		0.938	4.76	20																2.31	4.59	12.92											3.17	4.68	11.88
870	32					25.81	1	2	0	0	0	1	2		0.935	5.34	16.35	8.77															3.19	4.51	15.81	16.53										3.63	4.75	15.92	13.11
871	38					23.59	2	2	0	0	0	2	2		0.933	5.52	16.77	9.73															1.68	4.57	14.43											2.15	4.51	10.95	32.51
872	33					22.66	1	2	0	0	0	2	0		0.929	5.5	15.69	11.33															3.07	4.27	13.08	39.59										2.37	4.65	10.7	26.97
873	28					23.44	3	2	0	0	0	2	2		0.92	4.99	17.47	24.24															2.07	4.46	10.88											2.83	4.53	11.71
874	27					20.81	1	2	0	0	0	2	0		0.913	5.32	15.1	19.5															3.06	4.08	10.7											0.34	3.73	10.02	6.58
875	33					21.88	1	2	0	1	0	1	1		0.91	4.54	16.79	18.32															3.1	3.94	12.57											3.68	3.62	12.12
876	25					24.84	1	2	0	1	0	2	0		0.909	5.68	18.98	10.6															2.21	4.03	15.08											3.84	4.03	15.36
877	34					21.45	1	1	0	0	0	1	1		0.895	4.69	18.39	6.2															2.66	3.44	11.31	13.41										2.93	3.88	11.59	17.2
878	25					16.69	2	1	0	0	0	2	2		0.891	4.63	17.03	10.49															2.08	4.1	11.71											0.881	5.23	11.61	10.02
879	31					21.09	1	3	0	0	0	2	0		0.886	5.52	17.45	9.78															3	4.31	12.38											1.55	3.31	12.23
880	32					21.88	3	2	0	0	0	1	2		0.876	4.89	17.65	158.7															2.26	3.7	12.4											2.09	3.38	9.85	10.38
881	27					17.01	1	1	0	0	0	1	1		0.861	4.98	16.66	5.12															3.94	4.34	14.38											2.18	4.34	14.33
882	28					23.44	1	1	0	0	0	2	2		0.857	5.17	19.01	5.75															2.94	3.96	14.19											3.98	4.51	12.87
883	26					22.31	2	1	1	1	0	2	2		0.853	5.21	16.48	9.6															3.85	3.97	11.48											2.64	3.21	11.03
884	28					23.14	1	1	0	0	0	2	2		0.84	5.31	20.24	11.15															1.65	2.98	13.81											2.19	3.19	14.03
885	34					26.78	1	2	0	0	0	2	0		0.832	4.65	17.3	15.91															4.01	4.87	13.47	12.29										5.44	3.8	15.33
886	22					17.58	3	1	0	0	0	2	2		0.83	4.4	16.49	13															2.56	5.01	11.47											3.17	4.42	10.27	8.61
887	30					22.07	2	2	1	0	0	2	0		0.828	5.3	19.73	12.06															3.08	3.9	10.93											2.76	2.93	11.71
888	34					20.48	3	2	1	0	0	2	2		0.822	3.87	13.82	9.53															2.61	3.9	14.26											2.63	3.55	12.34
889	26					19.98	1	1	0	0	0	2	2		0.811	5.39	16.86	8.32															2.81	4.5	11.47	9.94										2.82	3.95	10.68	6.87
890	29					24.03	3	2	0	0	0	2	1		0.787	4.81	14.79																4.52	4.21	16.78											4.77	4.28	18.36
891	38					23.73	1	2	0	0	0	2	2		0.786	5.02	17.93	11.77															2.75	4.19	12.32											5.05	3.79	13.37
892	32					20.7	1	2	1	0	0	1	1		0.769	5.83	14.9																2.4	3.65	10.33											2.39	3.4	10.38
893	27					21.63	3	2	0	0	0	2	0		0.766	4.68	16.94	7.87															2.29	4.3	12.09											1.77	4.05	12.07
894	26					18.21	1	1	0	1	0	2	2		0.72	4.24	15.69	8.25															2.83	4.72	9.74											1.68	4.32	10.95
895	26					24.13	1	1	0	0	0	1	1		0.717	5.09	17.18	18.45															4.31	4.2	15.26											2.94	4	12.87
896	25					18.59	2	1	0	0	0	1	2		0.716	5.07	18.29	31.2															1.01	3.52	15.9											5.34	4.47	14.92
897	31					19.84	1	2	0	0	0	1	0		0.705	4.98	16.65	10.28															3	4.04	12.96											4.84	3.68	11.99	16.52
898	31					16.15	1	2	0	0	0	2	0		0.699	5.04	13.19	6.04															2.5	5.04	9.84											1.13	4.89	9.3
899	33					24.03	1	2	0	0	0	1	0		0.677	4.78	14.59	10.91															5.39	4.04	13.68											5.64	3.67	12.24	8.02
900	34					17.26	1	2	0	1	0	2	0		0.657	3.85	17.58	12.41															2.22	3.91	17.2	12.37										3.29	3.92	11.98	16.3
901	26					18.75	1	1	0	0	0	2	2		0.626	5.26	21.66	10.4															3.39	3.65	14.36											1.29	3.64	16.29	177.6
902	28					18.25	2	2	0	0	0	1	1		0.622	4.09	20.38	6.31															2.47	3.11	12.2											1.86	3.1	12.41
903	27					22.22	1	1	0	0	0	2	2		0.621	4.98	14.26	9.59															2.19	4.67	13.18											4.35	3.42	10.3	33.63
904	32					21.77	2	1	0	0	0	1	1		0.605	4.67	24.56																8.22	4.04	14.66											3.34	3.72	14.14
905	34					20.2	1	2	0	0	0	2	0		0.6	4.56	15.49	8.73															3.69	3.86	11.43											1.86	4.01	12.21
906	32					22.03	1	2	0	0	0	1	2		0.584	4.51	19.8	5.82															4.4	3.74	16.61											2.97	3.18	14.18
907	32					23.23	2	2	0	0	0	2	0		0.545	4.48	18.67	15.53															1.71	5.07	10.01											1.37	4.43	11.27
908	30					24.84	1	2	0	0	0	1	2		0.512	4.66	17.52																3.03	3.4	12.1											2.22	3.33	9.71
909	30					18.2	1	1	1	0	0	1	0		0.506	5.26	24.12																1.52	4.33	18.4											2.66	3.51	11.76
910	33					20.2	3	2	0	0	0	0	2		0.504	5.66	21.23	14.49															2.33	4.2	12.85											2.62	3.14	14.66	10.09
911	30					19.84	1	1	0	0	0	1	1		0.503	5.32	16.62																3.55	4.43	14.89	39.16										2.62	4.06	15.67	42.12
912	38					24.09	1	2	1	0	0	2	2		0.476	5.29	18.7	8.57															2.4	3.15	14.5											1.5	3.29	10.75	7.52
913	30					21.03	1	2	0	0	0	0	1		0.468	4.71	17.31	11.42															6.04	4.24	12.78											6.12	3.4	11.13	18.46
914	35					19.95	2	3	0	0	1	2	2		0.418	4.89	16.08	7.09															4.81	4.88	13.58											2.9	4.53	15.98
915	29					20.19	1	1	0	0	0	1	2		0.388	5.82	17.59	9.96															3.27	4.32	11.37											2.92	3.79	11.15	7.28
916	34					20.31	1	2	0	0	0	1	0		0.374	4.58	15.04	12.61															0.679	4.52	17											0.255	4.09	14.79
917	26					19.03	1	1	0	0	0	2	0		0.373	5.55	19.51	15.72															1.98	3.95	11.79											6.15	3.47	10.23
918	31					18.75	1	2	0	0	0	1	0		0.362	5.16	18.37	10.46															1.78	4.54	14.14											0.916	3.42	14.4
919	28					23.73	1	2	0	0	0	2	0		0.317	5.92	16.78	7.1															1.6	3.42	13.2											1.56	4.05	14.55
920	27					28.35	2	1	0	0	0	2	2		0.304	4.77	17.04	14.41															2.11	3.55	11.82											2.04	3.38	11.06
921	34					28.25	2	2	0	1	0	2	0		0.299	5.27	15.92	6.41															4.31	4.59	14.27											2.5	3.58	12.2
922	37					17.84	3	2	0	0	0	2	2		0.299	4.2	17.44	10.07															7.93	4.13	17.5											3.35	3.57	15.22	7.36
923	32					17.75	1	2	0	0	1	2	2		0.274	4.91	20.79	10.77															1.83	3.98	12.16											1.47	3.27	12.02
924	23					20.76	2	1	0	0	0	2	2		6.9	4.4	20.41	578.3															8.31	3.01	15.43	187.1										0.192	5.56	16.67
925	25					20.96	2	1	0	0	0	1	1		4.91	4.2	17.44	10.07															1.73	3.95	12.16											1.47	4.27	12.02
926	27					18.03	2	1	1	0	0	1	1		4.49	5.1	16.72	9.43															2.3	3.86	13.36											3.64	3.41	13.19
927	36					22.6	2	2	0	0	0	2	1		4.8	4.97	17.5	9.03															5.25	4.22	13.56											5.2	3.82	14.03	5.96
928	29					20	2	1	0	0	0	1	2		4.1	4.76	17.04	14.41															5.388	4.1	12.93											3.55	3.72	15.16
929	35					21	2	3	1	0	0	1	1		10.52	4.2	14.59																2.22	3.55	11.82											2.6	3.91	15
930	29					20	2	1	0	0	0	1	1		3.4	5.27	15.92	6.41															6.89	4.54	12.33											4.8	3.82	14.34
931	29					25.96	2	1	0	0	0	1	1		5.13	4.49	14.77	44.32															2.04	5.08	16.35											4.7	3	13.44
932	28					23.7	2	1	0	0	0	1	1		7.97	5.32	21.5																6.64	3.52	16.48											0.845	4.43	22.25
933	26					22.32	2	1	1	0	0	0	0		4.42	5.06	16.68	359.4															1.67	4.5	14.12											1.65	3.69	12.41	79.59
934	28					22.3	2	1	0	0	0	1	1		7.71	4.72	15.84	16.15															1.05	4.49	20.24											0.763	3.82	14.25
935	26					24.44	2	1	0	0	0	1	1		2.34	4.46	17.14																2.48	3.77	13.14											3.55	4.45	12.75
936	35					24.77	2	1	1	0	0	1	1		4.79	4.9	13.33	7.57															4.52	3.73	13.64	8.16										4.7	3.04	13.21
937	29					23.43	2	1	0	0	0	1	1		8.74	4.29	14.5	10.32															4.96	4.74	15.86											3.29	4.14	10.45
938	31					25.56	1	2	0	0	0	1	1		6.57	4.87	15.49	17.32															4.16	4.23	14.77											4.99	4.49	13.89
[truncated: 37 more columns]
